# Supplementary material for: Determination of Genes Related to Uveitis by Utilization of the Random Walk with Restart Algorithm on a Protein–Protein Interaction Network
Source: MDPI journal article supplement (doi:10.3390/ijms18051045), 2017-05-13
Supplement: s1 [file s1]

**Supplementary Table I.** Candidate genes yielded by RWR-based method and their measurements

| <b>Ensembl ID</b> | <b>Gene symbol</b> | <b>Probability</b> | <b>P-value</b> | <b>MIS</b> | <b>MFS</b> |
|-------------------|--------------------|--------------------|----------------|------------|------------|
| ENSP00000328973   | TSPO               | 3.93E-04           | <0.001         | 865        | 0.684      |
| ENSP00000348986   | INS-IGF2           | 3.70E-04           | <0.001         | 968        | 0.767      |
| ENSP00000263341   | IL1B               | 3.58E-04           | <0.001         | 999        | 0.873      |
| ENSP00000360266   | JUN                | 3.22E-04           | <0.001         | 999        | 0.831      |
| ENSP00000221930   | TGFB1              | 2.90E-04           | <0.001         | 997        | 0.832      |
| ENSP00000228534   | IL23A              | 2.87E-04           | <0.001         | 998        | 0.844      |
| ENSP00000296871   | CSF2               | 2.71E-04           | <0.001         | 992        | 0.875      |
| ENSP00000354394   | STAT1              | 2.63E-04           | <0.001         | 999        | 0.852      |
| ENSP00000245907   | C3                 | 2.51E-04           | <0.001         | 999        | 0.660      |
| ENSP00000216341   | GZMB               | 2.46E-04           | <0.001         | 991        | 0.829      |
| ENSP00000369293   | IL2RA              | 2.46E-04           | <0.001         | 999        | 0.866      |
| ENSP00000364114   | HLA-DRB5           | 2.27E-04           | <0.001         | 948        | 0.822      |
| ENSP00000356694   | FASLG              | 2.27E-04           | <0.001         | 965        | 0.795      |
| ENSP00000278385   | CD44               | 2.26E-04           | <0.001         | 986        | 0.797      |
| ENSP00000260010   | TLR2               | 2.25E-04           | <0.001         | 968        | 0.888      |
| ENSP00000290866   | ACE                | 2.25E-04           | <0.001         | 874        | 0.707      |
| ENSP00000294728   | VCAM1              | 2.23E-04           | <0.001         | 968        | 0.882      |
| ENSP00000356346   | PTPRC              | 2.18E-04           | <0.001         | 994        | 0.826      |
| ENSP00000264246   | CD80               | 2.18E-04           | <0.001         | 999        | 0.820      |
| ENSP00000313419   | CD19               | 2.15E-04           | <0.001         | 947        | 0.837      |

|                 |          |          |        |     |       |
|-----------------|----------|----------|--------|-----|-------|
| ENSP00000354901 | CXCL9    | 2.13E-04 | <0.001 | 999 | 0.883 |
| ENSP00000365435 | TNFRSF1B | 2.13E-04 | <0.001 | 996 | 0.794 |
| ENSP00000229239 | GAPDH    | 2.12E-04 | <0.001 | 922 | 0.824 |
| ENSP00000396688 | C4A      | 2.10E-04 | <0.001 | 812 | 0.564 |
| ENSP00000375881 | ALPP     | 2.10E-04 | <0.001 | 948 | 0.752 |
| ENSP00000337825 | LCK      | 2.10E-04 | <0.001 | 999 | 0.741 |
| ENSP00000318472 | NCAM1    | 2.04E-04 | <0.001 | 958 | 0.701 |
| ENSP00000295453 | ALPPL2   | 2.02E-04 | <0.001 | 948 | 0.752 |
| ENSP00000359663 | CD40LG   | 1.97E-04 | <0.001 | 999 | 0.839 |
| ENSP00000320084 | CD276    | 1.91E-04 | <0.001 | 955 | 0.823 |
| ENSP00000283635 | CD8A     | 1.91E-04 | <0.001 | 990 | 0.815 |
| ENSP00000416330 | TGFBI    | 1.91E-04 | <0.001 | 917 | 0.813 |
| ENSP00000310036 | CD34     | 1.88E-04 | <0.001 | 924 | 0.794 |
| ENSP00000296545 | IL15     | 1.85E-04 | <0.001 | 946 | 0.806 |
| ENSP00000386884 | CXCR4    | 1.82E-04 | <0.001 | 995 | 0.791 |
| ENSP00000263339 | IL1A     | 1.82E-04 | <0.001 | 996 | 0.820 |
| ENSP00000379625 | MYD88    | 1.82E-04 | <0.001 | 999 | 0.882 |
| ENSP00000302665 | IGF1     | 1.81E-04 | <0.001 | 947 | 0.800 |
| ENSP00000274306 | GZMA     | 1.80E-04 | <0.001 | 908 | 0.718 |
| ENSP00000300134 | STAT6    | 1.77E-04 | <0.001 | 999 | 0.804 |
| ENSP00000361405 | MMP9     | 1.70E-04 | <0.001 | 971 | 0.833 |
| ENSP00000379110 | CXCL1    | 1.69E-04 | <0.001 | 973 | 0.827 |

|                 |          |          |        |     |       |
|-----------------|----------|----------|--------|-----|-------|
| ENSP00000229402 | KLRB1    | 1.68E-04 | <0.001 | 677 | 0.688 |
| ENSP00000259206 | IL1RN    | 1.68E-04 | <0.001 | 999 | 0.836 |
| ENSP00000351671 | CCL20    | 1.65E-04 | <0.001 | 999 | 0.841 |
| ENSP00000250151 | CCL4     | 1.64E-04 | <0.001 | 994 | 0.820 |
| ENSP00000287497 | ITGAM    | 1.63E-04 | <0.001 | 999 | 0.793 |
| ENSP00000372815 | C4A      | 1.62E-04 | <0.001 | 565 | 0.564 |
| ENSP00000227752 | IL10RA   | 1.62E-04 | <0.001 | 999 | 0.770 |
| ENSP00000263321 | TYR      | 1.61E-04 | <0.001 | 659 | 0.731 |
| ENSP00000410046 | HLA-DRB4 | 1.61E-04 | <0.001 | 669 | 0.000 |
| ENSP00000263967 | PIK3CA   | 1.59E-04 | <0.001 | 962 | 0.765 |
| ENSP00000416022 | HLA-DRB3 | 1.58E-04 | <0.001 | 750 | 0.000 |
| ENSP00000337127 | SOD2     | 1.56E-04 | <0.001 | 958 | 0.657 |
| ENSP00000353874 | TLR9     | 1.55E-04 | <0.001 | 958 | 0.854 |
| ENSP00000225474 | CSF3     | 1.55E-04 | <0.001 | 916 | 0.829 |
| ENSP00000223642 | C5       | 1.55E-04 | <0.001 | 906 | 0.518 |
| ENSP00000229794 | MAPK14   | 1.53E-04 | <0.001 | 963 | 0.796 |
| ENSP00000415941 | C4B      | 1.53E-04 | <0.001 | 893 | 0.376 |
| ENSP00000252486 | APOE     | 1.52E-04 | <0.001 | 927 | 0.765 |
| ENSP00000364444 | C4A      | 1.51E-04 | <0.001 | 609 | 0.564 |
| ENSP00000286758 | CXCL13   | 1.49E-04 | <0.001 | 986 | 0.806 |
| ENSP00000245414 | IRF1     | 1.48E-04 | <0.001 | 992 | 0.728 |
| ENSP00000365048 | TNFSF13B | 1.48E-04 | <0.001 | 931 | 0.747 |

|                 |          |          |        |     |       |
|-----------------|----------|----------|--------|-----|-------|
| ENSP00000314425 | IL12RB1  | 1.48E-04 | <0.001 | 993 | 0.772 |
| ENSP00000412786 | C4B_2    | 1.47E-04 | <0.001 | 565 | 0.448 |
| ENSP00000388662 | C4A      | 1.46E-04 | <0.001 | 567 | 0.564 |
| ENSP00000327251 | NOS2     | 1.46E-04 | <0.001 | 973 | 0.735 |
| ENSP00000331736 | SELE     | 1.46E-04 | <0.001 | 978 | 0.830 |
| ENSP00000336769 | KIR2DL1  | 1.45E-04 | <0.001 | 999 | 0.552 |
| ENSP00000226279 | CD38     | 1.43E-04 | <0.001 | 981 | 0.774 |
| ENSP00000352121 | PIK3CG   | 1.41E-04 | <0.001 | 930 | 0.777 |
| ENSP00000368450 | CD83     | 1.40E-04 | <0.001 | 927 | 0.787 |
| ENSP00000329411 | IRF7     | 1.38E-04 | <0.001 | 925 | 0.738 |
| ENSP00000349252 | ITGAL    | 1.37E-04 | <0.001 | 999 | 0.740 |
| ENSP00000259607 | CCL21    | 1.36E-04 | <0.001 | 999 | 0.798 |
| ENSP00000375608 | KIR3DL1  | 1.35E-04 | <0.001 | 988 | 0.542 |
| ENSP00000354566 | CD3E     | 1.34E-04 | <0.001 | 968 | 0.735 |
| ENSP00000358501 | CD58     | 1.32E-04 | <0.001 | 929 | 0.701 |
| ENSP00000304915 | IL13     | 1.31E-04 | <0.001 | 999 | 0.813 |
| ENSP00000410857 | HLA-DRB4 | 1.30E-04 | <0.001 | 673 | 0.768 |
| ENSP00000225245 | CCL3     | 1.29E-04 | <0.001 | 997 | 0.757 |
| ENSP00000338130 | KLRD1    | 1.29E-04 | <0.001 | 902 | 0.593 |
| ENSP00000263686 | SELP     | 1.28E-04 | <0.001 | 930 | 0.743 |
| ENSP00000306884 | CXCL11   | 1.28E-04 | <0.001 | 999 | 0.818 |
| ENSP00000296028 | PPBP     | 1.28E-04 | <0.001 | 948 | 0.789 |

|                 |        |          |        |     |       |
|-----------------|--------|----------|--------|-----|-------|
| ENSP00000369554 | IFNA2  | 1.27E-04 | <0.001 | 972 | 0.717 |
| ENSP00000225844 | CCL13  | 1.27E-04 | <0.001 | 994 | 0.779 |
| ENSP00000274520 | IL9    | 1.27E-04 | <0.001 | 965 | 0.806 |
| ENSP00000358490 | CD2    | 1.26E-04 | <0.001 | 837 | 0.591 |
| ENSP00000370034 | TLR7   | 1.26E-04 | <0.001 | 926 | 0.819 |
| ENSP00000216223 | IL2RB  | 1.24E-04 | <0.001 | 999 | 0.663 |
| ENSP00000276927 | IFNA1  | 1.22E-04 | <0.001 | 899 | 0.740 |
| ENSP00000302234 | CCL11  | 1.22E-04 | <0.001 | 996 | 0.720 |
| ENSP00000289153 | PIK3CB | 1.21E-04 | <0.001 | 963 | 0.784 |
| ENSP00000259271 | GAD2   | 1.20E-04 | <0.001 | 563 | 0.322 |
| ENSP00000300692 | CD3D   | 1.20E-04 | <0.001 | 938 | 0.609 |
| ENSP00000347197 | C5AR1  | 1.19E-04 | <0.001 | 933 | 0.774 |
| ENSP00000366563 | PIK3CD | 1.18E-04 | <0.001 | 921 | 0.757 |
| ENSP00000308815 | CCL19  | 1.17E-04 | <0.001 | 998 | 0.792 |
| ENSP00000291890 | NCR1   | 1.16E-04 | <0.001 | 540 | 0.594 |
| ENSP00000357470 | IL6R   | 1.16E-04 | <0.001 | 999 | 0.792 |
| ENSP00000370343 | IRF4   | 1.13E-04 | <0.001 | 917 | 0.711 |
| ENSP00000348273 | MBP    | 1.13E-04 | <0.001 | 752 | 0.652 |
| ENSP00000329418 | SOCS1  | 1.13E-04 | <0.001 | 999 | 0.732 |
| ENSP00000298125 | WDFY2  | 1.11E-04 | <0.001 | 562 | 0.747 |
| ENSP00000296027 | CXCL5  | 1.11E-04 | <0.001 | 958 | 0.811 |
| ENSP00000377141 | ARRB1  | 1.10E-04 | <0.001 | 950 | 0.409 |

|                 |        |          |        |     |       |
|-----------------|--------|----------|--------|-----|-------|
| ENSP00000411940 | IFNA17 | 1.10E-04 | <0.001 | 894 | 0.711 |
| ENSP00000369574 | IFNA21 | 1.10E-04 | <0.001 | 894 | 0.720 |
| ENSP00000390707 | HLA-E  | 1.09E-04 | <0.001 | 556 | 0.707 |
| ENSP00000353472 | HLA-G  | 1.08E-04 | <0.001 | 908 | 0.647 |
| ENSP00000308165 | CD36   | 1.07E-04 | <0.001 | 914 | 0.728 |
| ENSP00000352064 | KLRC1  | 1.06E-04 | <0.001 | 907 | 0.568 |
| ENSP00000209873 | AAAS   | 1.06E-04 | <0.001 | 346 | 0.135 |
| ENSP00000395005 | MOG    | 1.06E-04 | <0.001 | 926 | 0.646 |
| ENSP00000391898 | MOG    | 1.06E-04 | <0.001 | 926 | 0.646 |
| ENSP00000390785 | MOG    | 1.06E-04 | <0.001 | 926 | 0.646 |
| ENSP00000366095 | MOG    | 1.05E-04 | <0.001 | 926 | 0.646 |
| ENSP00000357025 | CD48   | 1.05E-04 | <0.001 | 845 | 0.671 |
| ENSP00000004921 | CCL18  | 1.05E-04 | <0.001 | 921 | 0.738 |
| ENSP00000296029 | PF4    | 1.04E-04 | <0.001 | 981 | 0.671 |
| ENSP00000240618 | KLRK1  | 1.03E-04 | <0.001 | 461 | 0.526 |
| ENSP00000299855 | MMP3   | 1.03E-04 | <0.001 | 894 | 0.717 |
| ENSP00000319635 | CXCR2  | 1.02E-04 | <0.001 | 999 | 0.851 |
| ENSP00000293778 | CXCL16 | 1.02E-04 | <0.001 | 952 | 0.800 |
| ENSP00000342300 | NELFCD | 1.02E-04 | <0.001 | 788 | 0.722 |
| ENSP00000354932 | TLR1   | 9.99E-05 | <0.001 | 804 | 0.653 |
| ENSP00000252723 | EPO    | 9.98E-05 | <0.001 | 963 | 0.749 |
| ENSP00000362994 | TRAF1  | 9.94E-05 | <0.001 | 998 | 0.727 |

|                 |          |          |        |     |       |
|-----------------|----------|----------|--------|-----|-------|
| ENSP00000268296 | ITGAX    | 9.79E-05 | <0.001 | 970 | 0.674 |
| ENSP00000200307 | CCL7     | 9.79E-05 | <0.001 | 988 | 0.686 |
| ENSP00000264563 | IL11     | 9.69E-05 | <0.001 | 965 | 0.766 |
| ENSP00000303276 | RNASE2   | 9.66E-05 | <0.001 | 430 | 0.589 |
| ENSP00000160262 | ICAM3    | 9.66E-05 | <0.001 | 905 | 0.732 |
| ENSP00000348019 | SLC17A5  | 9.57E-05 | <0.001 | 307 | 0.517 |
| ENSP00000375086 | CCL25    | 9.51E-05 | <0.001 | 958 | 0.743 |
| ENSP00000323074 | RAI1     | 9.49E-05 | <0.001 | 428 | 0.150 |
| ENSP00000338010 | IL21R    | 9.48E-05 | <0.001 | 999 | 0.775 |
| ENSP00000393646 | HLA-DMB  | 9.47E-05 | <0.001 | 852 | 0.681 |
| ENSP00000296026 | CXCL3    | 9.47E-05 | <0.001 | 946 | 0.755 |
| ENSP00000325525 | KIR3DL2  | 9.46E-05 | <0.001 | 962 | 0.459 |
| ENSP00000416509 | LTA      | 9.36E-05 | <0.001 | 645 | 0.701 |
| ENSP00000352672 | PGLYRP4  | 9.31E-05 | <0.001 | 722 | 0.721 |
| ENSP00000397331 | HLA-G    | 9.28E-05 | <0.001 | 895 | 0.647 |
| ENSP00000340011 | KIR2DS4  | 9.27E-05 | <0.001 | 961 | 0.493 |
| ENSP00000409132 | HLA-G    | 9.27E-05 | <0.001 | 900 | 0.647 |
| ENSP00000221452 | RELB     | 9.23E-05 | <0.001 | 919 | 0.711 |
| ENSP00000363115 | FGR      | 9.18E-05 | <0.001 | 954 | 0.654 |
| ENSP00000200691 | MT3      | 9.18E-05 | <0.001 | 611 | 0.727 |
| ENSP00000292144 | CD3G     | 9.07E-05 | <0.001 | 939 | 0.574 |
| ENSP00000407674 | HLA-DPB1 | 8.97E-05 | <0.001 | 629 | 0.734 |

|                 |          |          |        |     |       |
|-----------------|----------|----------|--------|-----|-------|
| ENSP00000326432 | CCR8     | 8.90E-05 | <0.001 | 951 | 0.816 |
| ENSP00000387624 | HLA-G    | 8.88E-05 | <0.001 | 899 | 0.647 |
| ENSP00000398655 | ITK      | 8.87E-05 | <0.001 | 951 | 0.652 |
| ENSP00000364076 | HLA-DQA2 | 8.85E-05 | <0.001 | 955 | 0.726 |
| ENSP00000269280 | NLRP1    | 8.82E-05 | <0.001 | 995 | 0.623 |
| ENSP00000312262 | ADRBK1   | 8.80E-05 | <0.001 | 988 | 0.485 |
| ENSP00000312326 | AOC3     | 8.71E-05 | <0.001 | 839 | 0.665 |
| ENSP00000295683 | CXCR1    | 8.67E-05 | <0.001 | 999 | 0.833 |
| ENSP00000359504 | GBP1     | 8.62E-05 | <0.001 | 923 | 0.532 |
| ENSP00000397420 | HLA-E    | 8.53E-05 | <0.001 | 552 | 0.707 |
| ENSP00000226317 | CXCL6    | 8.49E-05 | <0.001 | 939 | 0.736 |
| ENSP00000281834 | TNFSF4   | 8.40E-05 | <0.001 | 641 | 0.688 |
| ENSP00000229134 | IL26     | 8.18E-05 | <0.001 | 675 | 0.736 |
| ENSP00000296861 | TNFRSF21 | 7.99E-05 | <0.001 | 461 | 0.352 |
| ENSP00000228438 | CLEC2B   | 7.91E-05 | <0.001 | 506 | 0.580 |
| ENSP00000247153 | CFP      | 7.86E-05 | <0.001 | 805 | 0.626 |
| ENSP00000364396 | TNXB     | 7.82E-05 | <0.001 | 758 | 0.321 |
| ENSP00000316333 | CD55     | 7.70E-05 | <0.001 | 896 | 0.547 |
| ENSP00000315997 | LILRB1   | 7.59E-05 | <0.001 | 953 | 0.465 |
| ENSP00000221847 | EBI3     | 7.58E-05 | <0.001 | 932 | 0.725 |
| ENSP00000349365 | IL27     | 7.51E-05 | <0.001 | 803 | 0.767 |
| ENSP00000229708 | ULBP1    | 7.41E-05 | <0.001 | 674 | 0.508 |



|                 |          |          |        |     |       |
|-----------------|----------|----------|--------|-----|-------|
| ENSP00000403495 | LTA      | 7.36E-05 | <0.001 | 430 | 0.701 |
| ENSP00000225842 | CCL1     | 7.35E-05 | <0.001 | 956 | 0.666 |
| ENSP00000407133 | LTA      | 7.32E-05 | <0.001 | 430 | 0.701 |
| ENSP00000416337 | LTA      | 7.32E-05 | <0.001 | 430 | 0.701 |
| ENSP00000360181 | SH2D1A   | 7.21E-05 | <0.001 | 867 | 0.627 |
| ENSP00000372582 | HLA-DPB1 | 7.15E-05 | <0.001 | 466 | 0.734 |
| ENSP00000222902 | CCL24    | 7.14E-05 | <0.001 | 988 | 0.580 |
| ENSP00000349562 | CCDC180  | 6.98E-05 | <0.001 | 462 | 0.550 |
| ENSP00000290200 | IL10RB   | 6.94E-05 | <0.001 | 986 | 0.589 |
| ENSP00000356792 | XCL1     | 6.80E-05 | <0.001 | 886 | 0.597 |
| ENSP00000216968 | PROCR    | 6.77E-05 | <0.001 | 890 | 0.450 |
| ENSP00000375829 | LAD1     | 6.75E-05 | <0.001 | 516 | 0.361 |
| ENSP00000263461 | WDR11    | 6.75E-05 | <0.001 | 540 | 0.239 |
| ENSP00000319883 | EMR2     | 6.74E-05 | <0.001 | 235 | 0.274 |
| ENSP00000382422 | HLA-DPB1 | 6.72E-05 | <0.001 | 364 | 0.734 |
| ENSP00000215631 | GADD45B  | 6.72E-05 | <0.001 | 926 | 0.602 |
| ENSP00000351473 | GIMAP5   | 6.66E-05 | <0.001 | 880 | 0.716 |
| ENSP00000260356 | THBS1    | 6.62E-05 | <0.001 | 834 | 0.710 |
| ENSP00000220616 | TG       | 6.62E-05 | <0.001 | 508 | 0.485 |
| ENSP00000245903 | CD70     | 6.50E-05 | <0.001 | 997 | 0.711 |
| ENSP00000397587 | HLA-DPA1 | 6.49E-05 | <0.001 | 618 | 0.380 |
| ENSP00000363330 | CD52     | 6.45E-05 | <0.001 | 541 | 0.529 |

|                 |          |          |        |     |       |
|-----------------|----------|----------|--------|-----|-------|
| ENSP00000393355 | MICB     | 6.39E-05 | <0.001 | 907 | 0.509 |
| ENSP00000311856 | SLC25A30 | 6.38E-05 | <0.001 | 562 | 0.773 |
| ENSP00000279544 | KLRF1    | 6.37E-05 | <0.001 | 373 | 0.525 |
| ENSP00000295400 | TGFA     | 6.37E-05 | <0.001 | 931 | 0.703 |
| ENSP00000293280 | CCL23    | 6.34E-05 | <0.001 | 983 | 0.526 |
| ENSP00000407561 | MICB     | 6.33E-05 | <0.001 | 426 | 0.509 |
| ENSP00000348918 | SAA1     | 6.32E-05 | <0.001 | 806 | 0.654 |
| ENSP00000383142 | NFKBIL1  | 6.08E-05 | <0.001 | 375 | 0.414 |
| ENSP00000411611 | NFKBIL1  | 6.07E-05 | <0.001 | 375 | 0.414 |
| ENSP00000288709 | MMEL1    | 6.07E-05 | <0.001 | 463 | 0.408 |
| ENSP00000365318 | NFKBIL1  | 6.05E-05 | <0.001 | 375 | 0.414 |
| ENSP00000366729 | TNFRSF9  | 6.04E-05 | <0.001 | 899 | 0.502 |
| ENSP00000330374 | GIMAP6   | 6.00E-05 | <0.001 | 922 | 0.642 |
| ENSP00000332812 | PTGDR2   | 5.89E-05 | <0.001 | 918 | 0.737 |
| ENSP00000407942 | C4B      | 5.86E-05 | <0.001 | 370 | 0.376 |
| ENSP00000345008 | FBLN5    | 5.84E-05 | <0.001 | 429 | 0.261 |
| ENSP00000302833 | GIMAP1   | 5.79E-05 | <0.001 | 793 | 0.594 |
| ENSP00000245817 | TNFSF9   | 5.75E-05 | <0.001 | 874 | 0.697 |
| ENSP00000395544 | NFKBIL1  | 5.62E-05 | <0.001 | 297 | 0.414 |
| ENSP00000394486 | NFKBIL1  | 5.62E-05 | <0.001 | 297 | 0.414 |
| ENSP00000235933 | CD160    | 5.59E-05 | <0.001 | 857 | 0.491 |
| ENSP00000398890 | HLA-DMB  | 5.47E-05 | <0.001 | 613 | 0.681 |

|                 |          |          |        |     |       |
|-----------------|----------|----------|--------|-----|-------|
| ENSP00000354575 | LSR      | 5.44E-05 | <0.001 | 750 | 0.598 |
| ENSP00000320709 | ADIPOQ   | 5.20E-05 | <0.001 | 909 | 0.423 |
| ENSP00000357152 | CD1C     | 4.93E-05 | <0.001 | 657 | 0.656 |
| ENSP00000264952 | GRK7     | 4.90E-05 | <0.001 | 800 | 0.125 |
| ENSP00000281631 | PARP8    | 4.83E-05 | <0.001 | 183 | 0.199 |
| ENSP00000252229 | MICB     | 4.74E-05 | <0.001 | 673 | 0.509 |
| ENSP00000393566 | HLA-DPA1 | 4.70E-05 | <0.001 | 764 | 0.380 |
| ENSP00000349709 | RAET1E   | 4.60E-05 | <0.001 | 417 | 0.332 |
| ENSP00000356552 | MR1      | 4.55E-05 | <0.001 | 552 | 0.558 |
| ENSP00000306523 | INSM2    | 4.43E-05 | <0.001 | 563 | 0.139 |
| ENSP00000243347 | TNFAIP6  | 4.43E-05 | <0.001 | 517 | 0.322 |
| ENSP00000324742 | IL32     | 4.20E-05 | <0.001 | 877 | 0.601 |
| ENSP00000356329 | RAET1G   | 4.14E-05 | <0.001 | 401 | 0.431 |
| ENSP00000349893 | DLK2     | 4.06E-05 | <0.001 | 407 | 0.207 |
| ENSP00000337432 | IL17F    | 3.62E-05 | <0.001 | 914 | 0.593 |
| ENSP00000265598 | LAMP3    | 3.61E-05 | <0.001 | 611 | 0.615 |
| ENSP00000344095 | ZNF683   | 1.75E-05 | <0.001 | 657 | 0.379 |
| ENSP00000162749 | TNFRSF1A | 2.30E-04 | 0.001  | 999 | 0.826 |
| ENSP00000316328 | CIITA    | 1.70E-04 | 0.001  | 933 | 0.659 |
| ENSP00000330341 | SOCS3    | 1.50E-04 | 0.001  | 999 | 0.786 |
| ENSP00000342215 | KIR2DL3  | 1.49E-04 | 0.001  | 999 | 0.526 |
| ENSP00000313967 | C1QB     | 1.42E-04 | 0.001  | 902 | 0.598 |

|                 |         |          |       |     |       |
|-----------------|---------|----------|-------|-----|-------|
| ENSP00000383645 | KIR3DS1 | 1.35E-04 | 0.001 | 966 | 0.572 |
| ENSP00000219070 | MMP2    | 1.23E-04 | 0.001 | 940 | 0.733 |
| ENSP00000343204 | JAK1    | 1.21E-04 | 0.001 | 999 | 0.818 |
| ENSP00000262407 | ITGA2B  | 1.16E-04 | 0.001 | 825 | 0.496 |
| ENSP00000225275 | MPO     | 1.14E-04 | 0.001 | 922 | 0.766 |
| ENSP00000292174 | CXCR5   | 1.14E-04 | 0.001 | 976 | 0.820 |
| ENSP00000189444 | NFKB2   | 1.07E-04 | 0.001 | 922 | 0.636 |
| ENSP00000356946 | FCGR3A  | 1.07E-04 | 0.001 | 867 | 0.701 |
| ENSP00000369581 | IFNB1   | 1.04E-04 | 0.001 | 927 | 0.684 |
| ENSP00000372793 | LTA     | 9.43E-05 | 0.001 | 647 | 0.701 |
| ENSP00000357757 | LCE1C   | 9.11E-05 | 0.001 | 750 | 0.931 |
| ENSP00000357776 | LCE3D   | 9.00E-05 | 0.001 | 889 | 0.529 |
| ENSP00000352071 | CD163   | 8.66E-05 | 0.001 | 912 | 0.629 |
| ENSP00000402134 | MICA    | 8.49E-05 | 0.001 | 821 | 0.463 |
| ENSP00000241261 | TNFSF10 | 8.28E-05 | 0.001 | 750 | 0.756 |
| ENSP00000243786 | INHA    | 8.23E-05 | 0.001 | 987 | 0.510 |
| ENSP00000339634 | KIR2DL4 | 7.90E-05 | 0.001 | 899 | 0.429 |
| ENSP00000331172 | CD8B    | 7.88E-05 | 0.001 | 963 | 0.581 |
| ENSP00000356429 | RGS1    | 7.84E-05 | 0.001 | 934 | 0.641 |
| ENSP00000261233 | IRAK3   | 7.74E-05 | 0.001 | 961 | 0.675 |
| ENSP00000282397 | FLT1    | 7.69E-05 | 0.001 | 999 | 0.711 |
| ENSP00000359497 | GBP2    | 7.36E-05 | 0.001 | 915 | 0.512 |

|                 |           |          |       |     |       |
|-----------------|-----------|----------|-------|-----|-------|
| ENSP00000216117 | HMOX1     | 7.31E-05 | 0.001 | 931 | 0.644 |
| ENSP00000241453 | FLT3      | 7.14E-05 | 0.001 | 885 | 0.756 |
| ENSP00000330138 | SSTR3     | 7.00E-05 | 0.001 | 901 | 0.458 |
| ENSP00000293275 | CCL16     | 6.95E-05 | 0.001 | 998 | 0.678 |
| ENSP00000371327 | KLRC2     | 6.75E-05 | 0.001 | 851 | 0.452 |
| ENSP00000354416 | CCL28     | 6.24E-05 | 0.001 | 967 | 0.617 |
| ENSP00000337065 | CXCL14    | 6.23E-05 | 0.001 | 859 | 0.563 |
| ENSP00000376445 | TIRAP     | 6.16E-05 | 0.001 | 999 | 0.749 |
| ENSP00000377204 | GRK6      | 5.80E-05 | 0.001 | 962 | 0.271 |
| ENSP00000309124 | OLR1      | 5.78E-05 | 0.001 | 901 | 0.566 |
| ENSP00000332116 | PDE4B     | 5.71E-05 | 0.001 | 813 | 0.159 |
| ENSP00000306565 | ISG20     | 5.69E-05 | 0.001 | 929 | 0.536 |
| ENSP00000261652 | TNFRSF13B | 5.65E-05 | 0.001 | 540 | 0.632 |
| ENSP00000319476 | ICOS      | 5.08E-05 | 0.001 | 886 | 0.715 |
| ENSP00000226524 | PF4V1     | 5.01E-05 | 0.001 | 860 | 0.242 |
| ENSP00000355812 | FGFR1OP   | 4.90E-05 | 0.001 | 899 | 0.125 |
| ENSP00000408146 | HLA-DPB1  | 4.89E-05 | 0.001 | 715 | 0.734 |
| ENSP00000216160 | TAB1      | 4.74E-05 | 0.001 | 999 | 0.642 |
| ENSP00000302935 | IL16      | 4.35E-05 | 0.001 | 983 | 0.573 |
| ENSP00000286380 | RAET1L    | 3.24E-05 | 0.001 | 495 | 0.427 |
| ENSP00000373006 | MICB      | 3.09E-05 | 0.001 | 324 | 0.509 |
| ENSP00000407092 | MICB      | 2.95E-05 | 0.001 | 324 | 0.509 |

|                 |          |          |       |     |       |
|-----------------|----------|----------|-------|-----|-------|
| ENSP00000293218 | UNK      | 2.66E-05 | 0.001 | 335 | 0.206 |
| ENSP00000412031 | HLA-DRB4 | 1.68E-04 | 0.002 | 916 | 0.000 |
| ENSP00000296795 | TLR3     | 1.58E-04 | 0.002 | 966 | 0.858 |
| ENSP00000363773 | C1QA     | 1.57E-04 | 0.002 | 965 | 0.535 |
| ENSP00000372607 | HLA-DRB3 | 1.56E-04 | 0.002 | 878 | 0.000 |
| ENSP00000375844 | CAPN10   | 1.32E-04 | 0.002 | 724 | 0.256 |
| ENSP00000357721 | S100A8   | 1.26E-04 | 0.002 | 943 | 0.588 |
| ENSP00000414196 | HLA-DPB1 | 1.24E-04 | 0.002 | 907 | 0.734 |
| ENSP00000273550 | FTH1     | 1.16E-04 | 0.002 | 907 | 0.615 |
| ENSP00000342681 | CD5      | 1.11E-04 | 0.002 | 945 | 0.762 |
| ENSP00000356033 | TAGAP    | 1.10E-04 | 0.002 | 593 | 0.504 |
| ENSP00000315477 | CD209    | 9.39E-05 | 0.002 | 904 | 0.737 |
| ENSP00000304414 | CXCR6    | 9.27E-05 | 0.002 | 964 | 0.803 |
| ENSP00000315768 | STAT2    | 9.06E-05 | 0.002 | 998 | 0.678 |
| ENSP00000363079 | MBL2     | 9.06E-05 | 0.002 | 747 | 0.586 |
| ENSP00000340089 | TLR5     | 8.44E-05 | 0.002 | 857 | 0.795 |
| ENSP00000377218 | IRF2     | 8.14E-05 | 0.002 | 917 | 0.655 |
| ENSP00000302079 | C3AR1    | 8.12E-05 | 0.002 | 942 | 0.723 |
| ENSP00000291582 | AIRE     | 7.73E-05 | 0.002 | 515 | 0.420 |
| ENSP00000381599 | MX1      | 7.35E-05 | 0.002 | 927 | 0.601 |
| ENSP00000335006 | LCE3A    | 7.07E-05 | 0.002 | 540 | 0.426 |
| ENSP00000337383 | NLRP3    | 6.46E-05 | 0.002 | 955 | 0.743 |

|                 |          |          |       |     |       |
|-----------------|----------|----------|-------|-----|-------|
| ENSP00000366307 | THBD     | 6.42E-05 | 0.002 | 973 | 0.642 |
| ENSP00000333639 | IFNL2    | 6.25E-05 | 0.002 | 806 | 0.488 |
| ENSP00000354612 | PTGS1    | 6.04E-05 | 0.002 | 851 | 0.608 |
| ENSP00000343505 | TNFSF13  | 5.97E-05 | 0.002 | 401 | 0.646 |
| ENSP00000358092 | PRDM1    | 5.78E-05 | 0.002 | 463 | 0.485 |
| ENSP00000404533 | HLA-DRA  | 5.62E-05 | 0.002 | 728 | 0.654 |
| ENSP00000282141 | CRYGC    | 5.41E-05 | 0.002 | 659 | 0.615 |
| ENSP00000261745 | NAA25    | 5.13E-05 | 0.002 | 462 | 0.252 |
| ENSP00000286639 | BATF     | 5.03E-05 | 0.002 | 669 | 0.379 |
| ENSP00000371376 | TLR6     | 5.01E-05 | 0.002 | 609 | 0.771 |
| ENSP00000265421 | POLB     | 4.49E-05 | 0.002 | 294 | 0.173 |
| ENSP00000264260 | IL18RAP  | 4.47E-05 | 0.002 | 996 | 0.470 |
| ENSP00000324827 | AKAP17A  | 4.31E-05 | 0.002 | 317 | 0.395 |
| ENSP00000218721 | MLNR     | 4.03E-05 | 0.002 | 899 | 0.546 |
| ENSP00000300305 | RUNX1    | 2.14E-04 | 0.003 | 963 | 0.674 |
| ENSP00000219235 | CCL22    | 1.24E-04 | 0.003 | 983 | 0.795 |
| ENSP00000363958 | BRD2     | 1.19E-04 | 0.003 | 859 | 0.456 |
| ENSP00000334869 | LCE1A    | 9.51E-05 | 0.003 | 730 | 0.866 |
| ENSP00000270357 | RNPEPL1  | 8.90E-05 | 0.003 | 462 | 0.302 |
| ENSP00000328207 | TNFRSF18 | 7.31E-05 | 0.003 | 942 | 0.680 |
| ENSP00000343040 | HMGB1    | 7.19E-05 | 0.003 | 970 | 0.585 |
| ENSP00000262158 | SMAD7    | 7.16E-05 | 0.003 | 899 | 0.754 |

|                 |          |          |       |     |       |
|-----------------|----------|----------|-------|-----|-------|
| ENSP00000351497 | FCGR2B   | 7.14E-05 | 0.003 | 872 | 0.674 |
| ENSP00000357980 | HTRA1    | 7.06E-05 | 0.003 | 430 | 0.367 |
| ENSP00000229281 | C12orf57 | 7.05E-05 | 0.003 | 917 | 0.323 |
| ENSP00000255409 | CHI3L1   | 6.84E-05 | 0.003 | 893 | 0.391 |
| ENSP00000376609 | GRK5     | 6.39E-05 | 0.003 | 899 | 0.474 |
| ENSP00000372817 | STK19    | 6.38E-05 | 0.003 | 401 | 0.191 |
| ENSP00000246551 | HCST     | 6.33E-05 | 0.003 | 585 | 0.631 |
| ENSP00000264870 | F13A1    | 6.25E-05 | 0.003 | 942 | 0.450 |
| ENSP00000392398 | GPX5     | 6.09E-05 | 0.003 | 922 | 0.479 |
| ENSP00000364482 | STK19    | 6.06E-05 | 0.003 | 649 | 0.191 |
| ENSP00000417404 | HFE      | 5.72E-05 | 0.003 | 563 | 0.295 |
| ENSP00000405295 | HLA-DRA  | 5.67E-05 | 0.003 | 782 | 0.654 |
| ENSP00000316460 | FYB      | 5.65E-05 | 0.003 | 929 | 0.544 |
| ENSP00000380855 | PDCD1LG2 | 4.68E-05 | 0.003 | 970 | 0.637 |
| ENSP00000358831 | ELOVL4   | 4.55E-05 | 0.003 | 530 | 0.074 |
| ENSP00000347596 | EFEMP1   | 4.46E-05 | 0.003 | 390 | 0.214 |
| ENSP00000349477 | KLRG1    | 4.35E-05 | 0.003 | 833 | 0.445 |
| ENSP00000408534 | TNFAIP8  | 3.42E-05 | 0.003 | 904 | 0.176 |
| ENSP00000391592 | PTPN6    | 1.32E-04 | 0.004 | 998 | 0.657 |
| ENSP00000330382 | PDGFB    | 1.31E-04 | 0.004 | 956 | 0.744 |
| ENSP00000357727 | S100A9   | 1.18E-04 | 0.004 | 939 | 0.664 |
| ENSP00000265023 | KNG1     | 1.15E-04 | 0.004 | 941 | 0.614 |



|                 |          |          |       |     |       |
|-----------------|----------|----------|-------|-----|-------|
| ENSP00000231454 | IL5      | 1.13E-04 | 0.004 | 991 | 0.803 |
| ENSP00000328173 | C1S      | 9.76E-05 | 0.004 | 929 | 0.558 |
| ENSP00000263408 | C9       | 9.37E-05 | 0.004 | 414 | 0.457 |
| ENSP00000223095 | SERPINE1 | 9.33E-05 | 0.004 | 961 | 0.713 |
| ENSP00000364802 | HSPA1A   | 8.87E-05 | 0.004 | 766 | 0.603 |
| ENSP00000357013 | CD244    | 7.92E-05 | 0.004 | 379 | 0.468 |
| ENSP00000370473 | IGFBP3   | 7.90E-05 | 0.004 | 910 | 0.701 |
| ENSP00000222823 | NOD1     | 7.72E-05 | 0.004 | 991 | 0.866 |
| ENSP00000362299 | ENG      | 7.33E-05 | 0.004 | 732 | 0.612 |
| ENSP00000271588 | HMCN1    | 7.28E-05 | 0.004 | 502 | 0.243 |
| ENSP00000367851 | CYBB     | 7.26E-05 | 0.004 | 817 | 0.530 |
| ENSP00000247829 | TSPAN8   | 6.06E-05 | 0.004 | 363 | 0.386 |
| ENSP00000392762 | DCT      | 5.73E-05 | 0.004 | 613 | 0.578 |
| ENSP00000293328 | STAT5B   | 5.60E-05 | 0.004 | 999 | 0.668 |
| ENSP00000203629 | LAG3     | 5.59E-05 | 0.004 | 567 | 0.604 |
| ENSP00000373024 | C6orf15  | 5.50E-05 | 0.004 | 899 | 0.261 |
| ENSP00000222002 | SULT2A1  | 4.98E-05 | 0.004 | 403 | 0.371 |
| ENSP00000357022 | SLAMF7   | 4.59E-05 | 0.004 | 500 | 0.312 |
| ENSP00000327890 | IL3RA    | 4.55E-05 | 0.004 | 972 | 0.676 |
| ENSP00000409910 | HLA-E    | 4.51E-05 | 0.004 | 800 | 0.707 |
| ENSP00000305107 | GIMAP8   | 4.34E-05 | 0.004 | 828 | 0.434 |
| ENSP00000014930 | HEBP1    | 3.30E-05 | 0.004 | 902 | 0.512 |

|                 |         |          |       |     |       |
|-----------------|---------|----------|-------|-----|-------|
| ENSP00000259205 | IL36G   | 2.25E-05 | 0.004 | 269 | 0.439 |
| ENSP00000408697 | NUGGC   | 1.03E-05 | 0.004 | 204 | 0.371 |
| ENSP00000231449 | IL4     | 2.55E-04 | 0.005 | 999 | 0.852 |
| ENSP00000357981 | CTSS    | 1.68E-04 | 0.005 | 972 | 0.720 |
| ENSP00000340944 | PTPN11  | 1.48E-04 | 0.005 | 999 | 0.664 |
| ENSP00000250092 | CD68    | 1.30E-04 | 0.005 | 753 | 0.753 |
| ENSP00000367605 | CCL3L3  | 1.24E-04 | 0.005 | 995 | 0.458 |
| ENSP00000200652 | SLC22A4 | 1.05E-04 | 0.005 | 540 | 0.414 |
| ENSP00000333298 | LAMP1   | 1.01E-04 | 0.005 | 812 | 0.426 |
| ENSP00000264896 | SCARB2  | 9.30E-05 | 0.005 | 906 | 0.733 |
| ENSP00000373091 | HLA-E   | 9.02E-05 | 0.005 | 784 | 0.707 |
| ENSP00000263464 | BIRC3   | 8.92E-05 | 0.005 | 996 | 0.672 |
| ENSP00000419945 | ERVW-1  | 8.27E-05 | 0.005 | 969 | 0.567 |
| ENSP00000283977 | PGM3    | 8.11E-05 | 0.005 | 462 | 0.123 |
| ENSP00000231009 | GZMK    | 8.00E-05 | 0.005 | 767 | 0.658 |
| ENSP00000263923 | KDR     | 7.93E-05 | 0.005 | 957 | 0.703 |
| ENSP00000339151 | IKBKB   | 7.81E-05 | 0.005 | 986 | 0.639 |
| ENSP00000296585 | ITGA2   | 7.33E-05 | 0.005 | 852 | 0.582 |
| ENSP00000409151 | HSPA1L  | 6.51E-05 | 0.005 | 396 | 0.272 |
| ENSP00000306190 | SLAMF1  | 6.42E-05 | 0.005 | 458 | 0.583 |
| ENSP00000248071 | KLF2    | 6.20E-05 | 0.005 | 466 | 0.540 |
| ENSP00000234347 | PRTN3   | 5.84E-05 | 0.005 | 804 | 0.593 |

|                 |          |          |       |     |       |
|-----------------|----------|----------|-------|-----|-------|
| ENSP00000260227 | MMP7     | 5.61E-05 | 0.005 | 884 | 0.657 |
| ENSP00000329869 | TPO      | 5.17E-05 | 0.005 | 424 | 0.357 |
| ENSP00000406495 | TNXB     | 4.74E-05 | 0.005 | 368 | 0.321 |
| ENSP00000387438 | TNXB     | 4.72E-05 | 0.005 | 368 | 0.321 |
| ENSP00000389677 | TNXB     | 4.72E-05 | 0.005 | 368 | 0.321 |
| ENSP00000409159 | HLA-DQB2 | 4.71E-05 | 0.005 | 817 | 0.294 |
| ENSP00000308479 | GPR171   | 4.69E-05 | 0.005 | 577 | 0.571 |
| ENSP00000369312 | IL15RA   | 3.60E-05 | 0.005 | 809 | 0.593 |
| ENSP00000397073 | TRIM10   | 3.14E-05 | 0.005 | 296 | 0.373 |
| ENSP00000332766 | NPB      | 3.07E-05 | 0.005 | 899 | 0.484 |
| ENSP00000326407 | CLEC1A   | 2.64E-05 | 0.005 | 625 | 0.477 |
| ENSP00000313437 | MMP19    | 2.51E-05 | 0.005 | 859 | 0.162 |
| ENSP00000226574 | NFKB1    | 1.88E-04 | 0.006 | 981 | 0.717 |
| ENSP00000363548 | CXCL12   | 1.74E-04 | 0.006 | 986 | 0.758 |
| ENSP00000351697 | REV3L    | 1.53E-04 | 0.006 | 661 | 0.710 |
| ENSP00000391676 | JAK3     | 1.52E-04 | 0.006 | 997 | 0.764 |
| ENSP00000354782 | CD247    | 1.20E-04 | 0.006 | 951 | 0.623 |
| ENSP00000306697 | MRAP     | 1.09E-04 | 0.006 | 849 | 0.492 |
| ENSP00000388001 | OAS1     | 1.02E-04 | 0.006 | 923 | 0.621 |
| ENSP00000356016 | CR1      | 9.62E-05 | 0.006 | 871 | 0.585 |
| ENSP00000372746 | HLA-DRA  | 9.50E-05 | 0.006 | 952 | 0.654 |
| ENSP00000261693 | SCARB1   | 9.03E-05 | 0.006 | 906 | 0.719 |

|                 |          |          |       |     |       |
|-----------------|----------|----------|-------|-----|-------|
| ENSP00000227758 | BIRC2    | 8.26E-05 | 0.006 | 999 | 0.603 |
| ENSP00000294800 | FCGR3B   | 7.77E-05 | 0.006 | 430 | 0.512 |
| ENSP00000302707 | FPR1     | 7.70E-05 | 0.006 | 933 | 0.702 |
| ENSP00000356954 | CTGF     | 7.07E-05 | 0.006 | 914 | 0.757 |
| ENSP00000394624 | OPRM1    | 6.94E-05 | 0.006 | 908 | 0.496 |
| ENSP00000293276 | CCL15    | 6.88E-05 | 0.006 | 966 | 0.379 |
| ENSP00000301838 | FADD     | 6.78E-05 | 0.006 | 977 | 0.725 |
| ENSP00000263379 | IL27RA   | 6.62E-05 | 0.006 | 942 | 0.671 |
| ENSP00000378130 | CFI      | 6.42E-05 | 0.006 | 992 | 0.478 |
| ENSP00000273430 | AGTR1    | 5.69E-05 | 0.006 | 899 | 0.557 |
| ENSP00000356793 | XCL2     | 5.59E-05 | 0.006 | 834 | 0.618 |
| ENSP00000360973 | AGTR2    | 5.14E-05 | 0.006 | 900 | 0.480 |
| ENSP00000334876 | GRK1     | 5.01E-05 | 0.006 | 824 | 0.121 |
| ENSP00000263087 | ITGAE    | 3.98E-05 | 0.006 | 563 | 0.487 |
| ENSP00000307722 | NSG2     | 3.90E-05 | 0.006 | 514 | 0.000 |
| ENSP00000340125 | PPP1R17  | 3.74E-05 | 0.006 | 229 | 0.096 |
| ENSP00000345676 | 1-Mar    | 3.74E-05 | 0.006 | 864 | 0.643 |
| ENSP00000386378 | CD207    | 3.09E-05 | 0.006 | 517 | 0.620 |
| ENSP00000363965 | ALPL     | 1.96E-04 | 0.007 | 942 | 0.749 |
| ENSP00000216797 | NFKBIA   | 1.31E-04 | 0.007 | 982 | 0.757 |
| ENSP00000364898 | SYK      | 1.29E-04 | 0.007 | 983 | 0.739 |
| ENSP00000389288 | HLA-DPB1 | 1.24E-04 | 0.007 | 669 | 0.734 |

|                 |          |          |       |     |       |
|-----------------|----------|----------|-------|-----|-------|
| ENSP00000252444 | LDLR     | 1.03E-04 | 0.007 | 894 | 0.667 |
| ENSP00000339804 | TSLP     | 9.67E-05 | 0.007 | 962 | 0.772 |
| ENSP00000290722 | PGLYRP3  | 9.37E-05 | 0.007 | 722 | 0.778 |
| ENSP00000268638 | IRF8     | 8.33E-05 | 0.007 | 915 | 0.661 |
| ENSP00000233957 | IL18R1   | 8.21E-05 | 0.007 | 983 | 0.725 |
| ENSP00000333358 | RNASE10  | 7.38E-05 | 0.007 | 262 | 0.258 |
| ENSP00000271450 | FCGR2A   | 7.25E-05 | 0.007 | 978 | 0.591 |
| ENSP00000218032 | TLR8     | 6.69E-05 | 0.007 | 877 | 0.756 |
| ENSP00000345984 | TRAF3IP2 | 6.63E-05 | 0.007 | 663 | 0.305 |
| ENSP00000279281 | VPS51    | 6.62E-05 | 0.007 | 399 | 0.054 |
| ENSP00000221515 | RETN     | 6.23E-05 | 0.007 | 942 | 0.619 |
| ENSP00000261937 | FLT4     | 6.06E-05 | 0.007 | 957 | 0.694 |
| ENSP00000340210 | CD59     | 5.95E-05 | 0.007 | 851 | 0.453 |
| ENSP00000360869 | IFIT1    | 5.71E-05 | 0.007 | 922 | 0.595 |
| ENSP00000378723 | HLA-DMB  | 5.65E-05 | 0.007 | 834 | 0.681 |
| ENSP00000322788 | MMP1     | 5.62E-05 | 0.007 | 953 | 0.713 |
| ENSP00000327850 | NFATC1   | 5.33E-05 | 0.007 | 985 | 0.599 |
| ENSP00000406872 | HLA-DQB2 | 4.74E-05 | 0.007 | 817 | 0.294 |
| ENSP00000272928 | CXCR7    | 4.02E-05 | 0.007 | 927 | 0.643 |
| ENSP00000288840 | SMAD6    | 3.76E-05 | 0.007 | 899 | 0.553 |
| ENSP00000308925 | TLR10    | 3.28E-05 | 0.007 | 828 | 0.703 |
| ENSP00000298527 | CLEC1B   | 3.04E-05 | 0.007 | 657 | 0.406 |

|                 |           |          |       |     |       |
|-----------------|-----------|----------|-------|-----|-------|
| ENSP00000303242 | ITGB2     | 1.35E-04 | 0.008 | 999 | 0.727 |
| ENSP00000249075 | LIF       | 1.26E-04 | 0.008 | 962 | 0.793 |
| ENSP00000264606 | HDAC4     | 1.13E-04 | 0.008 | 739 | 0.443 |
| ENSP00000263863 | GNLY      | 9.83E-05 | 0.008 | 838 | 0.568 |
| ENSP00000338018 | HIF1A     | 9.56E-05 | 0.008 | 957 | 0.749 |
| ENSP00000375629 | LILRB2    | 9.38E-05 | 0.008 | 946 | 0.688 |
| ENSP00000333685 | MAPK11    | 8.07E-05 | 0.008 | 936 | 0.638 |
| ENSP00000336829 | FGG       | 8.02E-05 | 0.008 | 947 | 0.525 |
| ENSP00000405533 | CCL4L1    | 7.86E-05 | 0.008 | 886 | 0.629 |
| ENSP00000259089 | BLK       | 7.26E-05 | 0.008 | 899 | 0.485 |
| ENSP00000263621 | ELANE     | 7.25E-05 | 0.008 | 946 | 0.676 |
| ENSP00000046794 | LCP2      | 6.87E-05 | 0.008 | 951 | 0.585 |
| ENSP00000396486 | HSPA1L    | 6.53E-05 | 0.008 | 396 | 0.272 |
| ENSP00000365016 | IRS2      | 6.42E-05 | 0.008 | 983 | 0.577 |
| ENSP00000370842 | IL33      | 5.56E-05 | 0.008 | 929 | 0.728 |
| ENSP00000342278 | OAS2      | 5.48E-05 | 0.008 | 910 | 0.466 |
| ENSP00000252506 | GADD45G   | 5.35E-05 | 0.008 | 906 | 0.310 |
| ENSP00000297350 | TNFRSF11B | 5.13E-05 | 0.008 | 867 | 0.662 |
| ENSP00000363157 | TNFSF15   | 5.01E-05 | 0.008 | 565 | 0.614 |
| ENSP00000314299 | CFHR1     | 4.99E-05 | 0.008 | 902 | 0.357 |
| ENSP00000353452 | MYLK      | 4.82E-05 | 0.008 | 911 | 0.510 |
| ENSP00000364016 | PSMB8     | 4.72E-05 | 0.008 | 318 | 0.321 |

|                 |         |          |       |     |       |
|-----------------|---------|----------|-------|-----|-------|
| ENSP00000411321 | HLA-DMB | 3.98E-05 | 0.008 | 899 | 0.681 |
| ENSP00000360195 | KANK4   | 3.90E-05 | 0.008 | 899 | 0.159 |
| ENSP00000313309 | FUZ     | 3.82E-05 | 0.008 | 219 | 0.162 |
| ENSP00000355870 | HLX     | 3.17E-05 | 0.008 | 939 | 0.473 |
| ENSP00000353500 | CLEC4C  | 2.99E-05 | 0.008 | 567 | 0.604 |
| ENSP00000364028 | ECE1    | 2.03E-05 | 0.008 | 363 | 0.390 |
| ENSP00000356438 | PTGS2   | 1.92E-04 | 0.009 | 972 | 0.864 |
| ENSP00000402694 | HLA-E   | 1.09E-04 | 0.009 | 896 | 0.707 |
| ENSP00000265132 | AMBP    | 1.04E-04 | 0.009 | 519 | 0.404 |
| ENSP00000308620 | RAG2    | 9.98E-05 | 0.009 | 784 | 0.761 |
| ENSP00000334145 | F3      | 8.36E-05 | 0.009 | 947 | 0.722 |
| ENSP00000395701 | TAPBP   | 7.89E-05 | 0.009 | 882 | 0.280 |
| ENSP00000301974 | PTAFR   | 7.78E-05 | 0.009 | 954 | 0.651 |
| ENSP00000284818 | LY96    | 6.81E-05 | 0.009 | 999 | 0.730 |
| ENSP00000288602 | BRAF    | 6.57E-05 | 0.009 | 575 | 0.391 |
| ENSP00000372608 | HLA-DRA | 6.14E-05 | 0.009 | 982 | 0.654 |
| ENSP00000356087 | IKBKE   | 5.80E-05 | 0.009 | 985 | 0.570 |
| ENSP00000356320 | ULBP2   | 5.54E-05 | 0.009 | 817 | 0.479 |
| ENSP00000409197 | CCL14   | 5.53E-05 | 0.009 | 981 | 0.314 |
| ENSP00000334122 | FGF3    | 5.27E-05 | 0.009 | 463 | 0.612 |
| ENSP00000306185 | ANTXR2  | 4.55E-05 | 0.009 | 550 | 0.461 |
| ENSP00000330659 | SOCS7   | 3.96E-05 | 0.009 | 823 | 0.353 |

|                 |         |          |       |     |       |
|-----------------|---------|----------|-------|-----|-------|
| ENSP00000263636 | LY75    | 3.89E-05 | 0.009 | 500 | 0.660 |
| ENSP00000264316 | TXK     | 3.44E-05 | 0.009 | 675 | 0.559 |
| ENSP00000219244 | CCL17   | 1.20E-04 | 0.01  | 984 | 0.808 |
| ENSP00000348170 | HP      | 1.16E-04 | 0.01  | 926 | 0.600 |
| ENSP00000248594 | PTPN12  | 8.83E-05 | 0.01  | 954 | 0.584 |
| ENSP00000259631 | CCL27   | 7.89E-05 | 0.01  | 950 | 0.704 |
| ENSP00000224784 | ACTA2   | 7.77E-05 | 0.01  | 687 | 0.616 |
| ENSP00000380073 | IRF9    | 6.54E-05 | 0.01  | 963 | 0.607 |
| ENSP00000391798 | STK19   | 6.33E-05 | 0.01  | 401 | 0.191 |
| ENSP00000371328 | KLRC3   | 6.31E-05 | 0.01  | 829 | 0.420 |
| ENSP00000350467 | NAT9    | 6.10E-05 | 0.01  | 409 | 0.266 |
| ENSP00000248598 | FGL2    | 6.06E-05 | 0.01  | 835 | 0.692 |
| ENSP00000357986 | PLEKHA1 | 6.02E-05 | 0.01  | 657 | 0.246 |
| ENSP00000357103 | DARC    | 5.92E-05 | 0.01  | 981 | 0.515 |
| ENSP00000239849 | TNFSF11 | 5.55E-05 | 0.01  | 927 | 0.625 |
| ENSP00000380785 | HOOK2   | 4.69E-05 | 0.01  | 425 | 0.220 |
| ENSP00000402951 | HLA-DRA | 4.45E-05 | 0.01  | 917 | 0.654 |
| ENSP00000308361 | P2RY14  | 4.45E-05 | 0.01  | 921 | 0.473 |
| ENSP00000317891 | TNIP1   | 4.21E-05 | 0.01  | 997 | 0.477 |
| ENSP00000377783 | PROS1   | 4.20E-05 | 0.01  | 928 | 0.517 |
| ENSP00000378195 | GPR75   | 4.18E-05 | 0.01  | 271 | 0.262 |
| ENSP00000302855 | ZNF280A | 3.59E-05 | 0.01  | 283 | 0.439 |



|                 |          |          |       |     |       |
|-----------------|----------|----------|-------|-----|-------|
| ENSP00000329212 | ATF7     | 3.44E-05 | 0.01  | 921 | 0.209 |
| ENSP00000356024 | CR2      | 3.31E-05 | 0.01  | 340 | 0.497 |
| ENSP00000396656 | NFKBIL1  | 3.09E-05 | 0.01  | 899 | 0.414 |
| ENSP00000415805 | AIF1     | 2.73E-05 | 0.01  | 462 | 0.446 |
| ENSP00000239761 | MRC1     | 2.47E-05 | 0.01  | 307 | 0.399 |
| ENSP00000372912 | LY6G6F   | 1.24E-05 | 0.01  | 210 | 0.280 |
| ENSP00000295025 | REL      | 1.26E-04 | 0.011 | 936 | 0.761 |
| ENSP00000278407 | SERPING1 | 1.21E-04 | 0.011 | 918 | 0.562 |
| ENSP00000297494 | NOS3     | 1.06E-04 | 0.011 | 944 | 0.724 |
| ENSP00000302150 | PRL      | 1.01E-04 | 0.011 | 994 | 0.684 |
| ENSP00000010338 | TRAF3IP3 | 1.00E-04 | 0.011 | 899 | 0.368 |
| ENSP00000266646 | INHBE    | 8.24E-05 | 0.011 | 829 | 0.737 |
| ENSP00000229022 | VDR      | 8.11E-05 | 0.011 | 540 | 0.668 |
| ENSP00000368632 | GATA3    | 6.95E-05 | 0.011 | 944 | 0.585 |
| ENSP00000345492 | SH2B3    | 6.01E-05 | 0.011 | 985 | 0.306 |
| ENSP00000356056 | DYNLT1   | 5.94E-05 | 0.011 | 565 | 0.226 |
| ENSP00000323280 | CD6      | 5.65E-05 | 0.011 | 625 | 0.529 |
| ENSP00000339428 | SOCS2    | 5.56E-05 | 0.011 | 962 | 0.630 |
| ENSP00000302569 | CLEC7A   | 5.54E-05 | 0.011 | 657 | 0.603 |
| ENSP00000314173 | SAMD12   | 5.01E-05 | 0.011 | 513 | 0.235 |
| ENSP00000372721 | PSMB9    | 4.88E-05 | 0.011 | 657 | 0.293 |
| ENSP00000260049 | IL18BP   | 4.80E-05 | 0.011 | 984 | 0.702 |

|                 |         |          |       |     |       |
|-----------------|---------|----------|-------|-----|-------|
| ENSP00000332139 | CFD     | 4.54E-05 | 0.011 | 899 | 0.538 |
| ENSP00000320936 | IL17RA  | 4.39E-05 | 0.011 | 993 | 0.641 |
| ENSP00000256452 | IL5RA   | 3.51E-05 | 0.011 | 995 | 0.593 |
| ENSP00000188790 | FAP     | 3.39E-05 | 0.011 | 423 | 0.122 |
| ENSP00000244360 | RNF39   | 3.17E-05 | 0.011 | 385 | 0.279 |
| ENSP00000316737 | LCE1D   | 3.16E-05 | 0.011 | 513 | 0.382 |
| ENSP00000333656 | SIGIRR  | 2.88E-05 | 0.011 | 738 | 0.643 |
| ENSP00000354581 | GPX6    | 2.63E-05 | 0.011 | 284 | 0.214 |
| ENSP00000387930 | RNF39   | 2.60E-05 | 0.011 | 273 | 0.279 |
| ENSP00000356713 | IFNGR1  | 1.03E-04 | 0.012 | 999 | 0.740 |
| ENSP00000355627 | AGT     | 9.51E-05 | 0.012 | 896 | 0.652 |
| ENSP00000261942 | FAF2    | 9.12E-05 | 0.012 | 619 | 0.099 |
| ENSP00000215637 | MADCAM1 | 8.95E-05 | 0.012 | 909 | 0.676 |
| ENSP00000220751 | RIPK2   | 8.14E-05 | 0.012 | 999 | 0.759 |
| ENSP00000369820 | PIGA    | 6.97E-05 | 0.012 | 514 | 0.254 |
| ENSP00000311857 | PTPN2   | 6.76E-05 | 0.012 | 978 | 0.456 |
| ENSP00000263388 | NOTCH3  | 6.24E-05 | 0.012 | 994 | 0.799 |
| ENSP00000227251 | CRYAB   | 5.80E-05 | 0.012 | 822 | 0.393 |
| ENSP00000375872 | ATG16L1 | 5.58E-05 | 0.012 | 953 | 0.589 |
| ENSP00000290524 | RFX5    | 5.08E-05 | 0.012 | 318 | 0.222 |
| ENSP00000320509 | BANK1   | 5.06E-05 | 0.012 | 578 | 0.489 |
| ENSP00000290219 | IFNGR2  | 4.92E-05 | 0.012 | 990 | 0.671 |

|                 |          |          |       |     |       |
|-----------------|----------|----------|-------|-----|-------|
| ENSP00000363869 | VSIG4    | 4.57E-05 | 0.012 | 552 | 0.381 |
| ENSP00000267015 | GPR84    | 4.54E-05 | 0.012 | 272 | 0.275 |
| ENSP00000357038 | SLAMF6   | 4.52E-05 | 0.012 | 374 | 0.469 |
| ENSP00000320376 | P2RY13   | 4.14E-05 | 0.012 | 921 | 0.616 |
| ENSP00000350005 | GIP      | 4.01E-05 | 0.012 | 227 | 0.305 |
| ENSP00000401149 | TAP1     | 3.95E-05 | 0.012 | 297 | 0.347 |
| ENSP00000313644 | MAP4K4   | 3.91E-05 | 0.012 | 884 | 0.359 |
| ENSP00000378288 | MYLK3    | 3.87E-05 | 0.012 | 850 | 0.274 |
| ENSP00000256649 | TRIM45   | 3.74E-05 | 0.012 | 461 | 0.324 |
| ENSP00000353586 | ZNF280B  | 3.73E-05 | 0.012 | 290 | 0.464 |
| ENSP00000407291 | RNF39    | 3.29E-05 | 0.012 | 401 | 0.279 |
| ENSP00000408539 | RNF39    | 3.29E-05 | 0.012 | 401 | 0.279 |
| ENSP00000294671 | GBP7     | 3.27E-05 | 0.012 | 509 | 0.197 |
| ENSP00000415480 | TRIM15   | 3.01E-05 | 0.012 | 288 | 0.353 |
| ENSP00000393693 | LTB      | 2.94E-05 | 0.012 | 340 | 0.503 |
| ENSP00000358783 | NPBWR2   | 2.87E-05 | 0.012 | 899 | 0.535 |
| ENSP00000072516 | IL1RAP   | 2.70E-05 | 0.012 | 996 | 0.293 |
| ENSP00000204637 | FLT3LG   | 2.67E-05 | 0.012 | 418 | 0.414 |
| ENSP00000258449 | TGFBRAP1 | 2.57E-05 | 0.012 | 899 | 0.233 |
| ENSP00000296513 | ADAD1    | 2.41E-05 | 0.012 | 366 | 0.290 |
| ENSP00000373079 | ATAT1    | 2.37E-05 | 0.012 | 899 | 0.346 |
| ENSP00000349929 | SDCCAG3  | 2.26E-05 | 0.012 | 362 | 0.472 |

|                 |         |          |       |     |       |
|-----------------|---------|----------|-------|-----|-------|
| ENSP00000311300 | CTSW    | 2.23E-05 | 0.012 | 354 | 0.180 |
| ENSP00000296870 | IL3     | 1.45E-04 | 0.013 | 994 | 0.794 |
| ENSP00000224237 | VIM     | 1.21E-04 | 0.013 | 976 | 0.754 |
| ENSP00000307875 | B3GAT1  | 8.95E-05 | 0.013 | 788 | 0.552 |
| ENSP00000378546 | TAPBP   | 7.94E-05 | 0.013 | 886 | 0.280 |
| ENSP00000369213 | DDX58   | 7.25E-05 | 0.013 | 954 | 0.673 |
| ENSP00000295718 | PTPRN   | 7.19E-05 | 0.013 | 507 | 0.192 |
| ENSP00000226218 | SEBOX   | 7.07E-05 | 0.013 | 878 | 0.643 |
| ENSP00000343023 | SP100   | 6.69E-05 | 0.013 | 926 | 0.384 |
| ENSP00000280193 | VEGFC   | 6.69E-05 | 0.013 | 916 | 0.742 |
| ENSP00000221466 | FCGRT   | 6.50E-05 | 0.013 | 441 | 0.431 |
| ENSP00000384708 | FSHR    | 6.45E-05 | 0.013 | 229 | 0.382 |
| ENSP00000409346 | CISH    | 5.88E-05 | 0.013 | 973 | 0.709 |
| ENSP00000314620 | MS4A1   | 5.69E-05 | 0.013 | 796 | 0.584 |
| ENSP00000402406 | PSMB8   | 5.12E-05 | 0.013 | 460 | 0.321 |
| ENSP00000291860 | KIR3DL3 | 5.07E-05 | 0.013 | 859 | 0.505 |
| ENSP00000409378 | CHRM4   | 4.97E-05 | 0.013 | 900 | 0.451 |
| ENSP00000360281 | C8B     | 4.70E-05 | 0.013 | 374 | 0.387 |
| ENSP00000333657 | MX2     | 4.41E-05 | 0.013 | 910 | 0.504 |
| ENSP00000296511 | ANXA5   | 4.41E-05 | 0.013 | 839 | 0.666 |
| ENSP00000270279 | CBLC    | 4.10E-05 | 0.013 | 800 | 0.382 |
| ENSP00000412310 | SKIV2L  | 3.99E-05 | 0.013 | 369 | 0.162 |

|                 |                 |          |       |     |       |
|-----------------|-----------------|----------|-------|-----|-------|
| ENSP00000263409 | LIFR            | 3.88E-05 | 0.013 | 948 | 0.551 |
| ENSP00000372713 | HLA-DOA         | 3.54E-05 | 0.013 | 564 | 0.249 |
| ENSP00000216802 | PSME2           | 3.06E-05 | 0.013 | 829 | 0.366 |
| ENSP00000370979 | CRLF2           | 2.88E-05 | 0.013 | 958 | 0.588 |
| ENSP00000365227 | AIF1            | 2.75E-05 | 0.013 | 462 | 0.446 |
| ENSP00000357231 | THEMIS          | 2.64E-05 | 0.013 | 374 | 0.341 |
| ENSP00000363836 | CCNY            | 2.32E-05 | 0.013 | 308 | 0.417 |
| ENSP00000405838 | HLA-DPA1        | 1.48E-05 | 0.013 | 173 | 0.380 |
| ENSP00000236147 | SELL            | 1.20E-04 | 0.014 | 899 | 0.752 |
| ENSP00000264708 | POMC            | 1.03E-04 | 0.014 | 977 | 0.636 |
| ENSP00000264033 | CBL             | 9.29E-05 | 0.014 | 999 | 0.634 |
| ENSP00000332124 | MRC1L1          | 8.87E-05 | 0.014 | 977 | 0.000 |
| ENSP00000364597 | PADI4           | 8.28E-05 | 0.014 | 752 | 0.387 |
| ENSP00000284240 | THY1            | 7.79E-05 | 0.014 | 659 | 0.503 |
| ENSP00000351602 | FUT4            | 5.79E-05 | 0.014 | 655 | 0.523 |
| ENSP00000284273 | UBASH3B         | 5.41E-05 | 0.014 | 713 | 0.188 |
| ENSP00000333919 | BTLA            | 5.07E-05 | 0.014 | 673 | 0.609 |
| ENSP00000266085 | TIMP3           | 4.84E-05 | 0.014 | 430 | 0.616 |
| ENSP00000293826 | TNFSF12-TNFSF13 | 4.62E-05 | 0.014 | 427 | 0.503 |
| ENSP00000308549 | ADORA1          | 4.37E-05 | 0.014 | 903 | 0.502 |
| ENSP00000252268 | DPF2            | 4.16E-05 | 0.014 | 229 | 0.251 |
| ENSP00000341327 | SOCS4           | 4.10E-05 | 0.014 | 938 | 0.366 |

|                 |          |          |       |     |       |
|-----------------|----------|----------|-------|-----|-------|
| ENSP00000350878 | S1PR3    | 3.88E-05 | 0.014 | 921 | 0.574 |
| ENSP00000221978 | NKG7     | 3.56E-05 | 0.014 | 702 | 0.524 |
| ENSP00000270800 | IL22RA1  | 3.54E-05 | 0.014 | 999 | 0.550 |
| ENSP00000353259 | CD300A   | 3.54E-05 | 0.014 | 366 | 0.389 |
| ENSP00000259633 | CD72     | 3.54E-05 | 0.014 | 471 | 0.562 |
| ENSP00000410481 | LTB      | 2.76E-05 | 0.014 | 340 | 0.503 |
| ENSP00000374791 | IGKV6-21 | 2.00E-05 | 0.014 | 204 | 0.401 |
| ENSP00000341803 | TCTEX1D4 | 1.43E-05 | 0.014 | 619 | 0.282 |
| ENSP00000322570 | POLE     | 1.49E-04 | 0.015 | 659 | 0.706 |
| ENSP00000355718 | DLL1     | 1.04E-04 | 0.015 | 940 | 0.763 |
| ENSP00000380227 | ITGA4    | 9.98E-05 | 0.015 | 900 | 0.688 |
| ENSP00000387122 | CLEC16A  | 8.43E-05 | 0.015 | 516 | 0.477 |
| ENSP00000329967 | TBK1     | 8.14E-05 | 0.015 | 994 | 0.610 |
| ENSP00000340396 | GBP5     | 7.73E-05 | 0.015 | 776 | 0.554 |
| ENSP00000304236 | CD14     | 7.53E-05 | 0.015 | 986 | 0.633 |
| ENSP00000399309 | NEU1     | 7.34E-05 | 0.015 | 567 | 0.459 |
| ENSP00000259808 | RIPK1    | 6.19E-05 | 0.015 | 998 | 0.648 |
| ENSP00000360891 | IFIT2    | 5.78E-05 | 0.015 | 927 | 0.565 |
| ENSP00000337759 | DOM3Z    | 5.78E-05 | 0.015 | 621 | 0.137 |
| ENSP00000315474 | GIMAP7   | 5.57E-05 | 0.015 | 832 | 0.607 |
| ENSP00000368226 | GK       | 5.04E-05 | 0.015 | 603 | 0.190 |
| ENSP00000399298 | HLA-DPB1 | 4.70E-05 | 0.015 | 296 | 0.734 |

|                 |          |          |       |     |       |
|-----------------|----------|----------|-------|-----|-------|
| ENSP00000397181 | RGS4     | 4.69E-05 | 0.015 | 902 | 0.468 |
| ENSP00000360730 | IL13RA1  | 4.65E-05 | 0.015 | 998 | 0.530 |
| ENSP00000276449 | STAR     | 4.64E-05 | 0.015 | 800 | 0.354 |
| ENSP00000405108 | HLA-DOB  | 4.53E-05 | 0.015 | 587 | 0.265 |
| ENSP00000264122 | CBLB     | 4.47E-05 | 0.015 | 899 | 0.429 |
| ENSP00000395780 | HLA-DOB  | 4.40E-05 | 0.015 | 587 | 0.265 |
| ENSP00000228740 | LTA4H    | 3.92E-05 | 0.015 | 384 | 0.339 |
| ENSP00000400626 | SKIV2L   | 3.67E-05 | 0.015 | 369 | 0.162 |
| ENSP00000336764 | OPRL1    | 3.53E-05 | 0.015 | 899 | 0.461 |
| ENSP00000357112 | AIM2     | 3.43E-05 | 0.015 | 829 | 0.694 |
| ENSP00000395102 | LTB      | 2.76E-05 | 0.015 | 340 | 0.503 |
| ENSP00000223795 | TNFSF8   | 2.61E-05 | 0.015 | 508 | 0.582 |
| ENSP00000351484 | NAALADL1 | 2.12E-05 | 0.015 | 502 | 0.395 |
| ENSP00000363768 | C1QC     | 1.06E-04 | 0.016 | 900 | 0.554 |
| ENSP00000307786 | CYCS     | 1.06E-04 | 0.016 | 905 | 0.753 |
| ENSP00000263125 | PRKCQ    | 8.62E-05 | 0.016 | 964 | 0.415 |
| ENSP00000327025 | RORC     | 7.49E-05 | 0.016 | 705 | 0.731 |
| ENSP00000364782 | NEU1     | 7.24E-05 | 0.016 | 609 | 0.459 |
| ENSP00000005180 | CCL26    | 6.91E-05 | 0.016 | 980 | 0.431 |
| ENSP00000368699 | ISG15    | 6.85E-05 | 0.016 | 932 | 0.591 |
| ENSP00000305416 | S1PR1    | 6.68E-05 | 0.016 | 946 | 0.601 |
| ENSP00000327336 | BGN      | 6.36E-05 | 0.016 | 958 | 0.552 |

|                 |         |          |       |     |       |
|-----------------|---------|----------|-------|-----|-------|
| ENSP00000397705 | HLA-F   | 6.26E-05 | 0.016 | 845 | 0.389 |
| ENSP00000254868 | CLEC10A | 5.68E-05 | 0.016 | 506 | 0.578 |
| ENSP00000328133 | IL20RB  | 5.17E-05 | 0.016 | 810 | 0.524 |
| ENSP00000340937 | COL17A1 | 4.32E-05 | 0.016 | 427 | 0.137 |
| ENSP00000378786 | HLA-DRA | 4.26E-05 | 0.016 | 866 | 0.654 |
| ENSP00000379651 | LILRA6  | 4.24E-05 | 0.016 | 427 | 0.566 |
| ENSP00000266003 | MLN     | 3.68E-05 | 0.016 | 899 | 0.489 |
| ENSP00000391879 | TRIM26  | 3.08E-05 | 0.016 | 294 | 0.323 |
| ENSP00000415328 | TRIM26  | 3.07E-05 | 0.016 | 294 | 0.323 |
| ENSP00000291744 | FCN2    | 2.00E-05 | 0.016 | 937 | 0.427 |
| ENSP00000346839 | FN1     | 1.69E-04 | 0.017 | 993 | 0.763 |
| ENSP00000277541 | NOTCH1  | 1.44E-04 | 0.017 | 997 | 0.797 |
| ENSP00000262539 | PTPN3   | 1.02E-04 | 0.017 | 927 | 0.692 |
| ENSP00000343428 | GPR18   | 9.05E-05 | 0.017 | 945 | 0.520 |
| ENSP00000304895 | IRS1    | 8.04E-05 | 0.017 | 999 | 0.685 |
| ENSP00000310127 | IRF3    | 7.87E-05 | 0.017 | 986 | 0.684 |
| ENSP00000298171 | TSHR    | 6.11E-05 | 0.017 | 939 | 0.401 |
| ENSP00000317327 | UBASH3A | 5.88E-05 | 0.017 | 636 | 0.225 |
| ENSP00000348793 | AFF3    | 5.71E-05 | 0.017 | 428 | 0.435 |
| ENSP00000351314 | PSMB10  | 5.63E-05 | 0.017 | 919 | 0.384 |
| ENSP00000398412 | MICB    | 5.62E-05 | 0.017 | 899 | 0.509 |
| ENSP00000347379 | OCLN    | 5.49E-05 | 0.017 | 920 | 0.493 |



|                 |        |          |       |     |       |
|-----------------|--------|----------|-------|-----|-------|
| ENSP00000244061 | RNF114 | 5.14E-05 | 0.017 | 401 | 0.312 |
| ENSP00000280200 | CD226  | 4.72E-05 | 0.017 | 333 | 0.514 |
| ENSP00000383503 | ZNRD1  | 4.37E-05 | 0.017 | 388 | 0.137 |
| ENSP00000228918 | LTBR   | 3.70E-05 | 0.017 | 845 | 0.604 |
| ENSP00000300571 | GPRC5B | 3.38E-05 | 0.017 | 200 | 0.208 |
| ENSP00000278888 | MS4A2  | 3.26E-05 | 0.017 | 540 | 0.580 |
| ENSP00000307259 | P2RY12 | 2.91E-05 | 0.017 | 900 | 0.501 |
| ENSP00000346892 | SERF1A | 2.65E-05 | 0.017 | 195 | 0.320 |
| ENSP00000262629 | TYROBP | 1.80E-04 | 0.018 | 933 | 0.687 |
| ENSP00000276414 | GNRH1  | 1.06E-04 | 0.018 | 901 | 0.518 |
| ENSP00000406878 | PSMB8  | 1.02E-04 | 0.018 | 910 | 0.321 |
| ENSP00000353940 | PMEL   | 6.64E-05 | 0.018 | 953 | 0.415 |
| ENSP00000384886 | IFI30  | 6.37E-05 | 0.018 | 922 | 0.477 |
| ENSP00000264972 | ZAP70  | 5.99E-05 | 0.018 | 967 | 0.545 |
| ENSP00000365817 | HLA-E  | 5.92E-05 | 0.018 | 896 | 0.707 |
| ENSP00000381129 | GRK4   | 5.02E-05 | 0.018 | 805 | 0.181 |
| ENSP00000348912 | ADAM33 | 4.12E-05 | 0.018 | 461 | 0.454 |
| ENSP00000410626 | PHRF1  | 3.98E-05 | 0.018 | 517 | 0.416 |
| ENSP00000338171 | SKAP1  | 3.87E-05 | 0.018 | 351 | 0.302 |
| ENSP00000373167 | TIGIT  | 3.84E-05 | 0.018 | 559 | 0.568 |
| ENSP00000258749 | AOAH   | 3.77E-05 | 0.018 | 601 | 0.648 |
| ENSP00000347314 | SPG20  | 3.67E-05 | 0.018 | 430 | 0.198 |

|                 |         |          |       |     |       |
|-----------------|---------|----------|-------|-----|-------|
| ENSP00000265857 | GET4    | 3.53E-05 | 0.018 | 318 | 0.506 |
| ENSP00000251377 | LILRA2  | 3.47E-05 | 0.018 | 336 | 0.458 |
| ENSP00000327647 | CRADD   | 2.86E-05 | 0.018 | 507 | 0.526 |
| ENSP00000411683 | TRIM15  | 2.54E-05 | 0.018 | 288 | 0.353 |
| ENSP00000385470 | TNFSF18 | 2.02E-05 | 0.018 | 720 | 0.443 |
| ENSP00000355865 | PARK2   | 9.40E-05 | 0.019 | 998 | 0.643 |
| ENSP00000236850 | APOA1   | 8.72E-05 | 0.019 | 764 | 0.609 |
| ENSP00000366124 | CST3    | 8.55E-05 | 0.019 | 651 | 0.504 |
| ENSP00000353224 | TFRC    | 8.50E-05 | 0.019 | 907 | 0.498 |
| ENSP00000351777 | VCP     | 8.24E-05 | 0.019 | 630 | 0.243 |
| ENSP00000361850 | PLAU    | 8.14E-05 | 0.019 | 922 | 0.717 |
| ENSP00000382819 | DOM3Z   | 5.80E-05 | 0.019 | 621 | 0.137 |
| ENSP00000303149 | GPR27   | 5.18E-05 | 0.019 | 319 | 0.219 |
| ENSP00000257570 | OASL    | 5.17E-05 | 0.019 | 910 | 0.298 |
| ENSP00000319279 | MALT1   | 4.78E-05 | 0.019 | 991 | 0.642 |
| ENSP00000354159 | NLRC4   | 4.65E-05 | 0.019 | 998 | 0.732 |
| ENSP00000357625 | BNIP3   | 4.22E-05 | 0.019 | 890 | 0.407 |
| ENSP00000371532 | VLDLR   | 3.71E-05 | 0.019 | 303 | 0.343 |
| ENSP00000295463 | ALPI    | 3.69E-05 | 0.019 | 621 | 0.143 |
| ENSP00000364543 | SKIV2L  | 3.68E-05 | 0.019 | 369 | 0.162 |
| ENSP00000305877 | NMUR1   | 3.52E-05 | 0.019 | 899 | 0.493 |
| ENSP00000395598 | TRIM10  | 3.15E-05 | 0.019 | 296 | 0.373 |

|                 |          |          |       |     |       |
|-----------------|----------|----------|-------|-----|-------|
| ENSP00000365884 | TRIM15   | 2.54E-05 | 0.019 | 288 | 0.353 |
| ENSP00000269394 | ZNF750   | 2.49E-05 | 0.019 | 425 | 0.463 |
| ENSP00000412897 | IFNA4    | 1.41E-05 | 0.019 | 430 | 0.464 |
| ENSP00000308938 | PLG      | 9.98E-05 | 0.02  | 977 | 0.684 |
| ENSP00000348812 | PTPRD    | 7.53E-05 | 0.02  | 767 | 0.540 |
| ENSP00000379330 | NFATC2   | 7.21E-05 | 0.02  | 999 | 0.543 |
| ENSP00000340292 | DLK1     | 5.03E-05 | 0.02  | 424 | 0.593 |
| ENSP00000338799 | IL6ST    | 5.02E-05 | 0.02  | 999 | 0.659 |
| ENSP00000416599 | ZNRD1    | 4.41E-05 | 0.02  | 388 | 0.137 |
| ENSP00000405636 | ZNRD1    | 4.18E-05 | 0.02  | 388 | 0.137 |
| ENSP00000309968 | ADAM17   | 4.11E-05 | 0.02  | 860 | 0.551 |
| ENSP00000393744 | PSMB9    | 3.64E-05 | 0.02  | 714 | 0.293 |
| ENSP00000363993 | PSMB9    | 3.62E-05 | 0.02  | 714 | 0.293 |
| ENSP00000372718 | HLA-DMB  | 1.62E-05 | 0.02  | 232 | 0.681 |
| ENSP00000413471 | HLA-DMB  | 1.60E-05 | 0.02  | 232 | 0.681 |
| ENSP00000363941 | HLA-DPA1 | 1.51E-05 | 0.02  | 173 | 0.380 |
| ENSP00000264998 | TF       | 1.22E-04 | 0.021 | 838 | 0.700 |
| ENSP00000356671 | SERPINC1 | 1.02E-04 | 0.021 | 991 | 0.640 |
| ENSP00000353731 | DPP4     | 7.56E-05 | 0.021 | 896 | 0.419 |
| ENSP00000258298 | TEX35    | 7.28E-05 | 0.021 | 891 | 0.311 |
| ENSP00000246115 | S1PR4    | 6.97E-05 | 0.021 | 971 | 0.605 |
| ENSP00000399388 | TCF19    | 6.17E-05 | 0.021 | 899 | 0.230 |

|                 |          |          |       |     |       |
|-----------------|----------|----------|-------|-----|-------|
| ENSP00000299663 | CLEC4E   | 4.41E-05 | 0.021 | 540 | 0.548 |
| ENSP00000348472 | PXK      | 4.41E-05 | 0.021 | 516 | 0.436 |
| ENSP00000242465 | SRGN     | 4.32E-05 | 0.021 | 900 | 0.393 |
| ENSP00000348888 | PIGR     | 4.16E-05 | 0.021 | 843 | 0.314 |
| ENSP00000293599 | AQP5     | 3.73E-05 | 0.021 | 879 | 0.470 |
| ENSP00000355136 | SORBS1   | 3.60E-05 | 0.021 | 424 | 0.193 |
| ENSP00000376765 | PIAS3    | 3.52E-05 | 0.021 | 997 | 0.388 |
| ENSP00000283243 | PLA2R1   | 3.19E-05 | 0.021 | 800 | 0.127 |
| ENSP00000325663 | NFKBIZ   | 3.15E-05 | 0.021 | 764 | 0.498 |
| ENSP00000410512 | HLA-DQB2 | 2.57E-05 | 0.021 | 733 | 0.294 |
| ENSP00000391938 | HLA-DQB2 | 2.57E-05 | 0.021 | 733 | 0.294 |
| ENSP00000371505 | CLEC6A   | 2.28E-05 | 0.021 | 613 | 0.524 |
| ENSP00000390224 | C1orf132 | 2.05E-05 | 0.021 | 245 | 0.000 |
| ENSP00000243213 | IL13RA2  | 2.03E-05 | 0.021 | 903 | 0.520 |
| ENSP00000221972 | CD79A    | 2.25E-04 | 0.022 | 886 | 0.790 |
| ENSP00000263642 | IFIH1    | 8.33E-05 | 0.022 | 792 | 0.649 |
| ENSP00000256646 | NOTCH2   | 6.88E-05 | 0.022 | 994 | 0.780 |
| ENSP00000268389 | IGSF6    | 6.12E-05 | 0.022 | 788 | 0.674 |
| ENSP00000303208 | PCSK9    | 5.49E-05 | 0.022 | 815 | 0.264 |
| ENSP00000332468 | TRAF3    | 5.23E-05 | 0.022 | 999 | 0.710 |
| ENSP00000302812 | SP7      | 4.97E-05 | 0.022 | 898 | 0.694 |
| ENSP00000348068 | SERPINA1 | 4.55E-05 | 0.022 | 909 | 0.544 |

|                 |           |          |       |     |       |
|-----------------|-----------|----------|-------|-----|-------|
| ENSP00000226840 | AADAT     | 4.53E-05 | 0.022 | 306 | 0.534 |
| ENSP00000237455 | RNF103    | 4.29E-05 | 0.022 | 285 | 0.173 |
| ENSP00000356530 | RNASEL    | 4.20E-05 | 0.022 | 914 | 0.452 |
| ENSP00000372726 | TAP2      | 3.62E-05 | 0.022 | 293 | 0.177 |
| ENSP00000264613 | CP        | 3.39E-05 | 0.022 | 659 | 0.556 |
| ENSP00000256906 | HRH4      | 3.34E-05 | 0.022 | 904 | 0.613 |
| ENSP00000331827 | TNFAIP8L1 | 3.04E-05 | 0.022 | 336 | 0.314 |
| ENSP00000263413 | C6        | 2.70E-05 | 0.022 | 214 | 0.329 |
| ENSP00000356385 | CFHR2     | 2.56E-05 | 0.022 | 188 | 0.465 |
| ENSP00000368349 | POLA1     | 1.57E-04 | 0.023 | 659 | 0.692 |
| ENSP00000272190 | REN       | 7.84E-05 | 0.023 | 906 | 0.632 |
| ENSP00000258317 | NPL       | 7.17E-05 | 0.023 | 462 | 0.362 |
| ENSP00000261254 | CCND2     | 6.36E-05 | 0.023 | 887 | 0.697 |
| ENSP00000341208 | STAT5A    | 6.19E-05 | 0.023 | 999 | 0.719 |
| ENSP00000221496 | AMH       | 5.70E-05 | 0.023 | 427 | 0.549 |
| ENSP00000340191 | FPR2      | 5.16E-05 | 0.023 | 920 | 0.615 |
| ENSP00000338812 | C1QTNF6   | 5.14E-05 | 0.023 | 800 | 0.429 |
| ENSP00000305133 | SOCS5     | 4.79E-05 | 0.023 | 993 | 0.417 |
| ENSP00000258381 | SP110     | 4.74E-05 | 0.023 | 385 | 0.475 |
| ENSP00000347032 | PIP4K2C   | 4.31E-05 | 0.023 | 308 | 0.261 |
| ENSP00000363571 | MUSK      | 4.11E-05 | 0.023 | 470 | 0.575 |
| ENSP00000364801 | HSPA1B    | 3.99E-05 | 0.023 | 340 | 0.399 |

|                 |          |          |       |     |       |
|-----------------|----------|----------|-------|-----|-------|
| ENSP00000382915 | HSPA1A   | 3.99E-05 | 0.023 | 340 | 0.603 |
| ENSP00000375391 | HSPA1B   | 3.99E-05 | 0.023 | 340 | 0.399 |
| ENSP00000375399 | HSPA1B   | 3.99E-05 | 0.023 | 340 | 0.399 |
| ENSP00000403530 | HSPA1B   | 3.99E-05 | 0.023 | 340 | 0.399 |
| ENSP00000365596 | GPR183   | 3.95E-05 | 0.023 | 729 | 0.640 |
| ENSP00000329380 | GP1BA    | 3.91E-05 | 0.023 | 390 | 0.314 |
| ENSP00000372881 | HSPA1L   | 3.84E-05 | 0.023 | 337 | 0.272 |
| ENSP00000408347 | HSPA1L   | 3.84E-05 | 0.023 | 337 | 0.272 |
| ENSP00000331111 | ZNRD1    | 3.68E-05 | 0.023 | 404 | 0.137 |
| ENSP00000262999 | UCP1     | 3.48E-05 | 0.023 | 894 | 0.410 |
| ENSP00000350198 | SSTR2    | 3.48E-05 | 0.023 | 900 | 0.511 |
| ENSP00000265572 | OPRK1    | 3.37E-05 | 0.023 | 900 | 0.467 |
| ENSP00000302517 | HLA-DRB3 | 3.27E-05 | 0.023 | 580 | 0.329 |
| ENSP00000354676 | OSTC     | 3.22E-05 | 0.023 | 542 | 0.448 |
| ENSP00000296503 | HMGB2    | 3.19E-05 | 0.023 | 300 | 0.331 |
| ENSP00000393958 | DHX16    | 3.10E-05 | 0.023 | 899 | 0.148 |
| ENSP00000343000 | IL19     | 2.99E-05 | 0.023 | 904 | 0.554 |
| ENSP00000360966 | SLC2A6   | 2.81E-05 | 0.023 | 165 | 0.133 |
| ENSP00000281092 | FER      | 1.53E-05 | 0.023 | 951 | 0.501 |
| ENSP00000347858 | XIAP     | 5.59E-05 | 0.024 | 999 | 0.678 |
| ENSP00000406797 | PSMB8    | 5.20E-05 | 0.024 | 463 | 0.321 |
| ENSP00000268704 | SPG7     | 4.80E-05 | 0.024 | 859 | 0.647 |

|                 |         |          |       |     |       |
|-----------------|---------|----------|-------|-----|-------|
| ENSP00000255427 | CHIT1   | 4.60E-05 | 0.024 | 385 | 0.156 |
| ENSP00000299642 | CLEC3A  | 4.30E-05 | 0.024 | 502 | 0.583 |
| ENSP00000357123 | MNDA    | 3.61E-05 | 0.024 | 506 | 0.512 |
| ENSP00000257254 | APLNR   | 3.31E-05 | 0.024 | 907 | 0.479 |
| ENSP00000329507 | CD300C  | 2.83E-05 | 0.024 | 328 | 0.273 |
| ENSP00000356189 | IPCEF1  | 2.72E-05 | 0.024 | 274 | 0.194 |
| ENSP00000384273 | RELA    | 2.00E-04 | 0.025 | 993 | 0.735 |
| ENSP00000357753 | IVL     | 8.86E-05 | 0.025 | 551 | 0.404 |
| ENSP00000338548 | FGF1    | 8.62E-05 | 0.025 | 854 | 0.787 |
| ENSP00000302269 | VAV1    | 8.51E-05 | 0.025 | 983 | 0.600 |
| ENSP00000351905 | TGFBR2  | 6.29E-05 | 0.025 | 997 | 0.691 |
| ENSP00000408617 | HDAC9   | 6.22E-05 | 0.025 | 942 | 0.643 |
| ENSP00000342070 | CTSB    | 5.75E-05 | 0.025 | 886 | 0.627 |
| ENSP00000286452 | KIF5A   | 4.96E-05 | 0.025 | 419 | 0.181 |
| ENSP00000255040 | APCS    | 4.80E-05 | 0.025 | 892 | 0.591 |
| ENSP00000362057 | NOX1    | 4.26E-05 | 0.025 | 851 | 0.483 |
| ENSP00000408907 | HSPA1A  | 4.07E-05 | 0.025 | 340 | 0.603 |
| ENSP00000360157 | FOXD3   | 4.01E-05 | 0.025 | 408 | 0.610 |
| ENSP00000279441 | MMP10   | 3.90E-05 | 0.025 | 888 | 0.460 |
| ENSP00000293897 | SSTR5   | 3.52E-05 | 0.025 | 902 | 0.488 |
| ENSP00000275015 | NFKBIE  | 3.10E-05 | 0.025 | 672 | 0.501 |
| ENSP00000296980 | IL22RA2 | 3.02E-05 | 0.025 | 997 | 0.383 |

|                 |         |          |       |     |       |
|-----------------|---------|----------|-------|-----|-------|
| ENSP00000287907 | HTR5A   | 2.97E-05 | 0.025 | 904 | 0.521 |
| ENSP00000265440 | TFEC    | 2.14E-05 | 0.025 | 601 | 0.442 |
| ENSP00000265171 | EGF     | 1.41E-04 | 0.026 | 993 | 0.793 |
| ENSP00000363976 | HLA-DMA | 1.04E-04 | 0.026 | 961 | 0.564 |
| ENSP00000358997 | IRAK1   | 7.99E-05 | 0.026 | 999 | 0.736 |
| ENSP00000406359 | HSPA1A  | 6.78E-05 | 0.026 | 918 | 0.603 |
| ENSP00000359490 | GBP4    | 5.97E-05 | 0.026 | 899 | 0.452 |
| ENSP00000335620 | GSTA1   | 5.75E-05 | 0.026 | 750 | 0.685 |
| ENSP00000257749 | BACH2   | 5.19E-05 | 0.026 | 460 | 0.288 |
| ENSP00000345344 | CTSL1   | 4.87E-05 | 0.026 | 996 | 0.544 |
| ENSP00000260302 | MMP13   | 4.57E-05 | 0.026 | 928 | 0.689 |
| ENSP00000356395 | CFHR3   | 4.49E-05 | 0.026 | 424 | 0.355 |
| ENSP00000271411 | POU2F1  | 4.36E-05 | 0.026 | 657 | 0.337 |
| ENSP00000412027 | PSMB9   | 3.68E-05 | 0.026 | 657 | 0.293 |
| ENSP00000403721 | CYP21A2 | 3.57E-05 | 0.026 | 409 | 0.199 |
| ENSP00000341828 | CHIA    | 3.55E-05 | 0.026 | 395 | 0.368 |
| ENSP00000299440 | RAG1    | 3.42E-05 | 0.026 | 543 | 0.576 |
| ENSP00000361467 | DLG5    | 3.28E-05 | 0.026 | 669 | 0.441 |
| ENSP00000267377 | SSTR1   | 3.23E-05 | 0.026 | 901 | 0.493 |
| ENSP00000295980 | IL17RE  | 3.15E-05 | 0.026 | 514 | 0.468 |
| ENSP00000217407 | LBP     | 3.03E-05 | 0.026 | 922 | 0.562 |
| ENSP00000222305 | USF2    | 2.66E-05 | 0.026 | 296 | 0.369 |



|                 |         |          |       |     |       |
|-----------------|---------|----------|-------|-----|-------|
| ENSP00000302924 | IL17D   | 2.12E-05 | 0.026 | 527 | 0.382 |
| ENSP00000352514 | RUNX2   | 1.82E-04 | 0.027 | 927 | 0.773 |
| ENSP00000351273 | CASP8   | 9.66E-05 | 0.027 | 999 | 0.821 |
| ENSP00000407195 | TAPBP   | 8.60E-05 | 0.027 | 896 | 0.280 |
| ENSP00000362463 | GLO1    | 6.06E-05 | 0.027 | 420 | 0.314 |
| ENSP00000341268 | TRADD   | 5.99E-05 | 0.027 | 999 | 0.664 |
| ENSP00000363081 | DKK1    | 5.36E-05 | 0.027 | 874 | 0.786 |
| ENSP00000307235 | EIF2AK3 | 4.51E-05 | 0.027 | 643 | 0.711 |
| ENSP00000308208 | MMP14   | 4.40E-05 | 0.027 | 894 | 0.679 |
| ENSP00000300184 | MS4A7   | 4.36E-05 | 0.027 | 707 | 0.746 |
| ENSP00000204615 | THPO    | 3.59E-05 | 0.027 | 901 | 0.652 |
| ENSP00000394942 | CYP21A2 | 3.38E-05 | 0.027 | 340 | 0.199 |
| ENSP00000390497 | TRIM10  | 3.16E-05 | 0.027 | 296 | 0.373 |
| ENSP00000278379 | SLC1A2  | 3.10E-05 | 0.027 | 877 | 0.205 |
| ENSP00000236826 | MMP8    | 3.05E-05 | 0.027 | 719 | 0.559 |
| ENSP00000362181 | NCR2    | 2.92E-05 | 0.027 | 424 | 0.576 |
| ENSP00000316228 | CLEC4M  | 2.72E-05 | 0.027 | 872 | 0.494 |
| ENSP00000233156 | TFPI    | 2.22E-05 | 0.027 | 927 | 0.640 |
| ENSP00000364512 | G6PC2   | 2.07E-05 | 0.027 | 569 | 0.143 |
| ENSP00000279804 | CTF1    | 1.97E-05 | 0.027 | 929 | 0.522 |
| ENSP00000274335 | PIK3R1  | 9.39E-05 | 0.028 | 999 | 0.624 |
| ENSP00000253408 | GFAP    | 7.66E-05 | 0.028 | 902 | 0.705 |

|                 |         |          |       |     |       |
|-----------------|---------|----------|-------|-----|-------|
| ENSP00000323929 | A2M     | 5.45E-05 | 0.028 | 929 | 0.635 |
| ENSP00000370880 | MLANA   | 5.44E-05 | 0.028 | 954 | 0.386 |
| ENSP00000312027 | CD7     | 5.33E-05 | 0.028 | 788 | 0.574 |
| ENSP00000231751 | LTF     | 5.20E-05 | 0.028 | 901 | 0.664 |
| ENSP00000008938 | PGLYRP1 | 5.14E-05 | 0.028 | 505 | 0.569 |
| ENSP00000348831 | NUDT10  | 4.49E-05 | 0.028 | 429 | 0.331 |
| ENSP00000307218 | NAT1    | 4.35E-05 | 0.028 | 514 | 0.441 |
| ENSP00000265394 | CPVL    | 4.29E-05 | 0.028 | 274 | 0.237 |
| ENSP00000221403 | DHDH    | 4.19E-05 | 0.028 | 562 | 0.261 |
| ENSP00000360216 | DNTT    | 4.08E-05 | 0.028 | 839 | 0.744 |
| ENSP00000341821 | FPR3    | 3.81E-05 | 0.028 | 918 | 0.573 |
| ENSP00000396813 | PSMB9   | 3.74E-05 | 0.028 | 657 | 0.293 |
| ENSP00000351706 | GK2     | 3.72E-05 | 0.028 | 247 | 0.354 |
| ENSP00000408860 | CYP21A2 | 3.38E-05 | 0.028 | 340 | 0.199 |
| ENSP00000375066 | HCAR2   | 3.33E-05 | 0.028 | 907 | 0.591 |
| ENSP00000297469 | GPER    | 3.23E-05 | 0.028 | 900 | 0.559 |
| ENSP00000305464 | APLN    | 3.05E-05 | 0.028 | 938 | 0.511 |
| ENSP00000389155 | ABHD16A | 3.03E-05 | 0.028 | 406 | 0.181 |
| ENSP00000377978 | CCL4L2  | 2.86E-05 | 0.028 | 482 | 0.534 |
| ENSP00000342520 | IL17REL | 2.26E-05 | 0.028 | 310 | 0.482 |
| ENSP00000317980 | IGSF9B  | 1.71E-05 | 0.028 | 201 | 0.343 |
| ENSP00000263733 | FAM20B  | 1.61E-05 | 0.028 | 201 | 0.221 |

|                 |           |          |       |     |       |
|-----------------|-----------|----------|-------|-----|-------|
| ENSP00000397139 | HLA-DPA1  | 1.51E-05 | 0.028 | 173 | 0.380 |
| ENSP00000215781 | OSM       | 6.14E-05 | 0.029 | 981 | 0.711 |
| ENSP00000356430 | RGS18     | 5.60E-05 | 0.029 | 955 | 0.654 |
| ENSP00000366525 | FTL       | 5.60E-05 | 0.029 | 906 | 0.520 |
| ENSP00000085219 | CD22      | 5.50E-05 | 0.029 | 712 | 0.624 |
| ENSP00000265371 | NRP1      | 5.50E-05 | 0.029 | 901 | 0.654 |
| ENSP00000368880 | FOXO1     | 5.29E-05 | 0.029 | 988 | 0.646 |
| ENSP00000348089 | ERCC6     | 5.21E-05 | 0.029 | 528 | 0.165 |
| ENSP00000245222 | SPHK2     | 4.89E-05 | 0.029 | 901 | 0.161 |
| ENSP00000381793 | GRB10     | 4.80E-05 | 0.029 | 800 | 0.706 |
| ENSP00000363512 | ALOX5     | 4.69E-05 | 0.029 | 877 | 0.568 |
| ENSP00000263056 | MAP3K8    | 3.91E-05 | 0.029 | 707 | 0.586 |
| ENSP00000312455 | CFLAR     | 3.70E-05 | 0.029 | 872 | 0.573 |
| ENSP00000372599 | TAP2      | 3.65E-05 | 0.029 | 293 | 0.177 |
| ENSP00000357906 | TNFAIP8L2 | 3.52E-05 | 0.029 | 581 | 0.644 |
| ENSP00000333779 | EVI2B     | 3.45E-05 | 0.029 | 498 | 0.512 |
| ENSP00000261187 | SLC16A7   | 2.59E-05 | 0.029 | 841 | 0.115 |
| ENSP00000404450 | LTB       | 1.93E-05 | 0.029 | 340 | 0.503 |
| ENSP00000286301 | CSF1R     | 1.04E-04 | 0.03  | 907 | 0.678 |
| ENSP00000282561 | GJA1      | 7.49E-05 | 0.03  | 905 | 0.577 |
| ENSP00000289473 | NCF1      | 6.06E-05 | 0.03  | 621 | 0.498 |
| ENSP00000313875 | CD46      | 5.75E-05 | 0.03  | 868 | 0.527 |

|                 |         |          |       |     |       |
|-----------------|---------|----------|-------|-----|-------|
| ENSP00000211122 | GSTA3   | 5.48E-05 | 0.03  | 675 | 0.697 |
| ENSP00000414905 | HLA-F   | 5.12E-05 | 0.03  | 551 | 0.389 |
| ENSP00000246553 | FFAR1   | 4.02E-05 | 0.03  | 899 | 0.529 |
| ENSP00000359643 | LPAR3   | 3.94E-05 | 0.03  | 899 | 0.502 |
| ENSP00000355797 | TCP10L2 | 3.68E-05 | 0.03  | 238 | 0.325 |
| ENSP00000314897 | ANGPT2  | 3.38E-05 | 0.03  | 867 | 0.716 |
| ENSP00000227163 | SPI1    | 3.38E-05 | 0.03  | 859 | 0.521 |
| ENSP00000356251 | GPR37L1 | 3.32E-05 | 0.03  | 201 | 0.281 |
| ENSP00000263119 | CABIN1  | 3.21E-05 | 0.03  | 461 | 0.410 |
| ENSP00000327513 | CSF1    | 3.09E-05 | 0.03  | 769 | 0.644 |
| ENSP00000339377 | NPY5R   | 2.89E-05 | 0.03  | 899 | 0.486 |
| ENSP00000248244 | TICAM1  | 2.77E-05 | 0.03  | 978 | 0.642 |
| ENSP00000365431 | TCF19   | 2.68E-05 | 0.03  | 523 | 0.230 |
| ENSP00000295755 | RETNLB  | 2.36E-05 | 0.03  | 411 | 0.529 |
| ENSP00000416448 | HLA-DOA | 2.26E-05 | 0.03  | 806 | 0.249 |
| ENSP00000378856 | LGALS9  | 2.21E-05 | 0.03  | 517 | 0.422 |
| ENSP00000360141 | GNAS    | 9.05E-05 | 0.031 | 462 | 0.345 |
| ENSP00000282091 | PTH     | 8.20E-05 | 0.031 | 926 | 0.585 |
| ENSP00000268035 | IGF1R   | 7.09E-05 | 0.031 | 825 | 0.712 |
| ENSP00000356708 | OLIG3   | 6.09E-05 | 0.031 | 542 | 0.435 |
| ENSP00000420168 | GSTA2   | 5.52E-05 | 0.031 | 750 | 0.690 |
| ENSP00000386161 | WWOX    | 5.04E-05 | 0.031 | 864 | 0.410 |

|                 |        |          |       |     |       |
|-----------------|--------|----------|-------|-----|-------|
| ENSP00000285850 | SLC7A7 | 4.29E-05 | 0.031 | 653 | 0.558 |
| ENSP00000383953 | RGS6   | 2.86E-05 | 0.031 | 899 | 0.487 |
| ENSP00000297904 | FIGF   | 2.51E-05 | 0.031 | 908 | 0.660 |
| ENSP00000227348 | CRTAM  | 2.33E-05 | 0.031 | 526 | 0.432 |
| ENSP00000299694 | BEAN1  | 1.54E-05 | 0.031 | 260 | 0.191 |
| ENSP00000261405 | VWF    | 9.53E-05 | 0.032 | 752 | 0.689 |
| ENSP00000343957 | IFNAR2 | 6.47E-05 | 0.032 | 976 | 0.690 |
| ENSP00000347988 | NDUFA5 | 6.43E-05 | 0.032 | 609 | 0.191 |
| ENSP00000361965 | ADA    | 5.41E-05 | 0.032 | 526 | 0.377 |
| ENSP00000298902 | IFI27  | 4.29E-05 | 0.032 | 922 | 0.267 |
| ENSP00000289707 | SLAMF8 | 4.29E-05 | 0.032 | 649 | 0.660 |
| ENSP00000272644 | GPR17  | 3.84E-05 | 0.032 | 901 | 0.509 |
| ENSP00000302324 | RNASE3 | 3.75E-05 | 0.032 | 540 | 0.488 |
| ENSP00000379500 | UEVLD  | 3.42E-05 | 0.032 | 429 | 0.206 |
| ENSP00000262630 | ZBTB32 | 3.16E-05 | 0.032 | 493 | 0.426 |
| ENSP00000294984 | IL24   | 3.14E-05 | 0.032 | 899 | 0.390 |
| ENSP00000360215 | ZBP1   | 3.06E-05 | 0.032 | 425 | 0.592 |
| ENSP00000370935 | CSF2RA | 2.82E-05 | 0.032 | 944 | 0.551 |
| ENSP00000353238 | SPN    | 2.79E-05 | 0.032 | 745 | 0.427 |
| ENSP00000278070 | PPRC1  | 2.31E-05 | 0.032 | 251 | 0.126 |
| ENSP00000386341 | TICAM2 | 2.05E-05 | 0.032 | 999 | 0.609 |
| ENSP00000270202 | AKT1   | 2.45E-04 | 0.033 | 994 | 0.659 |

|                 |          |          |       |     |       |
|-----------------|----------|----------|-------|-----|-------|
| ENSP00000304736 | ELOVL6   | 1.20E-04 | 0.033 | 794 | 0.308 |
| ENSP00000264498 | FGF2     | 9.10E-05 | 0.033 | 926 | 0.765 |
| ENSP00000312999 | GNAI2    | 8.44E-05 | 0.033 | 967 | 0.448 |
| ENSP00000302564 | BCL2L1   | 7.45E-05 | 0.033 | 930 | 0.725 |
| ENSP00000359998 | GSTA4    | 5.63E-05 | 0.033 | 730 | 0.696 |
| ENSP00000300289 | PDIA3    | 5.03E-05 | 0.033 | 965 | 0.149 |
| ENSP00000247470 | PYCARD   | 4.97E-05 | 0.033 | 987 | 0.724 |
| ENSP00000373614 | SELPLG   | 4.90E-05 | 0.033 | 563 | 0.591 |
| ENSP00000262741 | PIK3R3   | 4.81E-05 | 0.033 | 899 | 0.434 |
| ENSP00000379908 | ICA1     | 4.31E-05 | 0.033 | 327 | 0.325 |
| ENSP00000357066 | ARG1     | 4.29E-05 | 0.033 | 881 | 0.476 |
| ENSP00000405306 | NCR3     | 3.96E-05 | 0.033 | 361 | 0.471 |
| ENSP00000389071 | NCR3     | 3.96E-05 | 0.033 | 361 | 0.471 |
| ENSP00000297450 | ANGPT1   | 3.52E-05 | 0.033 | 877 | 0.714 |
| ENSP00000356791 | DPT      | 3.22E-05 | 0.033 | 800 | 0.250 |
| ENSP00000363643 | P2RY4    | 3.08E-05 | 0.033 | 899 | 0.503 |
| ENSP00000398224 | TRIM15   | 2.91E-05 | 0.033 | 357 | 0.353 |
| ENSP00000244174 | IL9R     | 2.81E-05 | 0.033 | 860 | 0.529 |
| ENSP00000310814 | STARD6   | 2.50E-05 | 0.033 | 168 | 0.169 |
| ENSP00000364858 | CARD16   | 2.38E-05 | 0.033 | 958 | 0.471 |
| ENSP00000358031 | C1orf138 | 1.48E-05 | 0.033 | 899 | 0.485 |
| ENSP00000309845 | HRAS     | 2.74E-04 | 0.034 | 948 | 0.778 |

|                 |         |          |       |     |       |
|-----------------|---------|----------|-------|-----|-------|
| ENSP00000353483 | MAPK8   | 1.03E-04 | 0.034 | 925 | 0.847 |
| ENSP00000261267 | LYZ     | 9.25E-05 | 0.034 | 611 | 0.623 |
| ENSP00000271324 | CD53    | 7.08E-05 | 0.034 | 747 | 0.539 |
| ENSP00000359174 | SLC35A3 | 5.66E-05 | 0.034 | 899 | 0.069 |
| ENSP00000264716 | FOSL2   | 4.29E-05 | 0.034 | 397 | 0.397 |
| ENSP00000310405 | XCR1    | 3.93E-05 | 0.034 | 899 | 0.591 |
| ENSP00000238607 | PGF     | 3.64E-05 | 0.034 | 884 | 0.724 |
| ENSP00000234961 | OPRD1   | 3.59E-05 | 0.034 | 931 | 0.434 |
| ENSP00000357113 | IFI16   | 3.35E-05 | 0.034 | 902 | 0.431 |
| ENSP00000319308 | RGS5    | 3.23E-05 | 0.034 | 800 | 0.288 |
| ENSP00000317337 | CD300LB | 2.94E-05 | 0.034 | 368 | 0.242 |
| ENSP00000349003 | PTGER3  | 2.92E-05 | 0.034 | 902 | 0.520 |
| ENSP00000329684 | GALR2   | 2.88E-05 | 0.034 | 899 | 0.518 |
| ENSP00000364217 | AGER    | 2.85E-05 | 0.034 | 889 | 0.605 |
| ENSP00000253699 | ZFYVE20 | 2.80E-05 | 0.034 | 528 | 0.114 |
| ENSP00000386588 | RGPD3   | 2.51E-05 | 0.034 | 540 | 0.307 |
| ENSP00000358188 | NBPF15  | 1.20E-05 | 0.034 | 374 | 0.262 |
| ENSP00000256078 | KRAS    | 1.03E-04 | 0.035 | 825 | 0.721 |
| ENSP00000218388 | TIMP1   | 9.14E-05 | 0.035 | 934 | 0.725 |
| ENSP00000222390 | HGF     | 8.51E-05 | 0.035 | 941 | 0.788 |
| ENSP00000357731 | LOR     | 8.06E-05 | 0.035 | 469 | 0.365 |
| ENSP00000353393 | F8      | 5.78E-05 | 0.035 | 913 | 0.652 |

|                 |         |          |       |     |       |
|-----------------|---------|----------|-------|-----|-------|
| ENSP00000264664 | FGF10   | 5.37E-05 | 0.035 | 867 | 0.792 |
| ENSP00000410443 | HLA-DRA | 5.22E-05 | 0.035 | 822 | 0.654 |
| ENSP00000355988 | IRF6    | 4.99E-05 | 0.035 | 955 | 0.480 |
| ENSP00000404619 | PRRC2A  | 4.99E-05 | 0.035 | 362 | 0.208 |
| ENSP00000222139 | EPOR    | 4.71E-05 | 0.035 | 999 | 0.619 |
| ENSP00000265643 | GAL     | 4.60E-05 | 0.035 | 904 | 0.455 |
| ENSP00000414817 | HLA-DMB | 4.25E-05 | 0.035 | 836 | 0.681 |
| ENSP00000384665 | LPAR2   | 4.07E-05 | 0.035 | 926 | 0.525 |
| ENSP00000364805 | HSPA1L  | 3.89E-05 | 0.035 | 337 | 0.272 |
| ENSP00000366061 | NMS     | 3.86E-05 | 0.035 | 901 | 0.461 |
| ENSP00000379566 | CCHCR1  | 3.14E-05 | 0.035 | 462 | 0.271 |
| ENSP00000259075 | TANK    | 3.00E-05 | 0.035 | 418 | 0.616 |
| ENSP00000380150 | CARD11  | 2.89E-05 | 0.035 | 913 | 0.545 |
| ENSP00000395497 | GTF2H4  | 2.75E-05 | 0.035 | 408 | 0.120 |
| ENSP00000256733 | SAA2    | 2.18E-05 | 0.035 | 788 | 0.528 |
| ENSP00000320168 | NUCB2   | 2.04E-05 | 0.035 | 844 | 0.114 |
| ENSP00000272324 | REG3G   | 1.59E-05 | 0.035 | 675 | 0.238 |
| ENSP00000358016 | SCML4   | 1.07E-05 | 0.035 | 179 | 0.407 |
| ENSP00000247461 | CANX    | 8.95E-05 | 0.036 | 939 | 0.290 |
| ENSP00000360876 | IFIT3   | 5.06E-05 | 0.036 | 912 | 0.507 |
| ENSP00000363804 | KLF4    | 4.91E-05 | 0.036 | 434 | 0.683 |
| ENSP00000308782 | GP6     | 3.97E-05 | 0.036 | 630 | 0.422 |



|                 |           |          |       |     |       |
|-----------------|-----------|----------|-------|-----|-------|
| ENSP00000367086 | ACOT7     | 3.36E-05 | 0.036 | 899 | 0.134 |
| ENSP00000339952 | KSR2      | 3.31E-05 | 0.036 | 336 | 0.086 |
| ENSP00000403628 | CCHCR1    | 3.05E-05 | 0.036 | 460 | 0.271 |
| ENSP00000313661 | HTR1D     | 2.90E-05 | 0.036 | 899 | 0.471 |
| ENSP00000339637 | BRAT1     | 2.48E-05 | 0.036 | 168 | 0.328 |
| ENSP00000412297 | PPP1R11   | 2.37E-05 | 0.036 | 430 | 0.283 |
| ENSP00000365692 | PIM2      | 1.70E-05 | 0.036 | 828 | 0.315 |
| ENSP00000368914 | PSTPIP1   | 5.05E-05 | 0.037 | 995 | 0.401 |
| ENSP00000390120 | LILRA6    | 4.09E-05 | 0.037 | 410 | 0.566 |
| ENSP00000342112 | LMO7      | 3.41E-05 | 0.037 | 230 | 0.129 |
| ENSP00000332591 | NPY2R     | 3.02E-05 | 0.037 | 903 | 0.511 |
| ENSP00000301908 | PNOC      | 3.00E-05 | 0.037 | 905 | 0.495 |
| ENSP00000255008 | SSTR4     | 2.91E-05 | 0.037 | 900 | 0.498 |
| ENSP00000309103 | BAD       | 2.87E-05 | 0.037 | 946 | 0.521 |
| ENSP00000229922 | CAP2      | 2.56E-05 | 0.037 | 378 | 0.107 |
| ENSP00000291232 | TNFRSF13C | 2.53E-05 | 0.037 | 517 | 0.571 |
| ENSP00000410390 | HLA-DOB   | 2.26E-05 | 0.037 | 810 | 0.265 |
| ENSP00000393667 | FAM126B   | 1.92E-05 | 0.037 | 238 | 0.219 |
| ENSP00000321203 | TNIP2     | 1.64E-05 | 0.037 | 992 | 0.564 |
| ENSP00000354558 | MTOR      | 9.39E-05 | 0.038 | 998 | 0.763 |
| ENSP00000312286 | PLA2G1B   | 6.96E-05 | 0.038 | 921 | 0.669 |
| ENSP00000230990 | HBEGF     | 5.83E-05 | 0.038 | 947 | 0.726 |

|                 |          |          |       |     |       |
|-----------------|----------|----------|-------|-----|-------|
| ENSP00000268058 | PML      | 5.81E-05 | 0.038 | 906 | 0.576 |
| ENSP00000357697 | S100A2   | 5.04E-05 | 0.038 | 899 | 0.114 |
| ENSP00000294507 | LAPTM5   | 4.57E-05 | 0.038 | 650 | 0.485 |
| ENSP00000295981 | IL17RC   | 3.58E-05 | 0.038 | 950 | 0.470 |
| ENSP00000265447 | ANXA11   | 3.28E-05 | 0.038 | 361 | 0.257 |
| ENSP00000386069 | ADRA2C   | 2.94E-05 | 0.038 | 899 | 0.470 |
| ENSP00000368538 | TNFRSF4  | 2.78E-05 | 0.038 | 901 | 0.498 |
| ENSP00000308774 | BMX      | 2.55E-05 | 0.038 | 959 | 0.373 |
| ENSP00000338260 | APOL4    | 1.90E-05 | 0.038 | 263 | 0.137 |
| ENSP00000366234 | IL31     | 1.88E-05 | 0.038 | 424 | 0.521 |
| ENSP00000250377 | KIAA0391 | 1.50E-05 | 0.038 | 195 | 0.109 |
| ENSP00000228280 | KITLG    | 9.60E-05 | 0.039 | 958 | 0.810 |
| ENSP00000226359 | AFP      | 6.65E-05 | 0.039 | 624 | 0.349 |
| ENSP00000239938 | EGR1     | 6.39E-05 | 0.039 | 904 | 0.709 |
| ENSP00000404524 | HSPA1A   | 6.22E-05 | 0.039 | 911 | 0.603 |
| ENSP00000393087 | HSPA1B   | 5.77E-05 | 0.039 | 430 | 0.399 |
| ENSP00000387477 | PRRC2A   | 5.03E-05 | 0.039 | 362 | 0.208 |
| ENSP00000351997 | MAP2K6   | 5.01E-05 | 0.039 | 933 | 0.662 |
| ENSP00000244709 | TREM1    | 3.48E-05 | 0.039 | 493 | 0.601 |
| ENSP00000359540 | CREG1    | 3.20E-05 | 0.039 | 463 | 0.218 |
| ENSP00000264501 | KIAA1109 | 3.07E-05 | 0.039 | 420 | 0.375 |
| ENSP00000302227 | CCBL1    | 3.01E-05 | 0.039 | 290 | 0.470 |

|                 |           |          |       |     |       |
|-----------------|-----------|----------|-------|-----|-------|
| ENSP00000299727 | GALR1     | 2.92E-05 | 0.039 | 900 | 0.495 |
| ENSP00000307766 | HTR1E     | 2.90E-05 | 0.039 | 900 | 0.512 |
| ENSP00000257622 | POM121    | 2.58E-05 | 0.039 | 196 | 0.166 |
| ENSP00000262305 | RAB11FIP3 | 2.39E-05 | 0.039 | 899 | 0.228 |
| ENSP00000391349 | DOM3Z     | 5.79E-05 | 0.04  | 621 | 0.137 |
| ENSP00000363435 | ITPR3     | 5.56E-05 | 0.04  | 366 | 0.345 |
| ENSP00000303532 | DEFB4A    | 5.39E-05 | 0.04  | 979 | 0.631 |
| ENSP00000028008 | RNASET2   | 5.16E-05 | 0.04  | 462 | 0.147 |
| ENSP00000381607 | GSTP1     | 4.72E-05 | 0.04  | 664 | 0.562 |
| ENSP00000415481 | PROM1     | 4.36E-05 | 0.04  | 865 | 0.697 |
| ENSP00000373477 | GPX3      | 4.17E-05 | 0.04  | 882 | 0.369 |
| ENSP00000371341 | TNK2      | 3.67E-05 | 0.04  | 645 | 0.532 |
| ENSP00000289429 | CD1A      | 3.65E-05 | 0.04  | 385 | 0.430 |
| ENSP00000358730 | ADORA3    | 3.65E-05 | 0.04  | 907 | 0.573 |
| ENSP00000351901 | CARD8     | 3.08E-05 | 0.04  | 993 | 0.788 |
| ENSP00000391181 | CCHCR1    | 2.98E-05 | 0.04  | 462 | 0.271 |
| ENSP00000370126 | SERF1B    | 2.98E-05 | 0.04  | 196 | 0.193 |
| ENSP00000358099 | RGS10     | 2.90E-05 | 0.04  | 900 | 0.515 |
| ENSP00000328364 | MAFA      | 1.79E-05 | 0.04  | 338 | 0.243 |
| ENSP00000359291 | ZNF185    | 1.66E-05 | 0.04  | 825 | 0.435 |
| ENSP00000369558 | IFNA6     | 1.49E-05 | 0.04  | 910 | 0.474 |
| ENSP00000365663 | NPPA      | 6.64E-05 | 0.041 | 919 | 0.538 |

|                 |        |          |       |     |       |
|-----------------|--------|----------|-------|-----|-------|
| ENSP00000386187 | IFITM1 | 4.51E-05 | 0.041 | 916 | 0.343 |
| ENSP00000365775 | MTHFR  | 3.93E-05 | 0.041 | 867 | 0.459 |
| ENSP00000278927 | ESAM   | 3.92E-05 | 0.041 | 854 | 0.563 |
| ENSP00000216629 | BDKRB1 | 3.60E-05 | 0.041 | 901 | 0.495 |
| ENSP00000342560 | HRH3   | 3.18E-05 | 0.041 | 899 | 0.512 |
| ENSP00000356658 | GPR52  | 3.10E-05 | 0.041 | 176 | 0.326 |
| ENSP00000260061 | LRRC32 | 2.95E-05 | 0.041 | 380 | 0.222 |
| ENSP00000224600 | RBP3   | 2.79E-05 | 0.041 | 462 | 0.298 |
| ENSP00000351650 | NUDT3  | 2.20E-05 | 0.041 | 395 | 0.000 |
| ENSP00000302961 | HSPA4  | 1.04E-04 | 0.042 | 962 | 0.635 |
| ENSP00000318902 | FOXP1  | 4.62E-05 | 0.042 | 326 | 0.437 |
| ENSP00000229319 | LDHB   | 4.25E-05 | 0.042 | 425 | 0.178 |
| ENSP00000361202 | IRS4   | 3.83E-05 | 0.042 | 437 | 0.351 |
| ENSP00000375893 | GPR55  | 3.19E-05 | 0.042 | 899 | 0.516 |
| ENSP00000350348 | GRM7   | 3.11E-05 | 0.042 | 336 | 0.104 |
| ENSP00000359512 | GBP3   | 2.45E-05 | 0.042 | 556 | 0.447 |
| ENSP00000388794 | CD177  | 1.97E-05 | 0.042 | 500 | 0.257 |
| ENSP00000225371 | EPX    | 1.73E-05 | 0.042 | 514 | 0.529 |
| ENSP00000318480 | YME1L1 | 6.93E-05 | 0.043 | 659 | 0.513 |
| ENSP00000327048 | MAF    | 5.15E-05 | 0.043 | 829 | 0.508 |
| ENSP00000357153 | CD1D   | 4.94E-05 | 0.043 | 846 | 0.635 |
| ENSP00000359245 | ABCA4  | 4.54E-05 | 0.043 | 430 | 0.082 |

|                 |          |          |       |     |       |
|-----------------|----------|----------|-------|-----|-------|
| ENSP00000360626 | KCNG1    | 4.27E-05 | 0.043 | 176 | 0.174 |
| ENSP00000329991 | IFNL1    | 3.72E-05 | 0.043 | 425 | 0.691 |
| ENSP00000329468 | ADAP2    | 3.57E-05 | 0.043 | 517 | 0.615 |
| ENSP00000263734 | EPAS1    | 3.25E-05 | 0.043 | 336 | 0.483 |
| ENSP00000342513 | IFI6     | 3.06E-05 | 0.043 | 918 | 0.284 |
| ENSP00000332504 | CCR10    | 2.86E-05 | 0.043 | 918 | 0.799 |
| ENSP00000384432 | ICOSLG   | 2.63E-05 | 0.043 | 563 | 0.472 |
| ENSP00000394494 | IFNA13   | 2.54E-05 | 0.043 | 374 | 0.512 |
| ENSP00000237380 | MED28    | 2.43E-05 | 0.043 | 427 | 0.527 |
| ENSP00000371872 | SLC35G5  | 1.46E-05 | 0.043 | 409 | 0.207 |
| ENSP00000292778 | YDJC     | 1.22E-05 | 0.043 | 340 | 0.175 |
| ENSP00000342295 | ANKRD55  | 1.04E-05 | 0.043 | 263 | 0.343 |
| ENSP00000350941 | SRC      | 1.99E-04 | 0.044 | 999 | 0.772 |
| ENSP00000381237 | HM13     | 4.83E-05 | 0.044 | 822 | 0.064 |
| ENSP00000252818 | JUND     | 4.32E-05 | 0.044 | 984 | 0.593 |
| ENSP00000351755 | LPAR1    | 4.13E-05 | 0.044 | 902 | 0.495 |
| ENSP00000370912 | TEC      | 3.97E-05 | 0.044 | 988 | 0.629 |
| ENSP00000415786 | SERPINE2 | 3.79E-05 | 0.044 | 437 | 0.413 |
| ENSP00000268763 | KSR1     | 3.57E-05 | 0.044 | 336 | 0.346 |
| ENSP00000362613 | CDX4     | 3.42E-05 | 0.044 | 252 | 0.371 |
| ENSP00000310117 | PPP1R14B | 3.28E-05 | 0.044 | 238 | 0.172 |
| ENSP00000401980 | MAVS     | 3.21E-05 | 0.044 | 729 | 0.659 |

|                 |         |          |       |     |       |
|-----------------|---------|----------|-------|-----|-------|
| ENSP00000339186 | GRAP2   | 2.96E-05 | 0.044 | 919 | 0.421 |
| ENSP00000224181 | C8G     | 2.76E-05 | 0.044 | 297 | 0.288 |
| ENSP00000300659 | NFATC3  | 2.66E-05 | 0.044 | 969 | 0.329 |
| ENSP00000262290 | LPO     | 2.45E-05 | 0.044 | 380 | 0.495 |
| ENSP00000269571 | ERBB2   | 1.15E-04 | 0.045 | 995 | 0.786 |
| ENSP00000307713 | BDKRB2  | 3.80E-05 | 0.045 | 901 | 0.493 |
| ENSP00000280155 | ADRA2A  | 3.25E-05 | 0.045 | 905 | 0.445 |
| ENSP00000205143 | DLL3    | 1.85E-05 | 0.045 | 913 | 0.666 |
| ENSP00000295897 | ALB     | 3.48E-04 | 0.046 | 968 | 0.774 |
| ENSP00000338983 | MUC1    | 6.56E-05 | 0.046 | 866 | 0.497 |
| ENSP00000314709 | ZHX2    | 4.81E-05 | 0.046 | 916 | 0.762 |
| ENSP00000271651 | CTSK    | 4.58E-05 | 0.046 | 899 | 0.525 |
| ENSP00000370408 | CDX2    | 4.23E-05 | 0.046 | 858 | 0.660 |
| ENSP00000264192 | CYTIP   | 4.07E-05 | 0.046 | 574 | 0.485 |
| ENSP00000327191 | CCT6B   | 4.02E-05 | 0.046 | 243 | 0.197 |
| ENSP00000233202 | SLC11A1 | 3.98E-05 | 0.046 | 422 | 0.546 |
| ENSP00000408453 | HLA-DMB | 3.94E-05 | 0.046 | 440 | 0.681 |
| ENSP00000199280 | AQP2    | 3.65E-05 | 0.046 | 421 | 0.291 |
| ENSP00000263798 | TYRO3   | 3.57E-05 | 0.046 | 817 | 0.653 |
| ENSP00000233954 | IL1RL1  | 3.32E-05 | 0.046 | 330 | 0.569 |
| ENSP00000354652 | NPY1R   | 3.25E-05 | 0.046 | 904 | 0.519 |
| ENSP00000263437 | NLRP2   | 2.52E-05 | 0.046 | 732 | 0.796 |

|                 |          |          |       |     |       |
|-----------------|----------|----------|-------|-----|-------|
| ENSP00000340019 | HSPD1    | 6.61E-05 | 0.047 | 978 | 0.445 |
| ENSP00000222330 | GSK3A    | 4.57E-05 | 0.047 | 411 | 0.488 |
| ENSP00000347948 | TNFRSF14 | 4.41E-05 | 0.047 | 464 | 0.377 |
| ENSP00000369299 | TRIM22   | 4.26E-05 | 0.047 | 577 | 0.483 |
| ENSP00000369858 | ALOX5AP  | 3.85E-05 | 0.047 | 576 | 0.537 |
| ENSP00000363596 | CNR2     | 3.34E-05 | 0.047 | 274 | 0.216 |
| ENSP00000276914 | PLIN2    | 3.04E-05 | 0.047 | 861 | 0.311 |
| ENSP00000318142 | FUT7     | 2.81E-05 | 0.047 | 469 | 0.348 |
| ENSP00000365233 | TPP2     | 2.81E-05 | 0.047 | 718 | 0.445 |
| ENSP00000347427 | MINK1    | 2.78E-05 | 0.047 | 424 | 0.223 |
| ENSP00000357122 | PYHIN1   | 2.78E-05 | 0.047 | 462 | 0.331 |
| ENSP00000255476 | RFXAP    | 2.64E-05 | 0.047 | 306 | 0.229 |
| ENSP00000369531 | UBQLNL   | 2.62E-05 | 0.047 | 318 | 0.245 |
| ENSP00000344844 | HAVCR1   | 2.09E-05 | 0.047 | 429 | 0.347 |
| ENSP00000360560 | TCTE1    | 2.05E-05 | 0.047 | 297 | 0.145 |
| ENSP00000242152 | NPY      | 6.11E-05 | 0.048 | 917 | 0.496 |
| ENSP00000220003 | CSK      | 4.59E-05 | 0.048 | 950 | 0.524 |
| ENSP00000370115 | SERPINB1 | 4.29E-05 | 0.048 | 522 | 0.656 |
| ENSP00000344218 | C1orf162 | 3.21E-05 | 0.048 | 611 | 0.679 |
| ENSP00000322924 | HTR1F    | 2.89E-05 | 0.048 | 900 | 0.493 |
| ENSP00000357020 | LY9      | 2.89E-05 | 0.048 | 824 | 0.498 |
| ENSP00000356595 | ABL2     | 2.74E-05 | 0.048 | 253 | 0.188 |

|                 |          |          |       |     |       |
|-----------------|----------|----------|-------|-----|-------|
| ENSP00000371432 | PRLR     | 2.68E-05 | 0.048 | 999 | 0.515 |
| ENSP00000370003 | BNIP3L   | 2.64E-05 | 0.048 | 313 | 0.232 |
| ENSP00000380450 | NOXO1    | 2.53E-05 | 0.048 | 243 | 0.048 |
| ENSP00000295269 | SLC9A4   | 2.18E-05 | 0.048 | 308 | 0.355 |
| ENSP00000242365 | KIAA1549 | 1.50E-05 | 0.048 | 252 | 0.066 |
| ENSP00000346206 | TAP1     | 5.51E-05 | 0.049 | 937 | 0.347 |
| ENSP00000238682 | TGFB3    | 5.37E-05 | 0.049 | 961 | 0.850 |
| ENSP00000266025 | TMEM115  | 4.94E-05 | 0.049 | 357 | 0.174 |
| ENSP00000365465 | CDSN     | 4.91E-05 | 0.049 | 554 | 0.429 |
| ENSP00000315130 | CLU      | 4.04E-05 | 0.049 | 902 | 0.556 |
| ENSP00000370088 | AMELX    | 4.04E-05 | 0.049 | 318 | 0.239 |
| ENSP00000341170 | PTN      | 4.01E-05 | 0.049 | 871 | 0.538 |
| ENSP00000410674 | NOTCH4   | 3.65E-05 | 0.049 | 851 | 0.810 |
| ENSP00000281806 | MCHR2    | 3.51E-05 | 0.049 | 899 | 0.507 |
| ENSP00000261826 | P2RX7    | 3.39E-05 | 0.049 | 883 | 0.493 |
| ENSP00000328472 | S1PR5    | 3.27E-05 | 0.049 | 910 | 0.504 |
| ENSP00000387281 | ADRA2B   | 2.89E-05 | 0.049 | 899 | 0.483 |
| ENSP00000330633 | CNTN2    | 2.75E-05 | 0.049 | 621 | 0.413 |
| ENSP00000261729 | RASAL1   | 2.66E-05 | 0.049 | 162 | 0.063 |
| ENSP00000273183 | STAC     | 2.63E-05 | 0.049 | 317 | 0.389 |
| ENSP00000358902 | SAMD10   | 2.20E-05 | 0.049 | 226 | 0.430 |
| ENSP00000309524 | CSHL1    | 1.18E-05 | 0.049 | 800 | 0.085 |



|                 |          |          |       |     |       |
|-----------------|----------|----------|-------|-----|-------|
| ENSP00000308472 | EIF4EBP3 | 1.16E-05 | 0.049 | 324 | 0.292 |
| ENSP00000324806 | GSK3B    | 8.38E-05 | 0.05  | -   | -     |
| ENSP00000343027 | GNAI1    | 6.77E-05 | 0.05  | -   | -     |
| ENSP00000228928 | OAS3     | 4.16E-05 | 0.05  | -   | -     |
| ENSP00000244241 | IL17C    | 3.82E-05 | 0.05  | -   | -     |
| ENSP00000251595 | HBA2     | 3.80E-05 | 0.05  | -   | -     |
| ENSP00000274793 | PLA2G7   | 3.61E-05 | 0.05  | -   | -     |
| ENSP00000223190 | NRF1     | 3.59E-05 | 0.05  | -   | -     |
| ENSP00000274695 | CDKAL1   | 3.56E-05 | 0.05  | -   | -     |
| ENSP00000353679 | MME      | 3.34E-05 | 0.05  | -   | -     |
| ENSP00000357255 | BGLAP    | 3.29E-05 | 0.05  | -   | -     |
| ENSP00000367930 | OXER1    | 2.89E-05 | 0.05  | -   | -     |
| ENSP00000386229 | RGS14    | 2.88E-05 | 0.05  | -   | -     |
| ENSP00000296694 | SCGB3A2  | 2.23E-05 | 0.05  | -   | -     |
| ENSP00000326110 | C5orf30  | 1.86E-05 | 0.05  | -   | -     |
| ENSP00000362711 | TXLNA    | 1.10E-05 | 0.05  | -   | -     |
| ENSP00000357778 | LCE3E    | 5.61E-05 | 0.051 | -   | -     |
| ENSP00000388386 | CDSN     | 5.02E-05 | 0.051 | -   | -     |
| ENSP00000233057 | EIF2AK2  | 4.96E-05 | 0.051 | -   | -     |
| ENSP00000305941 | USH2A    | 3.89E-05 | 0.051 | -   | -     |
| ENSP00000375022 | IGHV3-30 | 3.57E-05 | 0.051 | -   | -     |
| ENSP00000158762 | ACAP1    | 3.56E-05 | 0.051 | -   | -     |

|                 |          |          |       |   |   |
|-----------------|----------|----------|-------|---|---|
| ENSP00000302846 | PTGER4   | 3.04E-05 | 0.051 | - | - |
| ENSP00000261464 | TRAF5    | 2.96E-05 | 0.051 | - | - |
| ENSP00000297313 | RGS20    | 2.87E-05 | 0.051 | - | - |
| ENSP00000267953 | BCL2A1   | 2.85E-05 | 0.051 | - | - |
| ENSP00000394290 | GNL1     | 2.63E-05 | 0.051 | - | - |
| ENSP00000392726 | POM121L2 | 2.21E-05 | 0.051 | - | - |
| ENSP00000272519 | RALB     | 2.12E-05 | 0.051 | - | - |
| ENSP00000420298 | CD200    | 2.09E-05 | 0.051 | - | - |
| ENSP00000274276 | OSMR     | 1.73E-05 | 0.051 | - | - |
| ENSP00000244869 | EREG     | 1.70E-05 | 0.051 | - | - |
| ENSP00000357150 | CD1B     | 1.60E-05 | 0.051 | - | - |
| ENSP00000270452 | LILRB4   | 1.11E-05 | 0.051 | - | - |
| ENSP00000234590 | ENO1     | 5.94E-05 | 0.052 | - | - |
| ENSP00000354769 | C1orf68  | 5.43E-05 | 0.052 | - | - |
| ENSP00000251372 | LILRA1   | 1.34E-05 | 0.052 | - | - |
| ENSP00000307954 | FAM174A  | 1.08E-05 | 0.052 | - | - |
| ENSP00000305071 | RFXANK   | 3.68E-05 | 0.053 | - | - |
| ENSP00000242208 | INHBA    | 3.09E-05 | 0.053 | - | - |
| ENSP00000379282 | ABHD16A  | 3.06E-05 | 0.053 | - | - |
| ENSP00000340698 | GIPC1    | 2.96E-05 | 0.053 | - | - |
| ENSP00000357615 | FRK      | 2.87E-05 | 0.053 | - | - |
| ENSP00000325708 | CD37     | 2.83E-05 | 0.053 | - | - |

|                 |          |          |       |   |   |
|-----------------|----------|----------|-------|---|---|
| ENSP00000246949 | DNASE1   | 2.57E-05 | 0.053 | - | - |
| ENSP00000350256 | CCR9     | 2.49E-05 | 0.053 | - | - |
| ENSP00000277632 | FAM188A  | 1.79E-05 | 0.053 | - | - |
| ENSP00000357789 | FLG      | 6.90E-05 | 0.054 | - | - |
| ENSP00000353198 | PYY      | 3.16E-05 | 0.054 | - | - |
| ENSP00000358963 | HTR1B    | 3.06E-05 | 0.054 | - | - |
| ENSP00000285871 | CCDC146  | 2.25E-05 | 0.054 | - | - |
| ENSP00000331831 | GAS6     | 2.01E-05 | 0.054 | - | - |
| ENSP00000351430 | GYPE     | 1.81E-05 | 0.054 | - | - |
| ENSP00000356700 | C1orf105 | 1.67E-05 | 0.054 | - | - |
| ENSP00000347997 | UBQLN3   | 1.53E-05 | 0.054 | - | - |
| ENSP00000320866 | CALR     | 1.31E-04 | 0.055 | - | - |
| ENSP00000303830 | INSR     | 7.81E-05 | 0.055 | - | - |
| ENSP00000323795 | TEX35    | 7.29E-05 | 0.055 | - | - |
| ENSP00000309757 | LPL      | 6.55E-05 | 0.055 | - | - |
| ENSP00000358404 | TCF7L2   | 4.61E-05 | 0.055 | - | - |
| ENSP00000362082 | CCND3    | 4.33E-05 | 0.055 | - | - |
| ENSP00000319248 | ZEB1     | 3.11E-05 | 0.055 | - | - |
| ENSP00000356213 | VIP      | 3.08E-05 | 0.055 | - | - |
| ENSP00000243346 | NMI      | 2.77E-05 | 0.055 | - | - |
| ENSP00000409605 | TRIM15   | 2.71E-05 | 0.055 | - | - |
| ENSP00000302046 | RNASE6   | 1.73E-05 | 0.055 | - | - |

|                 |          |          |       |   |   |
|-----------------|----------|----------|-------|---|---|
| ENSP00000361281 | BEST4    | 1.40E-05 | 0.055 | - | - |
| ENSP00000309142 | PDE12    | 1.14E-05 | 0.055 | - | - |
| ENSP00000236671 | CTSD     | 5.62E-05 | 0.056 | - | - |
| ENSP00000265077 | VCAN     | 4.82E-05 | 0.056 | - | - |
| ENSP00000231188 | GRM6     | 3.20E-05 | 0.056 | - | - |
| ENSP00000262065 | MMD      | 3.02E-05 | 0.056 | - | - |
| ENSP00000286574 | WIF1     | 2.90E-05 | 0.056 | - | - |
| ENSP00000199764 | CEACAM6  | 2.82E-05 | 0.056 | - | - |
| ENSP00000192788 | UHRF1BP1 | 2.17E-05 | 0.056 | - | - |
| ENSP00000295640 | RNPEP    | 2.09E-05 | 0.056 | - | - |
| ENSP00000374902 | TRBV6-9  | 1.69E-05 | 0.056 | - | - |
| ENSP00000269445 | DYM      | 1.44E-05 | 0.056 | - | - |
| ENSP00000306245 | FOS      | 2.16E-04 | 0.057 | - | - |
| ENSP00000374990 | IGHG1    | 7.01E-05 | 0.057 | - | - |
| ENSP00000232014 | BCL6     | 6.64E-05 | 0.057 | - | - |
| ENSP00000357459 | ADAR     | 3.63E-05 | 0.057 | - | - |
| ENSP00000254436 | TRIM21   | 3.46E-05 | 0.057 | - | - |
| ENSP00000222307 | KXD1     | 3.42E-05 | 0.057 | - | - |
| ENSP00000264834 | KLF1     | 3.24E-05 | 0.057 | - | - |
| ENSP00000326259 | OR52H1   | 3.01E-05 | 0.057 | - | - |
| ENSP00000362850 | DSN1     | 2.70E-05 | 0.057 | - | - |
| ENSP00000296130 | CLEC3B   | 2.25E-05 | 0.057 | - | - |

|                 |          |          |       |   |   |
|-----------------|----------|----------|-------|---|---|
| ENSP00000362524 | ANGPTL2  | 1.74E-05 | 0.057 | - | - |
| ENSP00000316675 | PVRIG    | 1.63E-05 | 0.057 | - | - |
| ENSP00000369553 | IFNA8    | 1.21E-05 | 0.057 | - | - |
| ENSP00000215832 | MAPK1    | 1.35E-04 | 0.058 | - | - |
| ENSP00000342952 | ADCY2    | 8.35E-05 | 0.058 | - | - |
| ENSP00000324740 | YES1     | 6.49E-05 | 0.058 | - | - |
| ENSP00000365012 | HCK      | 4.69E-05 | 0.058 | - | - |
| ENSP00000250378 | CMA1     | 3.83E-05 | 0.058 | - | - |
| ENSP00000342082 | SLPI     | 2.98E-05 | 0.058 | - | - |
| ENSP00000330070 | NPW      | 2.89E-05 | 0.058 | - | - |
| ENSP00000320563 | WDFY4    | 2.19E-05 | 0.058 | - | - |
| ENSP00000370074 | SERPINB9 | 1.37E-05 | 0.058 | - | - |
| ENSP00000359301 | MAGEA3   | 4.91E-05 | 0.059 | - | - |
| ENSP00000284486 | FAM167A  | 3.41E-05 | 0.059 | - | - |
| ENSP00000268605 | NOL3     | 3.20E-05 | 0.059 | - | - |
| ENSP00000331103 | IP6K2    | 2.72E-05 | 0.059 | - | - |
| ENSP00000365806 | GNL1     | 2.63E-05 | 0.059 | - | - |
| ENSP00000283285 | CD96     | 2.62E-05 | 0.059 | - | - |
| ENSP00000274629 | KCNMB1   | 2.46E-05 | 0.059 | - | - |
| ENSP00000169298 | ST6GAL1  | 2.36E-05 | 0.059 | - | - |
| ENSP00000219919 | AQP9     | 2.32E-05 | 0.059 | - | - |
| ENSP00000400104 | RXRB     | 2.08E-05 | 0.059 | - | - |

|                 |          |          |       |   |   |
|-----------------|----------|----------|-------|---|---|
| ENSP00000249066 | APOL2    | 1.93E-05 | 0.059 | - | - |
| ENSP00000321997 | LARP1B   | 1.53E-05 | 0.059 | - | - |
| ENSP00000369566 | IFNA10   | 1.27E-05 | 0.059 | - | - |
| ENSP00000355583 | MLK4     | 1.07E-05 | 0.059 | - | - |
| ENSP00000358622 | IKBKG    | 8.66E-05 | 0.06  | - | - |
| ENSP00000355370 | CNTF     | 4.63E-05 | 0.06  | - | - |
| ENSP00000373169 | DRD3     | 3.73E-05 | 0.06  | - | - |
| ENSP00000252483 | PVRL2    | 3.14E-05 | 0.06  | - | - |
| ENSP00000315602 | CHRNA3   | 2.99E-05 | 0.06  | - | - |
| ENSP00000312988 | NFKBIB   | 2.61E-05 | 0.06  | - | - |
| ENSP00000392828 | GPSM1    | 2.18E-05 | 0.06  | - | - |
| ENSP00000300417 | LRSAM1   | 2.02E-05 | 0.06  | - | - |
| ENSP00000359446 | CPN1     | 1.48E-05 | 0.06  | - | - |
| ENSP00000273145 | CCBP2    | 1.34E-05 | 0.06  | - | - |
| ENSP00000317997 | DUOX1    | 1.03E-05 | 0.06  | - | - |
| ENSP00000369889 | COL2A1   | 6.05E-05 | 0.061 | - | - |
| ENSP00000381098 | GRIP1    | 5.85E-05 | 0.061 | - | - |
| ENSP00000257497 | ANXA1    | 5.67E-05 | 0.061 | - | - |
| ENSP00000364133 | TGFBR1   | 5.65E-05 | 0.061 | - | - |
| ENSP00000306361 | FGA      | 4.64E-05 | 0.061 | - | - |
| ENSP00000296435 | CAMP     | 4.44E-05 | 0.061 | - | - |
| ENSP00000264867 | PPARGC1A | 3.97E-05 | 0.061 | - | - |

|                 |         |          |       |   |   |
|-----------------|---------|----------|-------|---|---|
| ENSP00000276689 | NDUFB9  | 3.88E-05 | 0.061 | - | - |
| ENSP00000262768 | TIMP2   | 3.82E-05 | 0.061 | - | - |
| ENSP00000345161 | SFTPB   | 3.73E-05 | 0.061 | - | - |
| ENSP00000399530 | SKIV2L  | 3.71E-05 | 0.061 | - | - |
| ENSP00000386200 | FOXP2   | 3.59E-05 | 0.061 | - | - |
| ENSP00000390131 | NCR3    | 3.43E-05 | 0.061 | - | - |
| ENSP00000401504 | HLA-DOA | 2.69E-05 | 0.061 | - | - |
| ENSP00000317674 | APOL1   | 2.15E-05 | 0.061 | - | - |
| ENSP00000314879 | ALOXE3  | 1.85E-05 | 0.061 | - | - |
| ENSP00000284981 | APP     | 1.13E-04 | 0.062 | - | - |
| ENSP00000360871 | FCN1    | 3.44E-05 | 0.062 | - | - |
| ENSP00000293362 | PSME3   | 2.91E-05 | 0.062 | - | - |
| ENSP00000265131 | TNC     | 2.87E-05 | 0.062 | - | - |
| ENSP00000379475 | DDX39B  | 2.82E-05 | 0.062 | - | - |
| ENSP00000314223 | GPR88   | 2.70E-05 | 0.062 | - | - |
| ENSP00000388566 | CASP4   | 2.46E-05 | 0.062 | - | - |
| ENSP00000270474 | PDE4A   | 6.20E-05 | 0.063 | - | - |
| ENSP00000298942 | PTER    | 5.13E-05 | 0.063 | - | - |
| ENSP00000311545 | EMR1    | 4.69E-05 | 0.063 | - | - |
| ENSP00000292401 | AZGP1   | 3.40E-05 | 0.063 | - | - |
| ENSP00000353820 | CYP2D6  | 3.37E-05 | 0.063 | - | - |
| ENSP00000330393 | LEPR    | 3.13E-05 | 0.063 | - | - |

|                 |          |          |       |   |   |
|-----------------|----------|----------|-------|---|---|
| ENSP00000330284 | NPBWR1   | 2.90E-05 | 0.063 | - | - |
| ENSP00000273951 | GC       | 2.45E-05 | 0.063 | - | - |
| ENSP00000265388 | TNPO3    | 2.29E-05 | 0.063 | - | - |
| ENSP00000311697 | FGF5     | 2.06E-05 | 0.063 | - | - |
| ENSP00000234816 | ANGPTL1  | 1.93E-05 | 0.063 | - | - |
| ENSP00000405176 | TWIST2   | 1.36E-05 | 0.063 | - | - |
| ENSP00000227507 | CCND1    | 1.11E-04 | 0.064 | - | - |
| ENSP00000373023 | CDSN     | 5.46E-05 | 0.064 | - | - |
| ENSP00000296154 | CASR     | 5.33E-05 | 0.064 | - | - |
| ENSP00000263645 | CD81     | 5.11E-05 | 0.064 | - | - |
| ENSP00000009180 | CD9      | 4.26E-05 | 0.064 | - | - |
| ENSP00000333194 | RGS19    | 3.58E-05 | 0.064 | - | - |
| ENSP00000263036 | OPTN     | 3.48E-05 | 0.064 | - | - |
| ENSP00000408581 | TMEM132D | 2.29E-05 | 0.064 | - | - |
| ENSP00000375899 | SP140    | 2.10E-05 | 0.064 | - | - |
| ENSP00000355157 | FCRL2    | 1.77E-05 | 0.064 | - | - |
| ENSP00000331152 | MXI1     | 1.65E-05 | 0.064 | - | - |
| ENSP00000400326 | DDX39B   | 6.27E-05 | 0.065 | - | - |
| ENSP00000332225 | PMCH     | 4.61E-05 | 0.065 | - | - |
| ENSP00000353408 | MSN      | 4.51E-05 | 0.065 | - | - |
| ENSP00000356505 | NCF2     | 4.35E-05 | 0.065 | - | - |
| ENSP00000242057 | AHR      | 4.34E-05 | 0.065 | - | - |



|                 |          |          |       |   |   |
|-----------------|----------|----------|-------|---|---|
| ENSP00000361548 | MPL      | 3.39E-05 | 0.065 | - | - |
| ENSP00000350815 | NR3C2    | 3.14E-05 | 0.065 | - | - |
| ENSP00000247270 | EVI2A    | 2.85E-05 | 0.065 | - | - |
| ENSP00000291842 | SHKBP1   | 2.77E-05 | 0.065 | - | - |
| ENSP00000229332 | CLEC4A   | 2.41E-05 | 0.065 | - | - |
| ENSP00000295117 | CCDC104  | 2.31E-05 | 0.065 | - | - |
| ENSP00000244336 | CEACAM8  | 1.48E-05 | 0.065 | - | - |
| ENSP00000300057 | MESP1    | 1.18E-05 | 0.065 | - | - |
| ENSP00000339328 | PLAUR    | 6.15E-05 | 0.066 | - | - |
| ENSP00000315878 | MS4A6A   | 4.27E-05 | 0.066 | - | - |
| ENSP00000344352 | ATF3     | 3.73E-05 | 0.066 | - | - |
| ENSP00000351908 | MAP3K5   | 3.72E-05 | 0.066 | - | - |
| ENSP00000322421 | HBA1     | 3.18E-05 | 0.066 | - | - |
| ENSP00000352455 | MFAP5    | 2.67E-05 | 0.066 | - | - |
| ENSP00000309714 | SH3PXD2B | 2.46E-05 | 0.066 | - | - |
| ENSP00000307666 | CCDC132  | 2.45E-05 | 0.066 | - | - |
| ENSP00000244043 | PTGIS    | 1.93E-05 | 0.066 | - | - |
| ENSP00000342156 | NCR3     | 1.66E-05 | 0.066 | - | - |
| ENSP00000349616 | ADIPOR2  | 1.26E-05 | 0.066 | - | - |
| ENSP00000396538 | NFAT5    | 5.45E-05 | 0.067 | - | - |
| ENSP00000364000 | COL5A2   | 4.59E-05 | 0.067 | - | - |
| ENSP00000354822 | XAF1     | 3.76E-05 | 0.067 | - | - |

|                 |        |          |       |   |   |
|-----------------|--------|----------|-------|---|---|
| ENSP00000272167 | EPHX1  | 3.10E-05 | 0.067 | - | - |
| ENSP00000409367 | GNL1   | 3.08E-05 | 0.067 | - | - |
| ENSP00000363431 | NPY4R  | 2.89E-05 | 0.067 | - | - |
| ENSP00000298596 | STOX1  | 2.45E-05 | 0.067 | - | - |
| ENSP00000232424 | HES1   | 1.98E-05 | 0.067 | - | - |
| ENSP00000365530 | STXBP4 | 1.72E-05 | 0.067 | - | - |
| ENSP00000367069 | ZFAT   | 1.55E-05 | 0.067 | - | - |
| ENSP00000321445 | MSC    | 1.49E-05 | 0.067 | - | - |
| ENSP00000377502 | PHLDB2 | 1.23E-05 | 0.067 | - | - |
| ENSP00000368104 | BMP2   | 6.93E-05 | 0.068 | - | - |
| ENSP00000231509 | NR3C1  | 6.53E-05 | 0.068 | - | - |
| ENSP00000241416 | ACVR2A | 3.36E-05 | 0.068 | - | - |
| ENSP00000403576 | GNL1   | 3.08E-05 | 0.068 | - | - |
| ENSP00000312002 | HAVCR2 | 2.36E-05 | 0.068 | - | - |
| ENSP00000295756 | TRAT1  | 2.24E-05 | 0.068 | - | - |
| ENSP00000354119 | LAT    | 2.15E-05 | 0.068 | - | - |
| ENSP00000392787 | TRIM27 | 1.81E-05 | 0.068 | - | - |
| ENSP00000342667 | RNF19A | 1.44E-05 | 0.068 | - | - |
| ENSP00000278071 | ITPRIP | 1.23E-05 | 0.068 | - | - |
| ENSP00000363822 | AR     | 9.71E-05 | 0.069 | - | - |
| ENSP00000287727 | ZFYVE9 | 7.57E-05 | 0.069 | - | - |
| ENSP00000294724 | AGL    | 5.97E-05 | 0.069 | - | - |

|                 |         |          |       |   |   |
|-----------------|---------|----------|-------|---|---|
| ENSP00000264110 | ATF2    | 4.64E-05 | 0.069 | - | - |
| ENSP00000366410 | NMNAT1  | 3.56E-05 | 0.069 | - | - |
| ENSP00000261714 | BLMH    | 2.69E-05 | 0.069 | - | - |
| ENSP00000268459 | NKD1    | 2.40E-05 | 0.069 | - | - |
| ENSP00000349967 | CCRL2   | 1.94E-05 | 0.069 | - | - |
| ENSP00000366682 | IRG1    | 1.89E-05 | 0.069 | - | - |
| ENSP00000337144 | AQP12A  | 1.62E-05 | 0.069 | - | - |
| ENSP00000206249 | ESR1    | 1.43E-04 | 0.07  | - | - |
| ENSP00000241052 | CAT     | 5.96E-05 | 0.07  | - | - |
| ENSP00000401303 | SHC1    | 4.27E-05 | 0.07  | - | - |
| ENSP00000375557 | POU5F1B | 3.85E-05 | 0.07  | - | - |
| ENSP00000255262 | NMUR2   | 3.75E-05 | 0.07  | - | - |
| ENSP00000344577 | APOL3   | 2.14E-05 | 0.07  | - | - |
| ENSP00000312099 | CRYGS   | 1.96E-05 | 0.07  | - | - |
| ENSP00000355941 | TATDN3  | 1.90E-05 | 0.07  | - | - |
| ENSP00000314976 | IL20RA  | 1.66E-05 | 0.07  | - | - |
| ENSP00000336762 | ANG     | 1.65E-05 | 0.07  | - | - |
| ENSP00000312304 | TPMT    | 1.53E-05 | 0.07  | - | - |
| ENSP00000369571 | IFNA14  | 1.41E-05 | 0.07  | - | - |
| ENSP00000257267 | C5AR2   | 1.14E-05 | 0.07  | - | - |
| ENSP00000334448 | GNG2    | 5.92E-05 | 0.071 | - | - |
| ENSP00000256458 | IRAK2   | 3.69E-05 | 0.071 | - | - |

|                 |          |          |       |   |   |
|-----------------|----------|----------|-------|---|---|
| ENSP00000249636 | PIAS1    | 3.65E-05 | 0.071 | - | - |
| ENSP00000337632 | SARNP    | 2.44E-05 | 0.071 | - | - |
| ENSP00000171757 | P2RY10   | 2.23E-05 | 0.071 | - | - |
| ENSP00000325506 | CLVS1    | 2.17E-05 | 0.071 | - | - |
| ENSP00000270632 | SPIB     | 2.08E-05 | 0.071 | - | - |
| ENSP00000261368 | SNCAIP   | 1.80E-05 | 0.071 | - | - |
| ENSP00000317357 | OR13D1   | 1.49E-05 | 0.071 | - | - |
| ENSP00000360718 | RAB3B    | 6.31E-05 | 0.072 | - | - |
| ENSP00000264218 | NMU      | 3.86E-05 | 0.072 | - | - |
| ENSP00000252029 | TYMP     | 3.63E-05 | 0.072 | - | - |
| ENSP00000376849 | CASP5    | 2.91E-05 | 0.072 | - | - |
| ENSP00000348215 | SH3PXD2A | 2.43E-05 | 0.072 | - | - |
| ENSP00000354632 | MT-ATP6  | 2.32E-05 | 0.072 | - | - |
| ENSP00000351113 | FRYL     | 2.16E-05 | 0.072 | - | - |
| ENSP00000244519 | BTN3A3   | 2.00E-05 | 0.072 | - | - |
| ENSP00000357301 | RXFP4    | 3.50E-05 | 0.073 | - | - |
| ENSP00000366396 | XRN2     | 3.26E-05 | 0.073 | - | - |
| ENSP00000327054 | LMNB2    | 2.86E-05 | 0.073 | - | - |
| ENSP00000255688 | RARRES3  | 2.50E-05 | 0.073 | - | - |
| ENSP00000374778 | IGKV4-1  | 1.97E-05 | 0.073 | - | - |
| ENSP00000256447 | CD180    | 1.72E-05 | 0.073 | - | - |
| ENSP00000267890 | TTBK2    | 1.53E-05 | 0.073 | - | - |

|                 |          |          |       |   |   |
|-----------------|----------|----------|-------|---|---|
| ENSP00000341905 | RASAL3   | 1.41E-05 | 0.073 | - | - |
| ENSP00000412800 | DDAH2    | 1.04E-05 | 0.073 | - | - |
| ENSP00000340858 | B2M      | 2.12E-04 | 0.074 | - | - |
| ENSP00000052754 | DCN      | 7.47E-05 | 0.074 | - | - |
| ENSP00000348234 | TAT      | 4.78E-05 | 0.074 | - | - |
| ENSP00000376436 | ETS1     | 4.20E-05 | 0.074 | - | - |
| ENSP00000257857 | CD63     | 3.53E-05 | 0.074 | - | - |
| ENSP00000355520 | RGS7     | 2.93E-05 | 0.074 | - | - |
| ENSP00000381823 | SEC24A   | 2.82E-05 | 0.074 | - | - |
| ENSP00000264758 | ADD1     | 2.17E-05 | 0.074 | - | - |
| ENSP00000320503 | EDC3     | 2.15E-05 | 0.074 | - | - |
| ENSP00000344967 | SPRY4    | 2.09E-05 | 0.074 | - | - |
| ENSP00000341030 | CSN2     | 1.72E-05 | 0.074 | - | - |
| ENSP00000343891 | NLRP13   | 1.37E-05 | 0.074 | - | - |
| ENSP00000220597 | PAG1     | 1.26E-05 | 0.074 | - | - |
| ENSP00000361125 | VEGFA    | 2.59E-04 | 0.075 | - | - |
| ENSP00000358548 | NRAS     | 7.91E-05 | 0.075 | - | - |
| ENSP00000368683 | EDN1     | 5.46E-05 | 0.075 | - | - |
| ENSP00000275525 | IGFBP1   | 4.58E-05 | 0.075 | - | - |
| ENSP00000263826 | AKT3     | 4.00E-05 | 0.075 | - | - |
| ENSP00000402316 | TAP1     | 3.72E-05 | 0.075 | - | - |
| ENSP00000385057 | APOBEC3G | 3.46E-05 | 0.075 | - | - |

|                 |         |          |       |   |   |
|-----------------|---------|----------|-------|---|---|
| ENSP00000357794 | TCHH    | 3.11E-05 | 0.075 | - | - |
| ENSP00000372155 | PSME1   | 2.78E-05 | 0.075 | - | - |
| ENSP00000364683 | BAMBI   | 2.36E-05 | 0.075 | - | - |
| ENSP00000367608 | CA9     | 2.31E-05 | 0.075 | - | - |
| ENSP00000230568 | LY86    | 4.61E-05 | 0.076 | - | - |
| ENSP00000231004 | LOX     | 4.47E-05 | 0.076 | - | - |
| ENSP00000407375 | GPX1    | 3.91E-05 | 0.076 | - | - |
| ENSP00000358165 | FCGR1A  | 3.42E-05 | 0.076 | - | - |
| ENSP00000365175 | PRRC2A  | 3.28E-05 | 0.076 | - | - |
| ENSP00000264474 | CSTA    | 2.71E-05 | 0.076 | - | - |
| ENSP00000269980 | BCKDHA  | 2.66E-05 | 0.076 | - | - |
| ENSP00000259254 | GYPC    | 2.51E-05 | 0.076 | - | - |
| ENSP00000310832 | CTSF    | 1.11E-05 | 0.076 | - | - |
| ENSP00000220809 | PLAT    | 6.15E-05 | 0.077 | - | - |
| ENSP00000261799 | PDGFRB  | 5.87E-05 | 0.077 | - | - |
| ENSP00000357494 | ROS1    | 4.58E-05 | 0.077 | - | - |
| ENSP00000358541 | SIKE1   | 4.19E-05 | 0.077 | - | - |
| ENSP00000324248 | PENK    | 3.67E-05 | 0.077 | - | - |
| ENSP00000363998 | ITCH    | 3.14E-05 | 0.077 | - | - |
| ENSP00000222553 | NAMPT   | 2.85E-05 | 0.077 | - | - |
| ENSP00000216214 | FAM118A | 1.69E-05 | 0.077 | - | - |
| ENSP00000287482 | SASS6   | 1.65E-05 | 0.077 | - | - |

|                 |         |          |       |   |   |
|-----------------|---------|----------|-------|---|---|
| ENSP00000393996 | AIF1    | 1.46E-05 | 0.077 | - | - |
| ENSP00000219535 | FAM173A | 1.27E-05 | 0.077 | - | - |
| ENSP00000358867 | GNAI3   | 5.88E-05 | 0.078 | - | - |
| ENSP00000395337 | LDHA    | 4.14E-05 | 0.078 | - | - |
| ENSP00000215479 | AMELY   | 4.01E-05 | 0.078 | - | - |
| ENSP00000218758 | ACP5    | 3.18E-05 | 0.078 | - | - |
| ENSP00000331614 | IKZF1   | 2.71E-05 | 0.078 | - | - |
| ENSP00000267101 | ERBB3   | 5.50E-05 | 0.079 | - | - |
| ENSP00000217305 | PDYN    | 4.00E-05 | 0.079 | - | - |
| ENSP00000340347 | TCF7    | 3.44E-05 | 0.079 | - | - |
| ENSP00000363031 | THEMIS2 | 3.22E-05 | 0.079 | - | - |
| ENSP00000333268 | CSH1    | 2.52E-05 | 0.079 | - | - |
| ENSP00000402460 | CLSTN2  | 1.55E-05 | 0.079 | - | - |
| ENSP00000391116 | NBPF12  | 1.42E-05 | 0.079 | - | - |
| ENSP00000349181 | HVCN1   | 1.37E-05 | 0.079 | - | - |
| ENSP00000383516 | HMX1    | 1.07E-05 | 0.079 | - | - |
| ENSP00000220772 | SFRP1   | 3.37E-05 | 0.08  | - | - |
| ENSP00000358203 | NBPF20  | 2.53E-05 | 0.08  | - | - |
| ENSP00000281317 | MMAA    | 1.70E-05 | 0.08  | - | - |
| ENSP00000349723 | BCL11B  | 1.39E-05 | 0.08  | - | - |
| ENSP00000254691 | CARD6   | 1.32E-05 | 0.08  | - | - |
| ENSP00000343925 | ESR2    | 8.13E-05 | 0.081 | - | - |

|                 |          |          |       |   |   |
|-----------------|----------|----------|-------|---|---|
| ENSP00000252034 | ELN      | 5.91E-05 | 0.081 | - | - |
| ENSP00000389875 | PSORS1C1 | 3.02E-05 | 0.081 | - | - |
| ENSP00000254325 | RFX1     | 2.92E-05 | 0.081 | - | - |
| ENSP00000328708 | RXFP3    | 2.88E-05 | 0.081 | - | - |
| ENSP00000336630 | ADORA2A  | 2.65E-05 | 0.081 | - | - |
| ENSP00000362446 | ZNF79    | 2.13E-05 | 0.081 | - | - |
| ENSP00000366863 | TBC1D4   | 2.05E-05 | 0.081 | - | - |
| ENSP00000388910 | NFATC4   | 1.79E-05 | 0.081 | - | - |
| ENSP00000406250 | HLA-DPA1 | 1.53E-05 | 0.081 | - | - |
| ENSP00000329568 | NLRP7    | 1.27E-05 | 0.081 | - | - |
| ENSP00000228872 | CDKN1B   | 5.51E-05 | 0.082 | - | - |
| ENSP00000329623 | BCL2     | 5.36E-05 | 0.082 | - | - |
| ENSP00000399604 | CDSN     | 5.02E-05 | 0.082 | - | - |
| ENSP00000348611 | PHLPP2   | 3.89E-05 | 0.082 | - | - |
| ENSP00000290122 | CELA3A   | 2.85E-05 | 0.082 | - | - |
| ENSP00000334052 | LGMN     | 2.56E-05 | 0.082 | - | - |
| ENSP00000246006 | CD93     | 2.36E-05 | 0.082 | - | - |
| ENSP00000225387 | CRYBA1   | 2.00E-05 | 0.082 | - | - |
| ENSP00000345317 | CXCL17   | 1.15E-05 | 0.082 | - | - |
| ENSP00000369564 | IFNA16   | 1.03E-05 | 0.082 | - | - |
| ENSP00000254351 | SDC1     | 4.70E-05 | 0.083 | - | - |
| ENSP00000241125 | GJA3     | 3.52E-05 | 0.083 | - | - |



|                 |        |          |       |   |   |
|-----------------|--------|----------|-------|---|---|
| ENSP00000415363 | PRRC2A | 3.09E-05 | 0.083 | - | - |
| ENSP00000394400 | SKIV2L | 3.09E-05 | 0.083 | - | - |
| ENSP00000399542 | DDX39B | 2.92E-05 | 0.083 | - | - |
| ENSP00000231656 | CDX1   | 2.78E-05 | 0.083 | - | - |
| ENSP00000363377 | FOXO4  | 2.51E-05 | 0.083 | - | - |
| ENSP00000338648 | MS4A4A | 1.49E-05 | 0.083 | - | - |
| ENSP00000372901 | DDAH2  | 1.09E-05 | 0.083 | - | - |
| ENSP00000244741 | CDKN1A | 8.55E-05 | 0.084 | - | - |
| ENSP00000277480 | LCN2   | 3.87E-05 | 0.084 | - | - |
| ENSP00000234091 | ID2    | 3.70E-05 | 0.084 | - | - |
| ENSP00000294339 | TAL1   | 3.27E-05 | 0.084 | - | - |
| ENSP00000248901 | CYTH4  | 2.93E-05 | 0.084 | - | - |
| ENSP00000337053 | SEL1L  | 2.93E-05 | 0.084 | - | - |
| ENSP00000230882 | GHR    | 2.74E-05 | 0.084 | - | - |
| ENSP00000389207 | NOTCH4 | 2.36E-05 | 0.084 | - | - |
| ENSP00000270139 | IFNAR1 | 3.76E-05 | 0.085 | - | - |
| ENSP00000293330 | HCRT   | 3.59E-05 | 0.085 | - | - |
| ENSP00000379158 | CAST   | 3.24E-05 | 0.085 | - | - |
| ENSP00000401321 | NOTCH4 | 2.48E-05 | 0.085 | - | - |
| ENSP00000372751 | NOTCH4 | 2.36E-05 | 0.085 | - | - |
| ENSP00000367631 | ANKEF1 | 2.32E-05 | 0.085 | - | - |
| ENSP00000266066 | SFRP5  | 2.22E-05 | 0.085 | - | - |

|                 |          |          |       |   |   |
|-----------------|----------|----------|-------|---|---|
| ENSP00000261454 | PROX1    | 2.05E-05 | 0.085 | - | - |
| ENSP00000276420 | DOK2     | 1.55E-05 | 0.085 | - | - |
| ENSP00000368766 | ADRA1D   | 3.66E-05 | 0.086 | - | - |
| ENSP00000362410 | MAFB     | 2.83E-05 | 0.086 | - | - |
| ENSP00000216274 | RIPK3    | 1.57E-05 | 0.086 | - | - |
| ENSP00000251973 | CARD10   | 1.41E-05 | 0.086 | - | - |
| ENSP00000359013 | TNFRSF6B | 1.24E-05 | 0.086 | - | - |
| ENSP00000364252 | PLA2G2A  | 5.55E-05 | 0.087 | - | - |
| ENSP00000241651 | MYOG     | 4.64E-05 | 0.087 | - | - |
| ENSP00000254322 | DNAJB1   | 3.43E-05 | 0.087 | - | - |
| ENSP00000225992 | PPY      | 3.10E-05 | 0.087 | - | - |
| ENSP00000302811 | MTNR1A   | 2.93E-05 | 0.087 | - | - |
| ENSP00000215939 | CRYBB1   | 2.20E-05 | 0.087 | - | - |
| ENSP00000366031 | CST7     | 2.18E-05 | 0.087 | - | - |
| ENSP00000356630 | HECA     | 1.76E-05 | 0.087 | - | - |
| ENSP00000388107 | UBA52    | 1.83E-04 | 0.088 | - | - |
| ENSP00000216336 | CTSG     | 3.72E-05 | 0.088 | - | - |
| ENSP00000274063 | SFRP2    | 2.92E-05 | 0.088 | - | - |
| ENSP00000268150 | MFGE8    | 2.36E-05 | 0.088 | - | - |
| ENSP00000296125 | TGM4     | 1.19E-05 | 0.088 | - | - |
| ENSP00000307272 | RPTOR    | 3.19E-05 | 0.089 | - | - |
| ENSP00000233813 | IGFBP5   | 2.69E-05 | 0.089 | - | - |

|                 |         |          |       |   |   |
|-----------------|---------|----------|-------|---|---|
| ENSP00000234831 | TMEM59  | 2.40E-05 | 0.089 | - | - |
| ENSP00000331066 | OLIG1   | 2.30E-05 | 0.089 | - | - |
| ENSP00000345393 | MAFF    | 2.14E-05 | 0.089 | - | - |
| ENSP00000396251 | GTF2H4  | 2.08E-05 | 0.089 | - | - |
| ENSP00000357791 | HRNR    | 1.71E-05 | 0.089 | - | - |
| ENSP00000348632 | RBCK1   | 1.47E-05 | 0.089 | - | - |
| ENSP00000295006 | CAPN2   | 1.30E-05 | 0.089 | - | - |
| ENSP00000360286 | RAE1    | 4.97E-05 | 0.09  | - | - |
| ENSP00000419425 | PPIA    | 4.10E-05 | 0.09  | - | - |
| ENSP00000326247 | SAMD9L  | 3.96E-05 | 0.09  | - | - |
| ENSP00000320401 | UGT2B17 | 3.17E-05 | 0.09  | - | - |
| ENSP00000259895 | GTF2H4  | 2.09E-05 | 0.09  | - | - |
| ENSP00000331698 | KCNJ15  | 1.63E-05 | 0.09  | - | - |
| ENSP00000367714 | HES5    | 3.46E-05 | 0.091 | - | - |
| ENSP00000314733 | TOLLIP  | 3.20E-05 | 0.091 | - | - |
| ENSP00000229330 | HCFC2   | 2.05E-05 | 0.091 | - | - |
| ENSP00000347979 | FAS     | 1.77E-05 | 0.091 | - | - |
| ENSP00000344549 | CARD14  | 1.37E-05 | 0.091 | - | - |
| ENSP00000412309 | SLC14A1 | 1.11E-05 | 0.091 | - | - |
| ENSP00000360125 | PGM1    | 3.05E-05 | 0.092 | - | - |
| ENSP00000310170 | FOSL1   | 2.87E-05 | 0.092 | - | - |
| ENSP00000394049 | SLA     | 2.43E-05 | 0.092 | - | - |

|                 |        |          |       |   |   |
|-----------------|--------|----------|-------|---|---|
| ENSP00000388322 | HHLA1  | 2.00E-05 | 0.092 | - | - |
| ENSP00000239223 | DUSP1  | 1.83E-05 | 0.092 | - | - |
| ENSP00000374552 | RNF216 | 1.27E-05 | 0.092 | - | - |
| ENSP00000270879 | FCN3   | 1.07E-05 | 0.092 | - | - |
| ENSP00000401272 | GPANK1 | 4.43E-05 | 0.093 | - | - |
| ENSP00000386444 | SAG    | 3.04E-05 | 0.093 | - | - |
| ENSP00000354335 | MPEG1  | 2.90E-05 | 0.093 | - | - |
| ENSP00000357033 | CD84   | 1.53E-05 | 0.093 | - | - |
| ENSP00000264036 | MCAM   | 1.38E-05 | 0.093 | - | - |
| ENSP00000401548 | TCF19  | 3.23E-05 | 0.094 | - | - |
| ENSP00000316244 | HTR1A  | 3.20E-05 | 0.094 | - | - |
| ENSP00000298910 | LRRK2  | 3.10E-05 | 0.094 | - | - |
| ENSP00000368686 | E2F4   | 2.94E-05 | 0.094 | - | - |
| ENSP00000348099 | PDLIM7 | 2.74E-05 | 0.094 | - | - |
| ENSP00000330005 | RGMA   | 2.45E-05 | 0.094 | - | - |
| ENSP00000222286 | GAPDHS | 2.31E-05 | 0.094 | - | - |
| ENSP00000267012 | BIN2   | 2.04E-05 | 0.094 | - | - |
| ENSP00000374855 | IGLC1  | 1.71E-05 | 0.094 | - | - |
| ENSP00000384053 | CSF2RB | 1.41E-05 | 0.094 | - | - |
| ENSP00000364694 | ASPN   | 4.31E-05 | 0.095 | - | - |
| ENSP00000007722 | ITGA3  | 3.49E-05 | 0.095 | - | - |
| ENSP00000215909 | LGALS1 | 3.42E-05 | 0.095 | - | - |

|                 |          |          |       |   |   |
|-----------------|----------|----------|-------|---|---|
| ENSP00000265983 | HPX      | 3.33E-05 | 0.095 | - | - |
| ENSP00000367124 | SLC3A2   | 3.24E-05 | 0.095 | - | - |
| ENSP00000382423 | MAP3K1   | 3.12E-05 | 0.095 | - | - |
| ENSP00000294489 | PDPN     | 2.76E-05 | 0.095 | - | - |
| ENSP00000297991 | AQP3     | 2.33E-05 | 0.095 | - | - |
| ENSP00000354607 | FZD5     | 2.13E-05 | 0.095 | - | - |
| ENSP00000372313 | MSLN     | 1.57E-05 | 0.095 | - | - |
| ENSP00000341551 | SMAD4    | 8.20E-05 | 0.096 | - | - |
| ENSP00000291700 | S100B    | 3.43E-05 | 0.096 | - | - |
| ENSP00000305152 | PLP1     | 2.79E-05 | 0.096 | - | - |
| ENSP00000294338 | PDZK1IP1 | 2.16E-05 | 0.096 | - | - |
| ENSP00000346805 | CRYBA4   | 1.73E-05 | 0.096 | - | - |
| ENSP00000335203 | ATPIF1   | 1.71E-05 | 0.096 | - | - |
| ENSP00000362469 | SLC2A8   | 1.30E-05 | 0.096 | - | - |
| ENSP00000331857 | NLRP9    | 1.17E-05 | 0.096 | - | - |
| ENSP00000324648 | CYP2B6   | 6.23E-05 | 0.097 | - | - |
| ENSP00000338297 | IGF2     | 4.72E-05 | 0.097 | - | - |
| ENSP00000280551 | SEC24D   | 2.80E-05 | 0.097 | - | - |
| ENSP00000323901 | FZD2     | 2.44E-05 | 0.097 | - | - |
| ENSP00000325589 | PTPRCAP  | 1.90E-05 | 0.097 | - | - |
| ENSP00000356581 | GPR126   | 1.57E-05 | 0.097 | - | - |
| ENSP00000266839 | MMAB     | 1.52E-05 | 0.097 | - | - |

|                 |         |          |       |   |   |
|-----------------|---------|----------|-------|---|---|
| ENSP00000343339 | P2RX2   | 1.52E-05 | 0.097 | - | - |
| ENSP00000415900 | IL31RA  | 1.17E-05 | 0.097 | - | - |
| ENSP00000340330 | KAT5    | 4.25E-05 | 0.098 | - | - |
| ENSP00000352157 | MAPK10  | 3.96E-05 | 0.098 | - | - |
| ENSP00000253054 | GMFG    | 2.85E-05 | 0.098 | - | - |
| ENSP00000292199 | NLRX1   | 2.52E-05 | 0.098 | - | - |
| ENSP00000221498 | DKKL1   | 2.44E-05 | 0.098 | - | - |
| ENSP00000316152 | SFTPC   | 2.34E-05 | 0.098 | - | - |
| ENSP00000274217 | FAM105A | 1.97E-05 | 0.098 | - | - |
| ENSP00000354691 | FCRL5   | 1.92E-05 | 0.098 | - | - |
| ENSP00000418901 | SYT14   | 1.85E-05 | 0.098 | - | - |
| ENSP00000260197 | SORL1   | 1.73E-05 | 0.098 | - | - |
| ENSP00000262177 | DNAJB6  | 1.50E-05 | 0.098 | - | - |
| ENSP00000318770 | AQP11   | 1.28E-05 | 0.098 | - | - |
| ENSP00000289932 | SLC5A11 | 1.24E-05 | 0.098 | - | - |
| ENSP00000357283 | LMNA    | 5.17E-05 | 0.099 | - | - |
| ENSP00000369127 | DNAJA1  | 3.08E-05 | 0.099 | - | - |
| ENSP00000406965 | ABHD16A | 3.07E-05 | 0.099 | - | - |
| ENSP00000300108 | TAC3    | 2.28E-05 | 0.099 | - | - |
| ENSP00000346402 | RNH1    | 2.26E-05 | 0.099 | - | - |
| ENSP00000370297 | CER1    | 1.96E-05 | 0.099 | - | - |
| ENSP00000385461 | TFDP3   | 1.63E-05 | 0.099 | - | - |

|                 |           |          |       |   |   |
|-----------------|-----------|----------|-------|---|---|
| ENSP00000351209 | EPHA2     | 3.65E-05 | 0.1   | - | - |
| ENSP00000249016 | MCHR1     | 3.57E-05 | 0.1   | - | - |
| ENSP00000226299 | LAP3      | 3.56E-05 | 0.1   | - | - |
| ENSP00000357711 | S100A7    | 2.95E-05 | 0.1   | - | - |
| ENSP00000322304 | PORCN     | 2.58E-05 | 0.1   | - | - |
| ENSP00000356037 | C4BPA     | 2.45E-05 | 0.1   | - | - |
| ENSP00000364163 | NOTCH4    | 2.37E-05 | 0.1   | - | - |
| ENSP00000262878 | SAMHD1    | 2.04E-05 | 0.1   | - | - |
| ENSP00000286186 | CASP10    | 1.81E-05 | 0.1   | - | - |
| ENSP00000312741 | CAMKK2    | 1.71E-05 | 0.1   | - | - |
| ENSP00000342538 | STMN4     | 1.41E-05 | 0.1   | - | - |
| ENSP00000323568 | SLC2A2    | 3.33E-05 | 0.101 | - | - |
| ENSP00000304858 | ORMDL3    | 3.24E-05 | 0.101 | - | - |
| ENSP00000261292 | LIPG      | 3.13E-05 | 0.101 | - | - |
| ENSP00000346829 | WLS       | 2.32E-05 | 0.101 | - | - |
| ENSP00000264553 | GZMM      | 1.68E-05 | 0.101 | - | - |
| ENSP00000391372 | SH3GL3    | 1.58E-05 | 0.101 | - | - |
| ENSP00000279463 | CNTN5     | 1.11E-05 | 0.101 | - | - |
| ENSP00000359910 | PSMA7     | 3.39E-05 | 0.102 | - | - |
| ENSP00000269485 | TNFRSF11A | 3.35E-05 | 0.102 | - | - |
| ENSP00000405229 | TRIM27    | 2.48E-05 | 0.102 | - | - |
| ENSP00000364893 | ARHGEF7   | 2.44E-05 | 0.102 | - | - |

|                 |         |          |       |   |   |
|-----------------|---------|----------|-------|---|---|
| ENSP00000320516 | EHD1    | 2.41E-05 | 0.102 | - | - |
| ENSP00000286201 | FZD7    | 2.31E-05 | 0.102 | - | - |
| ENSP00000310800 | VANGL1  | 2.17E-05 | 0.102 | - | - |
| ENSP00000217423 | CST4    | 1.81E-05 | 0.102 | - | - |
| ENSP00000296280 | MASP1   | 1.63E-05 | 0.102 | - | - |
| ENSP00000262659 | CCM2L   | 1.41E-05 | 0.102 | - | - |
| ENSP00000223271 | RARRES2 | 1.37E-05 | 0.102 | - | - |
| ENSP00000254301 | LGALS3  | 2.49E-05 | 0.103 | - | - |
| ENSP00000226247 | FOXN1   | 2.38E-05 | 0.103 | - | - |
| ENSP00000328169 | JAG2    | 2.36E-05 | 0.103 | - | - |
| ENSP00000262101 | MSR1    | 2.27E-05 | 0.103 | - | - |
| ENSP00000354927 | MAP3K3  | 2.21E-05 | 0.103 | - | - |
| ENSP00000258349 | RC3H1   | 1.55E-05 | 0.103 | - | - |
| ENSP00000215855 | CRYBB3  | 1.52E-05 | 0.103 | - | - |
| ENSP00000221740 | CASP14  | 1.51E-05 | 0.103 | - | - |
| ENSP00000256785 | CFHR5   | 1.43E-05 | 0.103 | - | - |
| ENSP00000362013 | TRERF1  | 1.39E-05 | 0.103 | - | - |
| ENSP00000361021 | PTEN    | 1.07E-04 | 0.104 | - | - |
| ENSP00000246792 | RRAS    | 4.61E-05 | 0.104 | - | - |
| ENSP00000379213 | PTHLH   | 3.72E-05 | 0.104 | - | - |
| ENSP00000229335 | AICDA   | 3.27E-05 | 0.104 | - | - |
| ENSP00000218099 | F9      | 2.65E-05 | 0.104 | - | - |



|                 |          |          |       |   |   |
|-----------------|----------|----------|-------|---|---|
| ENSP00000310126 | LINGO2   | 2.39E-05 | 0.104 | - | - |
| ENSP00000370227 | AREGB    | 1.86E-05 | 0.104 | - | - |
| ENSP00000312652 | LEP      | 1.26E-04 | 0.105 | - | - |
| ENSP00000265724 | ABCB1    | 4.86E-05 | 0.105 | - | - |
| ENSP00000308176 | BTK      | 4.45E-05 | 0.105 | - | - |
| ENSP00000293379 | ITGA5    | 3.58E-05 | 0.105 | - | - |
| ENSP00000262776 | LGALS3BP | 2.11E-05 | 0.105 | - | - |
| ENSP00000261623 | CYBA     | 1.80E-05 | 0.105 | - | - |
| ENSP00000303507 | BCR      | 5.31E-05 | 0.106 | - | - |
| ENSP00000323036 | ACPP     | 4.80E-05 | 0.106 | - | - |
| ENSP00000352575 | INPP5D   | 3.83E-05 | 0.106 | - | - |
| ENSP00000347409 | KEL      | 2.67E-05 | 0.106 | - | - |
| ENSP00000253496 | F12      | 1.81E-05 | 0.106 | - | - |
| ENSP00000382707 | IFITM3   | 1.39E-05 | 0.106 | - | - |
| ENSP00000317087 | 8-Mar    | 1.21E-05 | 0.106 | - | - |
| ENSP00000310880 | MAL      | 1.13E-05 | 0.106 | - | - |
| ENSP00000390725 | HLA-DQA2 | 1.02E-05 | 0.106 | - | - |
| ENSP00000405833 | HLA-DQA2 | 1.02E-05 | 0.106 | - | - |
| ENSP00000245451 | BMP4     | 8.15E-05 | 0.107 | - | - |
| ENSP00000247668 | TRAF2    | 4.64E-05 | 0.107 | - | - |
| ENSP00000219700 | HMOX2    | 4.22E-05 | 0.107 | - | - |
| ENSP00000367830 | PRKCZ    | 3.77E-05 | 0.107 | - | - |

|                 |          |          |       |   |   |
|-----------------|----------|----------|-------|---|---|
| ENSP00000376544 | CD79B    | 2.42E-05 | 0.107 | - | - |
| ENSP00000217182 | EEF1A2   | 2.37E-05 | 0.107 | - | - |
| ENSP00000225941 | ABI3     | 2.27E-05 | 0.107 | - | - |
| ENSP00000264487 | AREG     | 1.88E-05 | 0.107 | - | - |
| ENSP00000338814 | BAG5     | 1.80E-05 | 0.107 | - | - |
| ENSP00000262971 | PIAS4    | 1.78E-05 | 0.107 | - | - |
| ENSP00000240617 | PLBD1    | 1.68E-05 | 0.107 | - | - |
| ENSP00000393198 | HES4     | 1.61E-05 | 0.107 | - | - |
| ENSP00000380514 | HAGH     | 1.41E-05 | 0.107 | - | - |
| ENSP00000288422 | TAB3     | 1.33E-05 | 0.107 | - | - |
| ENSP00000367130 | HES3     | 1.32E-05 | 0.107 | - | - |
| ENSP00000400695 | HLA-DQA2 | 1.02E-05 | 0.107 | - | - |
| ENSP00000304697 | UBB      | 8.21E-05 | 0.108 | - | - |
| ENSP00000375892 | AKT2     | 5.29E-05 | 0.108 | - | - |
| ENSP00000365466 | PSORS1C1 | 2.75E-05 | 0.108 | - | - |
| ENSP00000361366 | SFTPD    | 2.50E-05 | 0.108 | - | - |
| ENSP00000358106 | PREP     | 1.89E-05 | 0.108 | - | - |
| ENSP00000256196 | RRAS2    | 4.23E-05 | 0.109 | - | - |
| ENSP00000330237 | CASP9    | 3.73E-05 | 0.109 | - | - |
| ENSP00000240986 | GJA8     | 3.41E-05 | 0.109 | - | - |
| ENSP00000299166 | NDUFB8   | 3.22E-05 | 0.109 | - | - |
| ENSP00000306881 | SEC23A   | 2.93E-05 | 0.109 | - | - |

|                 |           |          |       |   |   |
|-----------------|-----------|----------|-------|---|---|
| ENSP00000364731 | F7        | 2.21E-05 | 0.109 | - | - |
| ENSP00000321674 | 4-Sep     | 1.97E-05 | 0.109 | - | - |
| ENSP00000262395 | TRAF4     | 1.74E-05 | 0.109 | - | - |
| ENSP00000291565 | PDXK      | 1.68E-05 | 0.109 | - | - |
| ENSP00000287641 | SST       | 6.24E-05 | 0.11  | - | - |
| ENSP00000400047 | POU5F1    | 3.92E-05 | 0.11  | - | - |
| ENSP00000329797 | CADM1     | 2.64E-05 | 0.11  | - | - |
| ENSP00000358126 | VPS45     | 2.30E-05 | 0.11  | - | - |
| ENSP00000357726 | S100A12   | 2.15E-05 | 0.11  | - | - |
| ENSP00000304987 | BFSP2     | 2.01E-05 | 0.11  | - | - |
| ENSP00000366404 | TRIM27    | 1.83E-05 | 0.11  | - | - |
| ENSP00000357656 | FYN       | 1.00E-04 | 0.111 | - | - |
| ENSP00000176183 | DRD4      | 3.39E-05 | 0.111 | - | - |
| ENSP00000346103 | GPX4      | 3.32E-05 | 0.111 | - | - |
| ENSP00000249041 | GALR3     | 2.91E-05 | 0.111 | - | - |
| ENSP00000295381 | ARHGAP25  | 2.58E-05 | 0.111 | - | - |
| ENSP00000164227 | BCL3      | 2.38E-05 | 0.111 | - | - |
| ENSP00000327943 | SLC5A2    | 1.94E-05 | 0.111 | - | - |
| ENSP00000349873 | HIST1H2AL | 1.32E-05 | 0.111 | - | - |
| ENSP00000335076 | EDARADD   | 1.17E-05 | 0.111 | - | - |
| ENSP00000358421 | HSD3B1    | 3.44E-05 | 0.112 | - | - |
| ENSP00000230301 | C6orf118  | 3.03E-05 | 0.112 | - | - |

|                 |         |          |       |   |   |
|-----------------|---------|----------|-------|---|---|
| ENSP00000249749 | DLL4    | 2.50E-05 | 0.112 | - | - |
| ENSP00000251390 | LILRA3  | 2.08E-05 | 0.112 | - | - |
| ENSP00000280097 | HNMT    | 1.84E-05 | 0.112 | - | - |
| ENSP00000369218 | RBM17   | 1.69E-05 | 0.112 | - | - |
| ENSP00000367104 | BFSP1   | 1.52E-05 | 0.112 | - | - |
| ENSP00000275169 | GPR6    | 1.45E-05 | 0.112 | - | - |
| ENSP00000346467 | LTBP1   | 1.20E-05 | 0.112 | - | - |
| ENSP00000257068 | MTNR1B  | 3.06E-05 | 0.113 | - | - |
| ENSP00000285407 | KLF10   | 2.67E-05 | 0.113 | - | - |
| ENSP00000288167 | IL17RB  | 1.69E-05 | 0.113 | - | - |
| ENSP00000265162 | ENPEP   | 1.39E-05 | 0.113 | - | - |
| ENSP00000292176 | ZBTB7B  | 1.14E-05 | 0.113 | - | - |
| ENSP00000302176 | ASPSCR1 | 3.02E-05 | 0.114 | - | - |
| ENSP00000304111 | ABCG4   | 2.85E-05 | 0.114 | - | - |
| ENSP00000286835 | SCAF4   | 2.25E-05 | 0.114 | - | - |
| ENSP00000305529 | SIRPG   | 2.10E-05 | 0.114 | - | - |
| ENSP00000291568 | CSTB    | 2.02E-05 | 0.114 | - | - |
| ENSP00000353072 | ATP2A3  | 2.00E-05 | 0.114 | - | - |
| ENSP00000356248 | PTPN7   | 1.70E-05 | 0.114 | - | - |
| ENSP00000221448 | SNRNP70 | 3.30E-05 | 0.115 | - | - |
| ENSP00000352936 | SPINK5  | 2.81E-05 | 0.115 | - | - |
| ENSP00000267843 | FGF7    | 2.80E-05 | 0.115 | - | - |

|                 |          |          |       |   |   |
|-----------------|----------|----------|-------|---|---|
| ENSP00000371790 | FGF9     | 2.18E-05 | 0.115 | - | - |
| ENSP00000376623 | CSH2     | 1.89E-05 | 0.115 | - | - |
| ENSP00000357594 | FAM26F   | 1.76E-05 | 0.115 | - | - |
| ENSP00000380598 | BLOC1S5  | 1.67E-05 | 0.115 | - | - |
| ENSP00000349275 | NRG1     | 3.39E-05 | 0.116 | - | - |
| ENSP00000373715 | DCP2     | 2.78E-05 | 0.116 | - | - |
| ENSP00000370697 | P2RY8    | 1.45E-05 | 0.116 | - | - |
| ENSP00000357158 | FCRL1    | 1.31E-05 | 0.116 | - | - |
| ENSP00000369666 | FBXL19   | 1.15E-05 | 0.116 | - | - |
| ENSP00000339692 | RASSF4   | 1.03E-05 | 0.116 | - | - |
| ENSP00000261340 | CLEC2D   | 1.02E-05 | 0.116 | - | - |
| ENSP00000353059 | APAF1    | 4.63E-05 | 0.117 | - | - |
| ENSP00000256857 | GRP      | 3.27E-05 | 0.117 | - | - |
| ENSP00000260408 | ADAM10   | 2.98E-05 | 0.117 | - | - |
| ENSP00000364126 | APEX2    | 2.29E-05 | 0.117 | - | - |
| ENSP00000337946 | PACRG    | 2.08E-05 | 0.117 | - | - |
| ENSP00000262031 | RBMS2    | 1.50E-05 | 0.117 | - | - |
| ENSP00000358470 | VTCN1    | 1.15E-05 | 0.117 | - | - |
| ENSP00000241802 | HLA-DQA2 | 1.02E-05 | 0.117 | - | - |
| ENSP00000315167 | ALOX12B  | 2.09E-05 | 0.118 | - | - |
| ENSP00000356382 | F13B     | 2.02E-05 | 0.118 | - | - |
| ENSP00000257600 | DTX1     | 1.56E-05 | 0.118 | - | - |

|                 |           |          |       |   |   |
|-----------------|-----------|----------|-------|---|---|
| ENSP00000271532 | FCRL4     | 1.52E-05 | 0.118 | - | - |
| ENSP00000161559 | CEACAM1   | 1.36E-05 | 0.118 | - | - |
| ENSP00000320176 | HCLS1     | 4.10E-05 | 0.119 | - | - |
| ENSP00000318486 | CDK5R1    | 2.77E-05 | 0.119 | - | - |
| ENSP00000337128 | EDN3      | 2.67E-05 | 0.119 | - | - |
| ENSP00000398278 | PSORS1C1  | 2.64E-05 | 0.119 | - | - |
| ENSP00000221973 | LIM2      | 2.21E-05 | 0.119 | - | - |
| ENSP00000364336 | TBXA2R    | 2.19E-05 | 0.119 | - | - |
| ENSP00000372991 | LTA       | 2.05E-05 | 0.119 | - | - |
| ENSP00000264376 | CRYGD     | 1.58E-05 | 0.119 | - | - |
| ENSP00000253719 | NAPSA     | 1.09E-05 | 0.119 | - | - |
| ENSP00000310275 | BANF1     | 3.86E-05 | 0.12  | - | - |
| ENSP00000240093 | FZD3      | 1.90E-05 | 0.12  | - | - |
| ENSP00000358795 | NEURL     | 1.41E-05 | 0.12  | - | - |
| ENSP00000385610 | MEX3C     | 1.36E-05 | 0.12  | - | - |
| ENSP00000342830 | RDX       | 3.38E-05 | 0.121 | - | - |
| ENSP00000341785 | ADIPOR1   | 1.65E-05 | 0.121 | - | - |
| ENSP00000351589 | HIST1H2AI | 1.35E-05 | 0.121 | - | - |
| ENSP00000329920 | C19orf59  | 1.26E-05 | 0.121 | - | - |
| ENSP00000275493 | EGFR      | 1.34E-04 | 0.122 | - | - |
| ENSP00000297436 | DEFA6     | 2.29E-05 | 0.122 | - | - |
| ENSP00000367609 | PABPN1L   | 1.65E-05 | 0.122 | - | - |

|                 |           |          |       |   |   |
|-----------------|-----------|----------|-------|---|---|
| ENSP00000293288 | BAX       | 4.78E-05 | 0.123 | - | - |
| ENSP00000272937 | HES6      | 1.69E-05 | 0.123 | - | - |
| ENSP00000352798 | COL18A1   | 3.22E-05 | 0.124 | - | - |
| ENSP00000337949 | HTR7      | 1.95E-05 | 0.124 | - | - |
| ENSP00000408395 | RBFOX3    | 1.84E-05 | 0.124 | - | - |
| ENSP00000227638 | PANX1     | 1.41E-05 | 0.124 | - | - |
| ENSP00000330307 | HIST1H2AK | 1.35E-05 | 0.124 | - | - |
| ENSP00000301873 | LTBP3     | 1.09E-05 | 0.124 | - | - |
| ENSP00000227155 | CD82      | 2.94E-05 | 0.125 | - | - |
| ENSP00000371798 | FSCN1     | 2.89E-05 | 0.125 | - | - |
| ENSP00000329890 | DEFA5     | 2.65E-05 | 0.125 | - | - |
| ENSP00000307706 | MT1E      | 1.54E-05 | 0.125 | - | - |
| ENSP00000260630 | CYP1B1    | 5.10E-05 | 0.126 | - | - |
| ENSP00000381293 | NSF       | 4.75E-05 | 0.126 | - | - |
| ENSP00000373106 | RNF39     | 2.74E-05 | 0.126 | - | - |
| ENSP00000373700 | ALK       | 2.68E-05 | 0.126 | - | - |
| ENSP00000263317 | NOX4      | 1.75E-05 | 0.126 | - | - |
| ENSP00000356146 | SCAF8     | 2.61E-05 | 0.127 | - | - |
| ENSP00000354929 | NOTCH2NL  | 5.78E-05 | 0.128 | - | - |
| ENSP00000250457 | EGLN3     | 2.03E-05 | 0.128 | - | - |
| ENSP00000245479 | SOX9      | 5.11E-05 | 0.129 | - | - |
| ENSP00000262965 | TCF3      | 4.78E-05 | 0.129 | - | - |

|                 |          |          |       |   |   |
|-----------------|----------|----------|-------|---|---|
| ENSP00000360683 | PTPN1    | 3.84E-05 | 0.129 | - | - |
| ENSP00000359787 | IFI44L   | 2.23E-05 | 0.129 | - | - |
| ENSP00000351605 | FZD6     | 2.13E-05 | 0.129 | - | - |
| ENSP00000327116 | EHD3     | 1.30E-05 | 0.129 | - | - |
| ENSP00000217740 | RNF125   | 1.03E-05 | 0.129 | - | - |
| ENSP00000263025 | MAPK3    | 9.11E-05 | 0.13  | - | - |
| ENSP00000358525 | NGF      | 8.69E-05 | 0.13  | - | - |
| ENSP00000266000 | DAXX     | 2.56E-05 | 0.13  | - | - |
| ENSP00000250018 | TPH1     | 2.51E-05 | 0.13  | - | - |
| ENSP00000401369 | ASB10    | 1.38E-05 | 0.13  | - | - |
| ENSP00000363433 | GPRIN2   | 1.21E-05 | 0.13  | - | - |
| ENSP00000222254 | PIK3R2   | 4.30E-05 | 0.131 | - | - |
| ENSP00000354859 | DRD2     | 4.23E-05 | 0.131 | - | - |
| ENSP00000268607 | MAP1LC3B | 2.92E-05 | 0.131 | - | - |
| ENSP00000361818 | SDC4     | 2.92E-05 | 0.131 | - | - |
| ENSP00000389813 | ACAD10   | 1.69E-05 | 0.131 | - | - |
| ENSP00000339933 | PKLR     | 4.42E-05 | 0.132 | - | - |
| ENSP00000350844 | PAX5     | 3.68E-05 | 0.132 | - | - |
| ENSP00000321326 | F2R      | 3.58E-05 | 0.132 | - | - |
| ENSP00000375035 | IGHV5-51 | 1.99E-05 | 0.132 | - | - |
| ENSP00000308452 | KRT17    | 1.96E-05 | 0.132 | - | - |
| ENSP00000348283 | WWP2     | 1.85E-05 | 0.132 | - | - |



|                 |          |          |       |   |   |
|-----------------|----------|----------|-------|---|---|
| ENSP00000225983 | HDAC5    | 3.51E-05 | 0.133 | - | - |
| ENSP00000262613 | SLC9A3R1 | 3.09E-05 | 0.133 | - | - |
| ENSP00000242338 | CNTFR    | 1.77E-05 | 0.133 | - | - |
| ENSP00000338358 | SERPINB6 | 1.43E-05 | 0.133 | - | - |
| ENSP00000381486 | NOTO     | 1.04E-05 | 0.133 | - | - |
| ENSP00000313731 | PLCD3    | 2.95E-05 | 0.134 | - | - |
| ENSP00000342392 | MESP2    | 1.78E-05 | 0.134 | - | - |
| ENSP00000320447 | NR2C2    | 1.46E-05 | 0.134 | - | - |
| ENSP00000220764 | DECR1    | 6.46E-05 | 0.135 | - | - |
| ENSP00000321845 | SEC24C   | 2.87E-05 | 0.135 | - | - |
| ENSP00000362570 | FNDC5    | 1.96E-05 | 0.135 | - | - |
| ENSP00000365103 | DAOA     | 1.32E-05 | 0.135 | - | - |
| ENSP00000355133 | NOS1AP   | 1.28E-05 | 0.135 | - | - |
| ENSP00000354032 | BSCL2    | 1.23E-05 | 0.135 | - | - |
| ENSP00000333203 | SERPINA5 | 2.09E-05 | 0.136 | - | - |
| ENSP00000299502 | SERPINB2 | 1.34E-05 | 0.136 | - | - |
| ENSP00000249598 | GDF2     | 1.27E-05 | 0.136 | - | - |
| ENSP00000308541 | F2       | 6.54E-05 | 0.137 | - | - |
| ENSP00000383411 | SAMSN1   | 1.75E-05 | 0.137 | - | - |
| ENSP00000236938 | FCRLA    | 1.31E-05 | 0.137 | - | - |
| ENSP00000300209 | METTL21B | 1.31E-05 | 0.137 | - | - |
| ENSP00000360635 | DPP7     | 1.04E-05 | 0.137 | - | - |

|                 |          |          |       |   |   |
|-----------------|----------|----------|-------|---|---|
| ENSP00000287820 | PPARG    | 8.12E-05 | 0.138 | - | - |
| ENSP00000414303 | BDNF     | 6.32E-05 | 0.138 | - | - |
| ENSP00000245919 | FOSB     | 2.57E-05 | 0.138 | - | - |
| ENSP00000288071 | DDX19B   | 2.45E-05 | 0.138 | - | - |
| ENSP00000304501 | ADORA2B  | 1.98E-05 | 0.138 | - | - |
| ENSP00000338934 | EZR      | 4.98E-05 | 0.139 | - | - |
| ENSP00000227880 | SLC15A3  | 3.76E-05 | 0.139 | - | - |
| ENSP00000319984 | CHRM2    | 3.08E-05 | 0.139 | - | - |
| ENSP00000291554 | CRYAA    | 2.74E-05 | 0.139 | - | - |
| ENSP00000269300 | PIK3R5   | 2.33E-05 | 0.139 | - | - |
| ENSP00000256178 | LYVE1    | 2.26E-05 | 0.139 | - | - |
| ENSP00000282849 | ADAMTS18 | 1.33E-05 | 0.139 | - | - |
| ENSP00000215659 | MAPK12   | 2.78E-05 | 0.14  | - | - |
| ENSP00000284719 | OLA1     | 2.47E-05 | 0.14  | - | - |
| ENSP00000234071 | PROC     | 2.05E-05 | 0.14  | - | - |
| ENSP00000328405 | DGKA     | 1.61E-05 | 0.14  | - | - |
| ENSP00000264790 | MMRN1    | 1.58E-05 | 0.14  | - | - |
| ENSP00000379891 | AP1S3    | 1.06E-05 | 0.14  | - | - |
| ENSP00000301295 | NLRP4    | 1.03E-05 | 0.14  | - | - |
| ENSP00000172229 | NGFR     | 3.72E-05 | 0.141 | - | - |
| ENSP00000231061 | SPARC    | 3.56E-05 | 0.141 | - | - |
| ENSP00000320758 | NOS1     | 2.97E-05 | 0.141 | - | - |

|                 |          |          |       |   |   |
|-----------------|----------|----------|-------|---|---|
| ENSP00000352802 | WIPF1    | 1.96E-05 | 0.141 | - | - |
| ENSP00000280358 | TEX12    | 1.27E-05 | 0.141 | - | - |
| ENSP00000303315 | JUNB     | 3.50E-05 | 0.142 | - | - |
| ENSP00000205948 | APOH     | 3.42E-05 | 0.142 | - | - |
| ENSP00000295095 | ARHGAP15 | 2.70E-05 | 0.142 | - | - |
| ENSP00000308610 | GPD2     | 2.36E-05 | 0.142 | - | - |
| ENSP00000384442 | CDK11A   | 1.97E-05 | 0.142 | - | - |
| ENSP00000267169 | DIABLO   | 1.87E-05 | 0.142 | - | - |
| ENSP00000256412 | ADAMDEC1 | 1.39E-05 | 0.142 | - | - |
| ENSP00000381436 | VGLL3    | 1.11E-05 | 0.142 | - | - |
| ENSP00000332326 | TNFAIP2  | 1.09E-05 | 0.142 | - | - |
| ENSP00000289902 | FCER1G   | 3.95E-05 | 0.143 | - | - |
| ENSP00000283195 | RANBP2   | 3.01E-05 | 0.143 | - | - |
| ENSP00000393007 | TCF19    | 1.65E-05 | 0.143 | - | - |
| ENSP00000256474 | VHL      | 2.89E-05 | 0.144 | - | - |
| ENSP00000345785 | FZD9     | 1.90E-05 | 0.144 | - | - |
| ENSP00000361458 | TSC22D3  | 1.37E-05 | 0.144 | - | - |
| ENSP00000339730 | THBS4    | 1.68E-05 | 0.145 | - | - |
| ENSP00000261879 | APH1B    | 1.59E-05 | 0.145 | - | - |
| ENSP00000380066 | MAP4K1   | 1.42E-05 | 0.145 | - | - |
| ENSP00000342385 | PTGES    | 1.11E-05 | 0.145 | - | - |
| ENSP00000369636 | PXDC1    | 1.03E-05 | 0.145 | - | - |

|                 |          |          |       |   |   |
|-----------------|----------|----------|-------|---|---|
| ENSP00000317272 | MET      | 4.01E-05 | 0.146 | - | - |
| ENSP00000321853 | SERPINF2 | 3.37E-05 | 0.146 | - | - |
| ENSP00000340305 | UBE2V1   | 1.63E-05 | 0.146 | - | - |
| ENSP00000344115 | CDH5     | 3.26E-05 | 0.147 | - | - |
| ENSP00000296452 | BSN      | 2.22E-05 | 0.147 | - | - |
| ENSP00000382213 | DSPP     | 1.77E-05 | 0.147 | - | - |
| ENSP00000262366 | GLIS2    | 1.50E-05 | 0.147 | - | - |
| ENSP00000360997 | ADAMTS13 | 1.23E-05 | 0.147 | - | - |
| ENSP00000315112 | RNF31    | 1.12E-05 | 0.147 | - | - |
| ENSP00000260643 | PREB     | 2.50E-05 | 0.148 | - | - |
| ENSP00000252491 | APOC1    | 1.53E-05 | 0.148 | - | - |
| ENSP00000350369 | MAFG     | 1.06E-05 | 0.148 | - | - |
| ENSP00000340523 | NMNAT3   | 2.42E-05 | 0.149 | - | - |
| ENSP00000403447 | NOTCH4   | 2.21E-05 | 0.149 | - | - |
| ENSP00000291294 | PTGIR    | 1.75E-05 | 0.149 | - | - |
| ENSP00000301653 | KRT16    | 1.66E-05 | 0.149 | - | - |
| ENSP00000371693 | TNFRSF19 | 1.45E-05 | 0.149 | - | - |
| ENSP00000297770 | CPA6     | 1.20E-05 | 0.149 | - | - |
| ENSP00000234313 | PLEK     | 7.59E-05 | 0.15  | - | - |
| ENSP00000295731 | IHH      | 4.42E-05 | 0.15  | - | - |
| ENSP00000305372 | ADRB2    | 3.32E-05 | 0.15  | - | - |
| ENSP00000276594 | PRDM14   | 1.61E-05 | 0.15  | - | - |

|                 |          |          |       |   |   |
|-----------------|----------|----------|-------|---|---|
| ENSP00000349629 | LRBA     | 1.56E-05 | 0.15  | - | - |
| ENSP00000160740 | CIC      | 1.32E-05 | 0.15  | - | - |
| ENSP00000347329 | SEC31A   | 2.81E-05 | 0.151 | - | - |
| ENSP00000254667 | PTPRE    | 1.19E-05 | 0.151 | - | - |
| ENSP00000312122 | SEC13    | 3.31E-05 | 0.152 | - | - |
| ENSP00000259030 | RTP4     | 2.77E-05 | 0.152 | - | - |
| ENSP00000349588 | ANK2     | 1.60E-05 | 0.152 | - | - |
| ENSP00000400010 | PTPRJ    | 1.16E-05 | 0.152 | - | - |
| ENSP00000262262 | CD33     | 1.11E-05 | 0.152 | - | - |
| ENSP00000342136 | CREB3    | 1.03E-05 | 0.152 | - | - |
| ENSP00000299402 | APBB1    | 2.91E-05 | 0.153 | - | - |
| ENSP00000417899 | MECOM    | 2.06E-05 | 0.153 | - | - |
| ENSP00000359042 | PRPF38B  | 4.70E-05 | 0.154 | - | - |
| ENSP00000315955 | FOXA2    | 3.63E-05 | 0.154 | - | - |
| ENSP00000259881 | PSORS1C1 | 2.28E-05 | 0.154 | - | - |
| ENSP00000238633 | NPC2     | 2.06E-05 | 0.154 | - | - |
| ENSP00000261007 | CHRNA1   | 1.46E-05 | 0.154 | - | - |
| ENSP00000377192 | G6PD     | 3.45E-05 | 0.155 | - | - |
| ENSP00000243924 | PI3      | 2.74E-05 | 0.155 | - | - |
| ENSP00000361382 | SFTPA1   | 1.95E-05 | 0.155 | - | - |
| ENSP00000167218 | PDCD2    | 1.74E-05 | 0.155 | - | - |
| ENSP00000249364 | CALU     | 1.63E-05 | 0.155 | - | - |

|                 |           |          |       |   |   |
|-----------------|-----------|----------|-------|---|---|
| ENSP00000301887 | BATF2     | 1.14E-05 | 0.155 | - | - |
| ENSP00000227378 | HSPA8     | 4.40E-05 | 0.156 | - | - |
| ENSP00000350928 | GAD1      | 4.32E-05 | 0.156 | - | - |
| ENSP00000294016 | ADCY9     | 3.72E-05 | 0.156 | - | - |
| ENSP00000354130 | SOX10     | 3.13E-05 | 0.156 | - | - |
| ENSP00000272163 | LBR       | 2.57E-05 | 0.156 | - | - |
| ENSP00000306490 | CHRM1     | 2.32E-05 | 0.156 | - | - |
| ENSP00000276431 | TNFRSF10B | 1.87E-05 | 0.156 | - | - |
| ENSP00000245407 | SLC22A5   | 1.41E-05 | 0.156 | - | - |
| ENSP00000288943 | DUSP2     | 1.33E-05 | 0.156 | - | - |
| ENSP00000241014 | MAPK8IP1  | 1.27E-05 | 0.156 | - | - |
| ENSP00000275198 | TAAR6     | 1.19E-05 | 0.156 | - | - |
| ENSP00000318585 | BACE1     | 4.78E-05 | 0.157 | - | - |
| ENSP00000337797 | PIDD      | 2.37E-05 | 0.157 | - | - |
| ENSP00000398677 | TRIM31    | 2.01E-05 | 0.157 | - | - |
| ENSP00000245457 | PTGER2    | 1.94E-05 | 0.157 | - | - |
| ENSP00000367177 | PCDH8     | 1.29E-05 | 0.157 | - | - |
| ENSP00000180166 | FGF20     | 1.14E-05 | 0.157 | - | - |
| ENSP00000287934 | FZD1      | 2.49E-05 | 0.158 | - | - |
| ENSP00000053867 | GRN       | 2.37E-05 | 0.158 | - | - |
| ENSP00000264009 | HSF4      | 1.83E-05 | 0.158 | - | - |
| ENSP00000306106 | JAGN1     | 1.12E-05 | 0.158 | - | - |

|                 |        |          |       |   |   |
|-----------------|--------|----------|-------|---|---|
| ENSP00000334564 | POLR3C | 3.32E-05 | 0.159 | - | - |
| ENSP00000221130 | GSR    | 3.06E-05 | 0.16  | - | - |
| ENSP00000353512 | PARP9  | 2.80E-05 | 0.16  | - | - |
| ENSP00000391311 | 5-Sep  | 2.50E-05 | 0.16  | - | - |
| ENSP00000248444 | VIL1   | 2.26E-05 | 0.16  | - | - |
| ENSP00000356186 | LAX1   | 1.59E-05 | 0.16  | - | - |
| ENSP00000301202 | LAIR2  | 1.33E-05 | 0.16  | - | - |
| ENSP00000410649 | MAS1L  | 1.08E-05 | 0.16  | - | - |
| ENSP00000357307 | SYT11  | 1.91E-05 | 0.161 | - | - |
| ENSP00000331504 | FES    | 1.62E-05 | 0.161 | - | - |
| ENSP00000356058 | FAIM3  | 1.24E-05 | 0.161 | - | - |
| ENSP00000326500 | IL11RA | 1.06E-05 | 0.161 | - | - |
| ENSP00000364943 | DDAH2  | 1.03E-05 | 0.161 | - | - |
| ENSP00000269305 | TP53   | 1.86E-04 | 0.162 | - | - |
| ENSP00000257290 | PDGFRA | 3.31E-05 | 0.163 | - | - |
| ENSP00000256759 | FST    | 3.22E-05 | 0.163 | - | - |
| ENSP00000357392 | EFNA1  | 1.80E-05 | 0.163 | - | - |
| ENSP00000233997 | AZU1   | 1.67E-05 | 0.163 | - | - |
| ENSP00000370867 | TGM3   | 1.56E-05 | 0.163 | - | - |
| ENSP00000366248 | CORT   | 1.46E-05 | 0.163 | - | - |
| ENSP00000369317 | KRT6A  | 1.33E-05 | 0.163 | - | - |
| ENSP00000362777 | ATOH7  | 1.29E-05 | 0.163 | - | - |

|                 |        |          |       |   |   |
|-----------------|--------|----------|-------|---|---|
| ENSP00000331766 | CLECL1 | 1.19E-05 | 0.163 | - | - |
| ENSP00000317271 | MCFD2  | 1.12E-05 | 0.163 | - | - |
| ENSP00000302413 | TPST1  | 1.00E-05 | 0.163 | - | - |
| ENSP00000363827 | HSPG2  | 4.51E-05 | 0.164 | - | - |
| ENSP00000359424 | CHUK   | 3.89E-05 | 0.164 | - | - |
| ENSP00000278175 | ADM    | 2.54E-05 | 0.164 | - | - |
| ENSP00000262435 | SMURF2 | 2.14E-05 | 0.164 | - | - |
| ENSP00000295256 | HPGDS  | 1.82E-05 | 0.164 | - | - |
| ENSP00000264072 | FCER2  | 1.48E-05 | 0.164 | - | - |
| ENSP00000261537 | MIB1   | 1.26E-05 | 0.164 | - | - |
| ENSP00000363826 | FZD8   | 2.29E-05 | 0.165 | - | - |
| ENSP00000405041 | POU5F1 | 5.14E-05 | 0.166 | - | - |
| ENSP00000345083 | MAP2K3 | 2.49E-05 | 0.166 | - | - |
| ENSP00000371372 | ATP12A | 2.02E-05 | 0.166 | - | - |
| ENSP00000340983 | LRRC25 | 1.88E-05 | 0.166 | - | - |
| ENSP00000352565 | HAND2  | 1.65E-05 | 0.166 | - | - |
| ENSP00000260264 | POU2F3 | 1.27E-05 | 0.166 | - | - |
| ENSP00000322804 | MTSS1  | 1.01E-05 | 0.166 | - | - |
| ENSP00000353344 | ETS2   | 2.08E-05 | 0.167 | - | - |
| ENSP00000229030 | FZD10  | 1.98E-05 | 0.167 | - | - |
| ENSP00000259726 | CDSN   | 1.97E-05 | 0.167 | - | - |
| ENSP00000329213 | SIVA1  | 1.13E-05 | 0.167 | - | - |



|                 |          |          |       |   |   |
|-----------------|----------|----------|-------|---|---|
| ENSP00000262445 | MAP2K4   | 3.40E-05 | 0.168 | - | - |
| ENSP00000261023 | ITGAV    | 3.16E-05 | 0.168 | - | - |
| ENSP00000365131 | BAG6     | 2.31E-05 | 0.168 | - | - |
| ENSP00000309771 | P2RY6    | 2.15E-05 | 0.168 | - | - |
| ENSP00000262865 | BPI      | 1.38E-05 | 0.168 | - | - |
| ENSP00000270223 | DMWD     | 1.29E-05 | 0.168 | - | - |
| ENSP00000291971 | NLRP8    | 1.18E-05 | 0.168 | - | - |
| ENSP00000305714 | BMP1     | 2.49E-05 | 0.169 | - | - |
| ENSP00000363360 | INIP     | 1.85E-05 | 0.169 | - | - |
| ENSP00000377401 | SLC35B2  | 1.26E-05 | 0.169 | - | - |
| ENSP00000274532 | TIMD4    | 1.01E-05 | 0.169 | - | - |
| ENSP00000362092 | RRAGC    | 1.00E-05 | 0.169 | - | - |
| ENSP00000391685 | TRIM31   | 2.02E-05 | 0.17  | - | - |
| ENSP00000327214 | ATP13A2  | 1.98E-05 | 0.17  | - | - |
| ENSP00000279488 | DUSP6    | 1.69E-05 | 0.171 | - | - |
| ENSP00000387768 | HLA-DQA2 | 2.05E-05 | 0.172 | - | - |
| ENSP00000276571 | CRH      | 3.58E-05 | 0.173 | - | - |
| ENSP00000259915 | POU5F1   | 2.73E-05 | 0.173 | - | - |
| ENSP00000311469 | GSTM1    | 2.58E-05 | 0.173 | - | - |
| ENSP00000361311 | TMEM53   | 1.84E-05 | 0.173 | - | - |
| ENSP00000319610 | NPAS3    | 1.52E-05 | 0.173 | - | - |
| ENSP00000339813 | TPST2    | 1.03E-05 | 0.173 | - | - |

|                 |         |          |       |   |   |
|-----------------|---------|----------|-------|---|---|
| ENSP00000348635 | AMICA1  | 3.16E-05 | 0.174 | - | - |
| ENSP00000278282 | SCGB1A1 | 2.42E-05 | 0.174 | - | - |
| ENSP00000266041 | ITIH4   | 1.82E-05 | 0.174 | - | - |
| ENSP00000411397 | MARK3   | 1.61E-05 | 0.174 | - | - |
| ENSP00000406229 | FAT1    | 1.54E-05 | 0.174 | - | - |
| ENSP00000245912 | TNFSF14 | 1.37E-05 | 0.174 | - | - |
| ENSP00000269439 | RNF165  | 1.21E-05 | 0.174 | - | - |
| ENSP00000264634 | WNT5A   | 2.16E-05 | 0.175 | - | - |
| ENSP00000312664 | CASP2   | 1.58E-05 | 0.175 | - | - |
| ENSP00000412283 | IER3    | 1.52E-05 | 0.175 | - | - |
| ENSP00000347184 | HTT     | 3.37E-05 | 0.176 | - | - |
| ENSP00000314774 | HES7    | 1.91E-05 | 0.176 | - | - |
| ENSP00000313084 | EGFLAM  | 1.74E-05 | 0.176 | - | - |
| ENSP00000260723 | BTBD16  | 1.54E-05 | 0.176 | - | - |
| ENSP00000349428 | PTBP1   | 2.72E-05 | 0.177 | - | - |
| ENSP00000252242 | KRT5    | 2.41E-05 | 0.177 | - | - |
| ENSP00000301420 | KLK1    | 1.63E-05 | 0.177 | - | - |
| ENSP00000303575 | NUDT9   | 1.32E-05 | 0.177 | - | - |
| ENSP00000262866 | SLA2    | 1.14E-05 | 0.177 | - | - |
| ENSP00000318822 | BID     | 1.12E-05 | 0.177 | - | - |
| ENSP00000301411 | NTF4    | 1.04E-05 | 0.177 | - | - |
| ENSP00000219255 | PARD6A  | 2.62E-05 | 0.178 | - | - |

|                 |          |          |       |   |   |
|-----------------|----------|----------|-------|---|---|
| ENSP00000268097 | HEXA     | 2.33E-05 | 0.178 | - | - |
| ENSP00000366593 | TMEM201  | 1.59E-05 | 0.178 | - | - |
| ENSP00000349041 | NRARP    | 1.29E-05 | 0.178 | - | - |
| ENSP00000271915 | KCNN3    | 1.04E-05 | 0.178 | - | - |
| ENSP00000417300 | TRBC2    | 4.48E-05 | 0.179 | - | - |
| ENSP00000374985 | IGHG4    | 1.75E-05 | 0.179 | - | - |
| ENSP00000362014 | DNM1     | 2.42E-05 | 0.18  | - | - |
| ENSP00000261822 | BCL7A    | 1.25E-05 | 0.18  | - | - |
| ENSP00000363708 | BMPR2    | 3.11E-05 | 0.181 | - | - |
| ENSP00000283147 | BMP6     | 1.97E-05 | 0.181 | - | - |
| ENSP00000314480 | UNCX     | 1.29E-05 | 0.181 | - | - |
| ENSP00000248996 | GNAZ     | 2.30E-05 | 0.182 | - | - |
| ENSP00000277508 | PAEP     | 1.01E-05 | 0.182 | - | - |
| ENSP00000394134 | C6orf100 | 1.85E-05 | 0.183 | - | - |
| ENSP00000396675 | C6orf100 | 1.85E-05 | 0.183 | - | - |
| ENSP00000306662 | ADRA1B   | 1.77E-05 | 0.183 | - | - |
| ENSP00000262160 | SMAD2    | 6.45E-05 | 0.184 | - | - |
| ENSP00000301633 | BIRC5    | 5.02E-05 | 0.184 | - | - |
| ENSP00000345206 | RBPJ     | 4.08E-05 | 0.184 | - | - |
| ENSP00000415793 | MUC5B    | 3.89E-05 | 0.184 | - | - |
| ENSP00000352708 | TRAPPC2  | 2.49E-05 | 0.184 | - | - |
| ENSP00000306279 | UMOD     | 2.21E-05 | 0.184 | - | - |

|                 |         |          |       |   |   |
|-----------------|---------|----------|-------|---|---|
| ENSP00000394700 | SYT16   | 1.93E-05 | 0.184 | - | - |
| ENSP00000337340 | MED19   | 1.60E-05 | 0.184 | - | - |
| ENSP00000357348 | HEY2    | 1.33E-05 | 0.184 | - | - |
| ENSP00000354158 | ERC1    | 1.96E-05 | 0.185 | - | - |
| ENSP00000342828 | NKX2-3  | 1.79E-05 | 0.185 | - | - |
| ENSP00000381333 | CRHR1   | 1.63E-05 | 0.185 | - | - |
| ENSP00000344223 | MBTPS1  | 1.04E-05 | 0.185 | - | - |
| ENSP00000332973 | SMAD3   | 5.51E-05 | 0.186 | - | - |
| ENSP00000321106 | TAC1    | 4.56E-05 | 0.186 | - | - |
| ENSP00000360687 | PTGDS   | 2.31E-05 | 0.186 | - | - |
| ENSP00000244930 | SCGB2A1 | 1.26E-05 | 0.186 | - | - |
| ENSP00000341342 | KLHL6   | 1.09E-05 | 0.186 | - | - |
| ENSP00000219548 | STUB1   | 3.47E-05 | 0.187 | - | - |
| ENSP00000367570 | PHF11   | 2.07E-05 | 0.187 | - | - |
| ENSP00000264658 | FBXL20  | 1.55E-05 | 0.187 | - | - |
| ENSP00000355010 | IGSF1   | 1.28E-05 | 0.187 | - | - |
| ENSP00000358596 | DUSP5   | 1.14E-05 | 0.187 | - | - |
| ENSP00000308219 | RGMB    | 1.14E-05 | 0.187 | - | - |
| ENSP00000263100 | A1BG    | 1.08E-05 | 0.187 | - | - |
| ENSP00000382362 | PHB2    | 4.81E-05 | 0.188 | - | - |
| ENSP00000404623 | DAXX    | 1.99E-05 | 0.188 | - | - |
| ENSP00000300456 | SLC27A4 | 1.94E-05 | 0.188 | - | - |

|                 |          |          |       |   |   |
|-----------------|----------|----------|-------|---|---|
| ENSP00000250066 | USP6     | 1.33E-05 | 0.188 | - | - |
| ENSP00000353508 | MAP2     | 2.57E-05 | 0.189 | - | - |
| ENSP00000381648 | PIAS2    | 1.91E-05 | 0.189 | - | - |
| ENSP00000355629 | COG2     | 1.57E-05 | 0.189 | - | - |
| ENSP00000085068 | ISOC2    | 1.48E-05 | 0.189 | - | - |
| ENSP00000280154 | PDCD4    | 1.38E-05 | 0.189 | - | - |
| ENSP00000347836 | UBE2H    | 3.74E-05 | 0.19  | - | - |
| ENSP00000401317 | TUBB     | 2.00E-05 | 0.19  | - | - |
| ENSP00000164024 | CELSR3   | 1.65E-05 | 0.19  | - | - |
| ENSP00000387091 | ZNF365   | 1.45E-05 | 0.19  | - | - |
| ENSP00000362555 | RNF19B   | 1.38E-05 | 0.19  | - | - |
| ENSP00000319141 | CYBRD1   | 1.19E-05 | 0.19  | - | - |
| ENSP00000274026 | CCNA2    | 4.19E-05 | 0.191 | - | - |
| ENSP00000363787 | RING1    | 2.20E-05 | 0.191 | - | - |
| ENSP00000377380 | ARHGAP9  | 2.10E-05 | 0.191 | - | - |
| ENSP00000306461 | SPRR1B   | 1.98E-05 | 0.191 | - | - |
| ENSP00000339004 | FOXG1    | 1.73E-05 | 0.191 | - | - |
| ENSP00000375622 | LAIR1    | 1.27E-05 | 0.191 | - | - |
| ENSP00000329554 | HIST1H3I | 1.26E-05 | 0.191 | - | - |
| ENSP00000265175 | SEC24B   | 3.51E-05 | 0.192 | - | - |
| ENSP00000248923 | GGT1     | 3.48E-05 | 0.192 | - | - |
| ENSP00000363397 | UGCG     | 2.49E-05 | 0.192 | - | - |

|                 |          |          |       |   |   |
|-----------------|----------|----------|-------|---|---|
| ENSP00000264674 | MECOM    | 2.05E-05 | 0.192 | - | - |
| ENSP00000327824 | IFNLR1   | 1.47E-05 | 0.192 | - | - |
| ENSP00000331746 | CALCA    | 3.89E-05 | 0.193 | - | - |
| ENSP00000359539 | GOT1     | 3.21E-05 | 0.193 | - | - |
| ENSP00000357643 | MKI67    | 2.63E-05 | 0.193 | - | - |
| ENSP00000292896 | HBE1     | 2.25E-05 | 0.193 | - | - |
| ENSP00000222266 | PSENEN   | 1.83E-05 | 0.193 | - | - |
| ENSP00000374989 | IGHA1    | 2.37E-05 | 0.194 | - | - |
| ENSP00000410635 | C6orf100 | 1.87E-05 | 0.194 | - | - |
| ENSP00000302486 | MAP2K1   | 3.14E-05 | 0.195 | - | - |
| ENSP00000361878 | CAP1     | 2.73E-05 | 0.195 | - | - |
| ENSP00000353073 | CLN3     | 2.13E-05 | 0.195 | - | - |
| ENSP00000375009 | IGHV3-9  | 2.09E-05 | 0.195 | - | - |
| ENSP00000365747 | PQBP1    | 1.59E-05 | 0.195 | - | - |
| ENSP00000358423 | RRAGD    | 1.00E-05 | 0.195 | - | - |
| ENSP00000319377 | NLRP12   | 1.89E-05 | 0.196 | - | - |
| ENSP00000287437 | NSMCE2   | 1.26E-05 | 0.196 | - | - |
| ENSP00000369981 | SH3GL2   | 2.78E-05 | 0.197 | - | - |
| ENSP00000295108 | NEUROD1  | 2.49E-05 | 0.197 | - | - |
| ENSP00000339001 | TUBB     | 1.98E-05 | 0.197 | - | - |
| ENSP00000261769 | CDH1     | 8.50E-05 | 0.198 | - | - |
| ENSP00000300161 | YWHAB    | 4.77E-05 | 0.198 | - | - |

|                 |           |          |       |   |   |
|-----------------|-----------|----------|-------|---|---|
| ENSP00000360798 | EPS15     | 4.05E-05 | 0.198 | - | - |
| ENSP00000222381 | PON1      | 2.37E-05 | 0.198 | - | - |
| ENSP00000219334 | SMPD3     | 2.14E-05 | 0.198 | - | - |
| ENSP00000379612 | TAX1BP1   | 1.60E-05 | 0.198 | - | - |
| ENSP00000311733 | CMKLR1    | 1.56E-05 | 0.198 | - | - |
| ENSP00000360968 | CYP4X1    | 3.86E-05 | 0.199 | - | - |
| ENSP00000370376 | DUT       | 2.64E-05 | 0.199 | - | - |
| ENSP00000296677 | F2RL1     | 2.43E-05 | 0.199 | - | - |
| ENSP00000359019 | PITX3     | 1.89E-05 | 0.199 | - | - |
| ENSP00000258787 | MYO1G     | 1.05E-05 | 0.199 | - | - |
| ENSP00000262510 | NLRC5     | 1.00E-05 | 0.199 | - | - |
| ENSP00000294304 | LRP5      | 2.79E-05 | 0.2   | - | - |
| ENSP00000222573 | ITGB8     | 2.02E-05 | 0.2   | - | - |
| ENSP00000349359 | SASH3     | 1.94E-05 | 0.2   | - | - |
| ENSP00000356789 | ATP1B1    | 1.22E-05 | 0.2   | - | - |
| ENSP00000209540 | OR111     | 2.05E-05 | 0.201 | - | - |
| ENSP00000350914 | BDH1      | 1.53E-05 | 0.201 | - | - |
| ENSP00000221132 | TNFRSF10A | 1.28E-05 | 0.201 | - | - |
| ENSP00000379204 | BMP7      | 2.93E-05 | 0.202 | - | - |
| ENSP00000361845 | ZMPSTE24  | 1.91E-05 | 0.202 | - | - |
| ENSP00000365514 | ZIC2      | 1.51E-05 | 0.202 | - | - |
| ENSP00000339399 | CRYZ      | 3.08E-05 | 0.203 | - | - |

|                 |         |          |       |   |   |
|-----------------|---------|----------|-------|---|---|
| ENSP00000371393 | PGM2    | 1.65E-05 | 0.203 | - | - |
| ENSP00000374981 | IGHA2   | 1.61E-05 | 0.203 | - | - |
| ENSP00000377344 | DDX60   | 1.61E-05 | 0.203 | - | - |
| ENSP00000308733 | GPR151  | 1.14E-05 | 0.203 | - | - |
| ENSP00000338207 | LMO1    | 1.66E-05 | 0.204 | - | - |
| ENSP00000310219 | HSPA6   | 1.34E-05 | 0.204 | - | - |
| ENSP00000336927 | ALDOA   | 2.66E-05 | 0.205 | - | - |
| ENSP00000362948 | MED18   | 1.77E-05 | 0.205 | - | - |
| ENSP00000222304 | HAMP    | 1.68E-05 | 0.205 | - | - |
| ENSP00000364709 | F10     | 2.95E-05 | 0.206 | - | - |
| ENSP00000307445 | LTB4R   | 1.78E-05 | 0.206 | - | - |
| ENSP00000370256 | FOXC1   | 1.37E-05 | 0.206 | - | - |
| ENSP00000295206 | EN1     | 2.01E-05 | 0.207 | - | - |
| ENSP00000257963 | ACVR1B  | 1.73E-05 | 0.207 | - | - |
| ENSP00000298556 | HPRT1   | 2.65E-05 | 0.208 | - | - |
| ENSP00000376848 | PRIMA1  | 1.17E-05 | 0.208 | - | - |
| ENSP00000254801 | IGJ     | 1.03E-05 | 0.208 | - | - |
| ENSP00000307046 | SDC2    | 4.15E-05 | 0.209 | - | - |
| ENSP00000340409 | SMPD1   | 2.23E-05 | 0.209 | - | - |
| ENSP00000302251 | GBX2    | 1.51E-05 | 0.209 | - | - |
| ENSP00000363390 | TRIM63  | 1.40E-05 | 0.209 | - | - |
| ENSP00000377112 | SLC12A8 | 1.08E-05 | 0.209 | - | - |



|                 |          |          |       |   |   |
|-----------------|----------|----------|-------|---|---|
| ENSP00000374777 | IGKC     | 4.29E-05 | 0.21  | - | - |
| ENSP00000262623 | ATP4A    | 1.90E-05 | 0.21  | - | - |
| ENSP00000342235 | ERBB4    | 4.29E-05 | 0.211 | - | - |
| ENSP00000302216 | ATOH1    | 1.67E-05 | 0.211 | - | - |
| ENSP00000322542 | GTF2I    | 1.93E-05 | 0.212 | - | - |
| ENSP00000304467 | THOP1    | 1.89E-05 | 0.212 | - | - |
| ENSP00000264668 | MTRR     | 1.18E-05 | 0.212 | - | - |
| ENSP00000265192 | PAIP2    | 1.01E-05 | 0.212 | - | - |
| ENSP00000225577 | RPS6KB1  | 3.19E-05 | 0.213 | - | - |
| ENSP00000360025 | GADD45A  | 2.70E-05 | 0.213 | - | - |
| ENSP00000410715 | SFRP4    | 2.58E-05 | 0.213 | - | - |
| ENSP00000355751 | THBS2    | 2.24E-05 | 0.213 | - | - |
| ENSP00000301607 | EVPL     | 1.34E-05 | 0.213 | - | - |
| ENSP00000322276 | VNN2     | 1.27E-05 | 0.213 | - | - |
| ENSP00000301761 | SDHAF2   | 1.22E-05 | 0.213 | - | - |
| ENSP00000256999 | FOLH1    | 1.18E-05 | 0.213 | - | - |
| ENSP00000257189 | DSG3     | 1.13E-05 | 0.213 | - | - |
| ENSP00000318057 | EGR3     | 1.58E-05 | 0.214 | - | - |
| ENSP00000377372 | GAP43    | 1.58E-05 | 0.214 | - | - |
| ENSP00000254722 | SERPINF1 | 1.54E-05 | 0.214 | - | - |
| ENSP00000392328 | ZBTB12   | 1.11E-05 | 0.214 | - | - |
| ENSP00000246891 | CSN1S1   | 7.62E-05 | 0.215 | - | - |

|                 |         |          |       |   |   |
|-----------------|---------|----------|-------|---|---|
| ENSP00000391681 | POU5F1  | 3.13E-05 | 0.215 | - | - |
| ENSP00000256935 | DOCK2   | 1.42E-05 | 0.215 | - | - |
| ENSP00000353582 | NRP2    | 1.38E-05 | 0.215 | - | - |
| ENSP00000414777 | ZBTB12  | 1.11E-05 | 0.215 | - | - |
| ENSP00000005340 | DVL2    | 3.67E-05 | 0.216 | - | - |
| ENSP00000249373 | SMO     | 2.47E-05 | 0.216 | - | - |
| ENSP00000338272 | HEY1    | 1.69E-05 | 0.216 | - | - |
| ENSP00000219599 | CRYM    | 1.56E-05 | 0.216 | - | - |
| ENSP00000339906 | PAX4    | 1.48E-05 | 0.216 | - | - |
| ENSP00000292599 | MAML1   | 1.06E-05 | 0.216 | - | - |
| ENSP00000346032 | ANXA2   | 3.00E-05 | 0.217 | - | - |
| ENSP00000219150 | CORO1A  | 2.76E-05 | 0.217 | - | - |
| ENSP00000413720 | CDKN1C  | 2.42E-05 | 0.217 | - | - |
| ENSP00000357040 | VANGL2  | 2.09E-05 | 0.217 | - | - |
| ENSP00000306099 | FGB     | 1.81E-05 | 0.217 | - | - |
| ENSP00000305924 | PPP4R4  | 1.26E-05 | 0.217 | - | - |
| ENSP00000228606 | CYP27B1 | 1.23E-05 | 0.217 | - | - |
| ENSP00000258774 | HUS1    | 1.10E-05 | 0.217 | - | - |
| ENSP00000383746 | FCAMR   | 1.01E-05 | 0.217 | - | - |
| ENSP00000402060 | PVR     | 1.31E-05 | 0.218 | - | - |
| ENSP00000254235 | ADCY7   | 3.06E-05 | 0.219 | - | - |
| ENSP00000261798 | CSNK1A1 | 2.88E-05 | 0.219 | - | - |

|                 |         |          |       |   |   |
|-----------------|---------|----------|-------|---|---|
| ENSP00000265333 | VDAC1   | 2.22E-05 | 0.219 | - | - |
| ENSP00000368755 | MUC12   | 2.22E-05 | 0.219 | - | - |
| ENSP00000338157 | ZBTB16  | 2.10E-05 | 0.22  | - | - |
| ENSP00000220509 | VPS18   | 1.59E-05 | 0.22  | - | - |
| ENSP00000259470 | CTSL2   | 1.34E-05 | 0.22  | - | - |
| ENSP00000242261 | TWIST1  | 1.32E-05 | 0.22  | - | - |
| ENSP00000262493 | GNAO1   | 2.86E-05 | 0.221 | - | - |
| ENSP00000343313 | ATG5    | 2.15E-05 | 0.221 | - | - |
| ENSP00000350425 | APOA4   | 1.30E-05 | 0.221 | - | - |
| ENSP00000299022 | LIPC    | 2.67E-05 | 0.222 | - | - |
| ENSP00000362924 | GSN     | 2.62E-05 | 0.222 | - | - |
| ENSP00000337014 | HFE2    | 1.61E-05 | 0.222 | - | - |
| ENSP00000360689 | TNKS2   | 1.18E-05 | 0.222 | - | - |
| ENSP00000201586 | SULT2B1 | 4.03E-05 | 0.223 | - | - |
| ENSP00000358617 | PHTF1   | 2.51E-05 | 0.223 | - | - |
| ENSP00000358674 | UBL4A   | 1.67E-05 | 0.223 | - | - |
| ENSP00000303252 | ZNF804A | 1.35E-05 | 0.223 | - | - |
| ENSP00000326119 | PMAIP1  | 1.25E-05 | 0.223 | - | - |
| ENSP00000401435 | VPS53   | 1.44E-05 | 0.224 | - | - |
| ENSP00000360519 | RBP4    | 1.32E-05 | 0.224 | - | - |
| ENSP00000360247 | CYP2J2  | 3.79E-05 | 0.225 | - | - |
| ENSP00000168712 | FGF4    | 2.78E-05 | 0.225 | - | - |

|                 |           |          |       |   |   |
|-----------------|-----------|----------|-------|---|---|
| ENSP00000316338 | BAIAP2    | 1.78E-05 | 0.225 | - | - |
| ENSP00000363071 | DES       | 3.91E-05 | 0.226 | - | - |
| ENSP00000310305 | P2RY2     | 2.05E-05 | 0.226 | - | - |
| ENSP00000257818 | LMO2      | 2.04E-05 | 0.226 | - | - |
| ENSP00000362717 | LHX2      | 1.90E-05 | 0.226 | - | - |
| ENSP00000358105 | APH1A     | 1.26E-05 | 0.226 | - | - |
| ENSP00000295728 | CRYBA2    | 1.15E-05 | 0.226 | - | - |
| ENSP00000321334 | LPA       | 2.21E-05 | 0.227 | - | - |
| ENSP00000167586 | KRT14     | 1.78E-05 | 0.228 | - | - |
| ENSP00000284292 | NRGN      | 1.24E-05 | 0.228 | - | - |
| ENSP00000374558 | KIAA0226L | 1.21E-05 | 0.228 | - | - |
| ENSP00000335657 | CCK       | 3.07E-05 | 0.229 | - | - |
| ENSP00000328181 | NOG       | 3.06E-05 | 0.229 | - | - |
| ENSP00000404817 | TRGC1     | 2.10E-05 | 0.229 | - | - |
| ENSP00000323967 | SMARCE1   | 2.08E-05 | 0.229 | - | - |
| ENSP00000257555 | HNF1A     | 1.73E-05 | 0.229 | - | - |
| ENSP00000222598 | DLX5      | 1.69E-05 | 0.229 | - | - |
| ENSP00000295367 | SPRR3     | 1.69E-05 | 0.229 | - | - |
| ENSP00000256495 | BHLHE40   | 1.63E-05 | 0.229 | - | - |
| ENSP00000355785 | LEFTY2    | 1.39E-05 | 0.229 | - | - |
| ENSP00000312702 | DEFB114   | 1.06E-05 | 0.229 | - | - |
| ENSP00000363489 | GDF5      | 1.64E-05 | 0.23  | - | - |

|                 |         |          |       |   |   |
|-----------------|---------|----------|-------|---|---|
| ENSP00000366395 | SYVN1   | 2.37E-05 | 0.231 | - | - |
| ENSP00000221566 | SGTA    | 1.85E-05 | 0.231 | - | - |
| ENSP00000181796 | FAM107B | 1.41E-05 | 0.231 | - | - |
| ENSP00000222792 | CHN2    | 1.14E-05 | 0.231 | - | - |
| ENSP00000309503 | YWHAZ   | 5.83E-05 | 0.232 | - | - |
| ENSP00000308928 | CYLD    | 3.44E-05 | 0.232 | - | - |
| ENSP00000267082 | ITGB7   | 2.96E-05 | 0.232 | - | - |
| ENSP00000303522 | TACR1   | 1.90E-05 | 0.232 | - | - |
| ENSP00000365280 | ID1     | 1.65E-05 | 0.232 | - | - |
| ENSP00000264345 | HERC3   | 1.14E-05 | 0.232 | - | - |
| ENSP00000333837 | MRPL12  | 2.87E-05 | 0.233 | - | - |
| ENSP00000245932 | VASP    | 2.78E-05 | 0.233 | - | - |
| ENSP00000296084 | RYK     | 1.84E-05 | 0.233 | - | - |
| ENSP00000270142 | SOD1    | 5.43E-05 | 0.234 | - | - |
| ENSP00000291525 | TFF3    | 1.30E-05 | 0.234 | - | - |
| ENSP00000320548 | DNAJC4  | 1.16E-05 | 0.234 | - | - |
| ENSP00000350359 | CREB5   | 1.04E-05 | 0.234 | - | - |
| ENSP00000228307 | PXN     | 3.68E-05 | 0.235 | - | - |
| ENSP00000005257 | RALA    | 3.46E-05 | 0.235 | - | - |
| ENSP00000315011 | EDNRA   | 3.28E-05 | 0.235 | - | - |
| ENSP00000211287 | MAPK13  | 3.39E-05 | 0.236 | - | - |
| ENSP00000332816 | PTK2B   | 2.58E-05 | 0.236 | - | - |

|                 |         |          |       |   |   |
|-----------------|---------|----------|-------|---|---|
| ENSP00000276925 | CDKN2B  | 1.77E-05 | 0.236 | - | - |
| ENSP00000282111 | TCF7L1  | 1.57E-05 | 0.236 | - | - |
| ENSP00000297316 | SOX17   | 1.53E-05 | 0.236 | - | - |
| ENSP00000252593 | BST2    | 1.47E-05 | 0.236 | - | - |
| ENSP00000328858 | PYCR1   | 1.14E-05 | 0.236 | - | - |
| ENSP00000263867 | CAPG    | 1.07E-05 | 0.236 | - | - |
| ENSP00000265165 | LEF1    | 3.14E-05 | 0.237 | - | - |
| ENSP00000300055 | PLIN1   | 2.44E-05 | 0.237 | - | - |
| ENSP00000368924 | TFAP2A  | 1.76E-05 | 0.237 | - | - |
| ENSP00000000442 | ESRRA   | 1.68E-05 | 0.237 | - | - |
| ENSP00000297689 | NFIL3   | 1.44E-05 | 0.237 | - | - |
| ENSP00000354718 | AKAP13  | 1.38E-05 | 0.237 | - | - |
| ENSP00000354458 | C8A     | 1.34E-05 | 0.237 | - | - |
| ENSP00000284984 | ADAMTS1 | 1.24E-05 | 0.237 | - | - |
| ENSP00000262367 | CREBBP  | 7.84E-05 | 0.238 | - | - |
| ENSP00000398736 | CYR61   | 1.52E-05 | 0.238 | - | - |
| ENSP00000217131 | CTSZ    | 1.10E-05 | 0.238 | - | - |
| ENSP00000374455 | SQSTM1  | 3.14E-05 | 0.239 | - | - |
| ENSP00000305422 | CEBPB   | 2.91E-05 | 0.239 | - | - |
| ENSP00000289575 | SLCO2B1 | 2.07E-05 | 0.239 | - | - |
| ENSP00000234739 | BCL9    | 1.25E-05 | 0.239 | - | - |
| ENSP00000302625 | AXIN2   | 2.66E-05 | 0.24  | - | - |

|                 |         |          |       |   |   |
|-----------------|---------|----------|-------|---|---|
| ENSP00000295685 | ARPC2   | 2.15E-05 | 0.24  | - | - |
| ENSP00000263640 | ACVR1   | 1.90E-05 | 0.24  | - | - |
| ENSP00000364902 | POFUT1  | 1.60E-05 | 0.24  | - | - |
| ENSP00000354774 | SPRYD7  | 1.05E-05 | 0.24  | - | - |
| ENSP00000267978 | MAN2C1  | 1.24E-05 | 0.241 | - | - |
| ENSP00000312126 | ADCY4   | 4.13E-05 | 0.242 | - | - |
| ENSP00000223366 | GCK     | 2.08E-05 | 0.242 | - | - |
| ENSP00000263552 | TBXAS1  | 1.67E-05 | 0.242 | - | - |
| ENSP00000273320 | ZKSCAN7 | 2.41E-05 | 0.243 | - | - |
| ENSP00000331871 | RHD     | 1.29E-05 | 0.243 | - | - |
| ENSP00000304169 | PITX2   | 2.01E-05 | 0.244 | - | - |
| ENSP00000359783 | IFI44   | 1.75E-05 | 0.244 | - | - |
| ENSP00000310785 | MRPS22  | 1.10E-05 | 0.244 | - | - |
| ENSP00000356975 | ADAMTS4 | 1.05E-05 | 0.244 | - | - |
| ENSP00000252809 | GDF15   | 1.42E-05 | 0.245 | - | - |
| ENSP00000307080 | EGLN2   | 1.36E-05 | 0.245 | - | - |
| ENSP00000378394 | PSAP    | 1.49E-05 | 0.246 | - | - |
| ENSP00000371554 | SOD3    | 1.31E-05 | 0.246 | - | - |
| ENSP00000252519 | ACE2    | 1.24E-05 | 0.246 | - | - |
| ENSP00000296849 | NKD2    | 1.17E-05 | 0.246 | - | - |
| ENSP00000303211 | ACHE    | 2.00E-05 | 0.247 | - | - |
| ENSP00000295619 | PROK2   | 1.72E-05 | 0.247 | - | - |

|                 |          |          |       |   |   |
|-----------------|----------|----------|-------|---|---|
| ENSP00000352252 | HIST1H3J | 1.30E-05 | 0.247 | - | - |
| ENSP00000327650 | VPS33B   | 1.05E-05 | 0.247 | - | - |
| ENSP00000344193 | RNASE1   | 3.68E-05 | 0.248 | - | - |
| ENSP00000228938 | MGP      | 4.08E-05 | 0.249 | - | - |
| ENSP00000329127 | PRKCH    | 1.78E-05 | 0.249 | - | - |
| ENSP00000408012 | CCHCR1   | 1.45E-05 | 0.249 | - | - |
| ENSP00000294702 | GFI1     | 1.29E-05 | 0.249 | - | - |
| ENSP00000261817 | PSMD9    | 1.23E-05 | 0.249 | - | - |
| ENSP00000311579 | TNKS     | 1.10E-05 | 0.249 | - | - |
| ENSP00000355759 | PARP1    | 5.40E-05 | 0.25  | - | - |
| ENSP00000265986 | IDE      | 3.88E-05 | 0.25  | - | - |
| ENSP00000318916 | MARCO    | 1.57E-05 | 0.25  | - | - |
| ENSP00000263277 | EHD2     | 1.13E-05 | 0.25  | - | - |
| ENSP00000274813 | MUT      | 2.97E-05 | 0.251 | - | - |
| ENSP00000304207 | MUC4     | 2.54E-05 | 0.251 | - | - |
| ENSP00000231121 | HAND1    | 1.04E-05 | 0.251 | - | - |
| ENSP00000257192 | DSG1     | 1.55E-05 | 0.252 | - | - |
| ENSP00000309474 | PSMD1    | 2.25E-05 | 0.253 | - | - |
| ENSP00000252891 | NUMBL    | 1.18E-05 | 0.253 | - | - |
| ENSP00000374856 | IGLC2    | 1.11E-05 | 0.253 | - | - |
| ENSP00000246062 | MKKS     | 2.10E-05 | 0.254 | - | - |
| ENSP00000243077 | LRP1     | 1.20E-05 | 0.254 | - | - |



|                 |         |          |       |   |   |
|-----------------|---------|----------|-------|---|---|
| ENSP00000271331 | PROK1   | 1.09E-05 | 0.254 | - | - |
| ENSP00000366267 | GPC5    | 2.60E-05 | 0.255 | - | - |
| ENSP00000206765 | TGM1    | 1.86E-05 | 0.255 | - | - |
| ENSP00000216037 | XBP1    | 1.83E-05 | 0.255 | - | - |
| ENSP00000178640 | MAP2K5  | 1.26E-05 | 0.255 | - | - |
| ENSP00000240328 | TBX2    | 1.13E-05 | 0.255 | - | - |
| ENSP00000380280 | FGFR1   | 3.55E-05 | 0.256 | - | - |
| ENSP00000281708 | FBXW7   | 2.83E-05 | 0.256 | - | - |
| ENSP00000268164 | ST8SIA2 | 1.04E-05 | 0.256 | - | - |
| ENSP00000200676 | CETP    | 1.15E-05 | 0.257 | - | - |
| ENSP00000410294 | FGFR2   | 3.55E-05 | 0.258 | - | - |
| ENSP00000359563 | CDR1    | 2.61E-05 | 0.258 | - | - |
| ENSP00000259938 | CLPS    | 1.29E-05 | 0.258 | - | - |
| ENSP00000270517 | ECSIT   | 1.17E-05 | 0.258 | - | - |
| ENSP00000386212 | PSMB11  | 1.12E-05 | 0.258 | - | - |
| ENSP00000345681 | GATA2   | 2.93E-05 | 0.259 | - | - |
| ENSP00000396774 | MUC20   | 2.22E-05 | 0.259 | - | - |
| ENSP00000324834 | MUC3A   | 2.17E-05 | 0.259 | - | - |
| ENSP00000312029 | UCP2    | 1.54E-05 | 0.259 | - | - |
| ENSP00000357905 | DMBT1   | 1.22E-05 | 0.259 | - | - |
| ENSP00000245206 | GOT2    | 4.29E-05 | 0.26  | - | - |
| ENSP00000347495 | WARS    | 3.20E-05 | 0.261 | - | - |

|                 |                |          |       |   |   |
|-----------------|----------------|----------|-------|---|---|
| ENSP00000339845 | DROSHA         | 2.16E-05 | 0.261 | - | - |
| ENSP00000410071 | TUBB           | 1.96E-05 | 0.261 | - | - |
| ENSP00000310771 | GRB7           | 1.49E-05 | 0.261 | - | - |
| ENSP00000351789 | PELI1          | 1.15E-05 | 0.261 | - | - |
| ENSP00000344166 | TMEM189-UBE2V1 | 1.14E-05 | 0.261 | - | - |
| ENSP00000337697 | DCX            | 2.30E-05 | 0.262 | - | - |
| ENSP00000341625 | CYB5A          | 1.67E-05 | 0.262 | - | - |
| ENSP00000317619 | LACC1          | 1.23E-05 | 0.262 | - | - |
| ENSP00000372126 | DEFA1          | 1.06E-05 | 0.262 | - | - |
| ENSP00000321810 | TRIT1          | 1.76E-05 | 0.263 | - | - |
| ENSP00000352425 | WASF1          | 1.20E-05 | 0.264 | - | - |
| ENSP00000237014 | TTR            | 3.12E-05 | 0.265 | - | - |
| ENSP00000252505 | ALLC           | 1.63E-05 | 0.265 | - | - |
| ENSP00000335074 | GHRL           | 1.50E-05 | 0.265 | - | - |
| ENSP00000294413 | RHCE           | 1.22E-05 | 0.265 | - | - |
| ENSP00000415151 | CBFB           | 1.05E-05 | 0.265 | - | - |
| ENSP00000364094 | ITGB1          | 4.05E-05 | 0.266 | - | - |
| ENSP00000325120 | PGR            | 3.52E-05 | 0.266 | - | - |
| ENSP00000375018 | IGHV3-23       | 2.83E-05 | 0.266 | - | - |
| ENSP00000335311 | EDNRB          | 2.31E-05 | 0.266 | - | - |
| ENSP00000225893 | HNF1B          | 2.08E-05 | 0.266 | - | - |
| ENSP00000289779 | F11R           | 1.75E-05 | 0.266 | - | - |

|                 |          |          |       |   |   |
|-----------------|----------|----------|-------|---|---|
| ENSP00000266991 | DHH      | 1.30E-05 | 0.266 | - | - |
| ENSP00000210313 | PSMD5    | 1.20E-05 | 0.266 | - | - |
| ENSP00000355124 | KRT19    | 1.52E-05 | 0.267 | - | - |
| ENSP00000338461 | CYB5R3   | 1.09E-05 | 0.267 | - | - |
| ENSP00000262995 | GAB1     | 1.03E-05 | 0.267 | - | - |
| ENSP00000263253 | EP300    | 7.13E-05 | 0.268 | - | - |
| ENSP00000310244 | RASGRP1  | 1.66E-05 | 0.268 | - | - |
| ENSP00000318089 | LPP      | 1.28E-05 | 0.268 | - | - |
| ENSP00000411096 | ABCA13   | 1.23E-05 | 0.268 | - | - |
| ENSP00000011619 | RANBP9   | 1.17E-05 | 0.268 | - | - |
| ENSP00000007969 | LRRC23   | 1.47E-05 | 0.269 | - | - |
| ENSP00000332454 | RIPK4    | 1.40E-05 | 0.269 | - | - |
| ENSP00000353581 | HIST1H3E | 1.29E-05 | 0.269 | - | - |
| ENSP00000344413 | PSG5     | 1.02E-05 | 0.269 | - | - |
| ENSP00000419361 | ADCY5    | 3.12E-05 | 0.27  | - | - |
| ENSP00000335384 | ZBP2     | 1.02E-05 | 0.271 | - | - |
| ENSP00000269886 | SH3GL1   | 4.52E-05 | 0.272 | - | - |
| ENSP00000204961 | EFNB1    | 2.40E-05 | 0.272 | - | - |
| ENSP00000356992 | ARHGAP30 | 1.70E-05 | 0.272 | - | - |
| ENSP00000358698 | WNT2B    | 1.45E-05 | 0.272 | - | - |
| ENSP00000369217 | ARIH1    | 1.14E-05 | 0.272 | - | - |
| ENSP00000358511 | CNR1     | 2.38E-05 | 0.273 | - | - |

|                 |          |          |       |   |   |
|-----------------|----------|----------|-------|---|---|
| ENSP00000252490 | APOC4    | 1.32E-05 | 0.273 | - | - |
| ENSP00000311405 | ADCY6    | 3.18E-05 | 0.274 | - | - |
| ENSP00000328777 | EFNA5    | 1.32E-05 | 0.274 | - | - |
| ENSP00000307006 | IRX2     | 1.03E-05 | 0.274 | - | - |
| ENSP00000228476 | DAO      | 1.39E-05 | 0.275 | - | - |
| ENSP00000366999 | HIST1H3D | 1.19E-05 | 0.275 | - | - |
| ENSP00000323264 | MARVELD2 | 1.11E-05 | 0.275 | - | - |
| ENSP00000293373 | NCKAP1L  | 1.90E-05 | 0.276 | - | - |
| ENSP00000356070 | MAPKAPK2 | 1.38E-05 | 0.276 | - | - |
| ENSP00000376776 | DBH      | 1.06E-05 | 0.276 | - | - |
| ENSP00000360372 | CYP2C19  | 3.96E-05 | 0.277 | - | - |
| ENSP00000286355 | ADCY8    | 3.11E-05 | 0.277 | - | - |
| ENSP00000324270 | OXTR     | 2.54E-05 | 0.277 | - | - |
| ENSP00000259632 | DCTN3    | 2.02E-05 | 0.277 | - | - |
| ENSP00000373347 | SRGAP3   | 1.55E-05 | 0.277 | - | - |
| ENSP00000299847 | CHRFAM7A | 1.26E-05 | 0.277 | - | - |
| ENSP00000311095 | CYP4A11  | 1.66E-05 | 0.278 | - | - |
| ENSP00000380444 | MYO9B    | 1.44E-05 | 0.278 | - | - |
| ENSP00000349076 | ATN1     | 4.10E-05 | 0.279 | - | - |
| ENSP00000354586 | GLI2     | 2.56E-05 | 0.279 | - | - |
| ENSP00000415769 | ITIH3    | 2.31E-05 | 0.279 | - | - |
| ENSP00000261304 | GALC     | 1.38E-05 | 0.279 | - | - |

|                 |          |          |       |   |   |
|-----------------|----------|----------|-------|---|---|
| ENSP00000283249 | ITGB6    | 1.68E-05 | 0.28  | - | - |
| ENSP00000293308 | KRT8     | 1.59E-05 | 0.28  | - | - |
| ENSP00000358160 | HIST1H3H | 1.14E-05 | 0.28  | - | - |
| ENSP00000364578 | NELFE    | 1.10E-05 | 0.28  | - | - |
| ENSP00000334490 | ZDHHC8   | 1.48E-05 | 0.281 | - | - |
| ENSP00000268383 | CDR2     | 2.35E-05 | 0.283 | - | - |
| ENSP00000354398 | CYTH1    | 1.18E-05 | 0.283 | - | - |
| ENSP00000219091 | ZNF205   | 1.06E-05 | 0.283 | - | - |
| ENSP00000337915 | CYP3A4   | 4.91E-05 | 0.284 | - | - |
| ENSP00000000412 | M6PR     | 1.72E-05 | 0.284 | - | - |
| ENSP00000307305 | DDIT4    | 1.35E-05 | 0.284 | - | - |
| ENSP00000340671 | DDIT3    | 1.99E-05 | 0.285 | - | - |
| ENSP00000300035 | KIAA0101 | 2.53E-05 | 0.286 | - | - |
| ENSP00000312235 | MUC13    | 2.22E-05 | 0.286 | - | - |
| ENSP00000258052 | SMPD2    | 1.28E-05 | 0.286 | - | - |
| ENSP00000372136 | DEFA1B   | 1.08E-05 | 0.286 | - | - |
| ENSP00000313070 | PPIP5K2  | 1.74E-05 | 0.287 | - | - |
| ENSP00000418823 | FTO      | 1.43E-05 | 0.287 | - | - |
| ENSP00000247306 | CTAG2    | 1.31E-05 | 0.287 | - | - |
| ENSP00000289952 | SLC39A14 | 1.03E-05 | 0.287 | - | - |
| ENSP00000361423 | ABL1     | 5.13E-05 | 0.288 | - | - |
| ENSP00000255465 | CCNA1    | 2.96E-05 | 0.288 | - | - |

|                 |          |          |       |   |   |
|-----------------|----------|----------|-------|---|---|
| ENSP00000264381 | BCHE     | 1.66E-05 | 0.288 | - | - |
| ENSP00000383690 | MASP2    | 1.43E-05 | 0.288 | - | - |
| ENSP00000296946 | T        | 1.41E-05 | 0.288 | - | - |
| ENSP00000268057 | BBS4     | 1.36E-05 | 0.288 | - | - |
| ENSP00000306991 | HAS2     | 1.05E-05 | 0.288 | - | - |
| ENSP00000244007 | PLCG1    | 4.21E-05 | 0.289 | - | - |
| ENSP00000276079 | NONO     | 2.34E-05 | 0.289 | - | - |
| ENSP00000361562 | CTSA     | 1.81E-05 | 0.289 | - | - |
| ENSP00000352852 | MDK      | 1.68E-05 | 0.289 | - | - |
| ENSP00000311489 | SPTBN2   | 1.62E-05 | 0.289 | - | - |
| ENSP00000384192 | RASGRP3  | 1.24E-05 | 0.289 | - | - |
| ENSP00000358866 | FLNA     | 3.10E-05 | 0.29  | - | - |
| ENSP00000216727 | PABPN1   | 2.04E-05 | 0.29  | - | - |
| ENSP00000380019 | ZNF384   | 1.70E-05 | 0.29  | - | - |
| ENSP00000324633 | DEFB103B | 1.29E-05 | 0.29  | - | - |
| ENSP00000337816 | MMP25    | 1.03E-05 | 0.29  | - | - |
| ENSP00000387699 | CREB1    | 5.66E-05 | 0.291 | - | - |
| ENSP00000340820 | MAPT     | 3.32E-05 | 0.291 | - | - |
| ENSP00000390018 | C6orf10  | 1.51E-05 | 0.291 | - | - |
| ENSP00000369055 | B4GALT1  | 1.36E-05 | 0.291 | - | - |
| ENSP00000224337 | BLNK     | 1.09E-05 | 0.291 | - | - |
| ENSP00000331514 | ACTG1    | 5.56E-05 | 0.292 | - | - |

|                 |          |          |       |   |   |
|-----------------|----------|----------|-------|---|---|
| ENSP00000265715 | SLC26A4  | 1.81E-05 | 0.292 | - | - |
| ENSP00000253801 | G6PC     | 1.22E-05 | 0.292 | - | - |
| ENSP00000380523 | CAPSL    | 1.04E-05 | 0.292 | - | - |
| ENSP00000415183 | MUC2     | 2.85E-05 | 0.293 | - | - |
| ENSP00000293549 | WNT1     | 2.41E-05 | 0.293 | - | - |
| ENSP00000315383 | ASPRV1   | 1.16E-05 | 0.293 | - | - |
| ENSP00000312436 | NFE2     | 1.07E-05 | 0.293 | - | - |
| ENSP00000304283 | RAC3     | 6.18E-05 | 0.294 | - | - |
| ENSP00000352721 | DNM2     | 3.34E-05 | 0.294 | - | - |
| ENSP00000338345 | SNCA     | 2.84E-05 | 0.294 | - | - |
| ENSP00000253934 | TMEM204  | 2.29E-05 | 0.294 | - | - |
| ENSP00000385721 | GGT2     | 1.70E-05 | 0.294 | - | - |
| ENSP00000252456 | CNN1     | 1.05E-05 | 0.294 | - | - |
| ENSP00000259365 | TMOD1    | 1.00E-05 | 0.294 | - | - |
| ENSP00000358335 | MAP3K7   | 2.95E-05 | 0.295 | - | - |
| ENSP00000269299 | ASGR1    | 2.02E-05 | 0.295 | - | - |
| ENSP00000394863 | PPT1     | 1.52E-05 | 0.295 | - | - |
| ENSP00000329374 | SERPINA7 | 1.46E-05 | 0.295 | - | - |
| ENSP00000257934 | ESPL1    | 2.37E-05 | 0.296 | - | - |
| ENSP00000354486 | GOLGA4   | 1.82E-05 | 0.296 | - | - |
| ENSP00000331608 | IRX3     | 1.25E-05 | 0.296 | - | - |
| ENSP00000356094 | AVPR1B   | 1.01E-05 | 0.296 | - | - |

|                 |          |          |       |   |   |
|-----------------|----------|----------|-------|---|---|
| ENSP00000387662 | GCG      | 5.94E-05 | 0.297 | - | - |
| ENSP00000301141 | CYP2A6   | 3.87E-05 | 0.297 | - | - |
| ENSP00000302111 | MGMT     | 2.07E-05 | 0.297 | - | - |
| ENSP00000264568 | BMPR1B   | 2.03E-05 | 0.297 | - | - |
| ENSP00000360916 | VAV2     | 2.58E-05 | 0.298 | - | - |
| ENSP00000397297 | NTF3     | 1.47E-05 | 0.298 | - | - |
| ENSP00000252244 | KRT1     | 1.39E-05 | 0.298 | - | - |
| ENSP00000225174 | PPIF     | 1.09E-05 | 0.298 | - | - |
| ENSP00000364270 | XPA      | 2.06E-05 | 0.299 | - | - |
| ENSP00000278968 | TAGLN    | 1.84E-05 | 0.299 | - | - |
| ENSP00000215727 | SERPIND1 | 1.82E-05 | 0.299 | - | - |
| ENSP00000318982 | EPSTI1   | 1.46E-05 | 0.299 | - | - |
| ENSP00000355361 | CD47     | 1.38E-05 | 0.299 | - | - |
| ENSP00000290039 | CACHD1   | 1.21E-05 | 0.299 | - | - |
| ENSP00000369843 | EPHX2    | 2.20E-05 | 0.3   | - | - |
| ENSP00000231749 | ZMYND10  | 1.62E-05 | 0.3   | - | - |
| ENSP00000305824 | KCNS3    | 1.28E-05 | 0.3   | - | - |
| ENSP00000295408 | MERTK    | 1.19E-05 | 0.3   | - | - |
| ENSP00000228510 | MVK      | 1.17E-05 | 0.3   | - | - |
| ENSP00000369647 | AVP      | 2.15E-05 | 0.301 | - | - |
| ENSP00000342087 | FHIT     | 1.87E-05 | 0.301 | - | - |
| ENSP00000401397 | DDR1     | 1.13E-05 | 0.301 | - | - |



|                 |         |          |       |   |   |
|-----------------|---------|----------|-------|---|---|
| ENSP00000251849 | RAF1    | 2.51E-05 | 0.303 | - | - |
| ENSP00000233242 | APOB    | 4.29E-05 | 0.305 | - | - |
| ENSP00000339467 | RHOG    | 2.60E-05 | 0.305 | - | - |
| ENSP00000386896 | ITGA6   | 1.92E-05 | 0.305 | - | - |
| ENSP00000350199 | AP1B1   | 1.43E-05 | 0.305 | - | - |
| ENSP00000331358 | GAST    | 2.45E-05 | 0.306 | - | - |
| ENSP00000347169 | NUMB    | 2.37E-05 | 0.306 | - | - |
| ENSP00000303424 | PTGDR   | 1.49E-05 | 0.306 | - | - |
| ENSP00000329357 | SP1     | 4.58E-05 | 0.307 | - | - |
| ENSP00000315757 | LCP1    | 2.12E-05 | 0.307 | - | - |
| ENSP00000282928 | ZIC1    | 1.24E-05 | 0.307 | - | - |
| ENSP00000296777 | CARTPT  | 1.22E-05 | 0.307 | - | - |
| ENSP00000328928 | HOXB4   | 1.12E-05 | 0.307 | - | - |
| ENSP00000333769 | BSG     | 2.02E-05 | 0.308 | - | - |
| ENSP00000327758 | NKX2-5  | 1.83E-05 | 0.308 | - | - |
| ENSP00000352257 | XRCC6   | 2.91E-05 | 0.309 | - | - |
| ENSP00000356436 | PLA2G4A | 2.30E-05 | 0.309 | - | - |
| ENSP00000357130 | SPTA1   | 2.25E-05 | 0.309 | - | - |
| ENSP00000249396 | SIRT2   | 2.11E-05 | 0.309 | - | - |
| ENSP00000215794 | USP18   | 1.45E-05 | 0.309 | - | - |
| ENSP00000360502 | PDE6C   | 1.38E-05 | 0.309 | - | - |
| ENSP00000327704 | PSMF1   | 1.24E-05 | 0.309 | - | - |

|                 |        |          |       |   |   |
|-----------------|--------|----------|-------|---|---|
| ENSP00000377197 | HYDIN  | 1.22E-05 | 0.309 | - | - |
| ENSP00000392147 | PPP6C  | 2.10E-05 | 0.31  | - | - |
| ENSP00000325527 | FBN1   | 2.63E-05 | 0.311 | - | - |
| ENSP00000239243 | MSX2   | 1.95E-05 | 0.311 | - | - |
| ENSP00000357484 | GOPC   | 1.48E-05 | 0.311 | - | - |
| ENSP00000345512 | SEMA6A | 1.04E-05 | 0.311 | - | - |
| ENSP00000272164 | WNT9A  | 1.00E-05 | 0.311 | - | - |
| ENSP00000294258 | ZFPL1  | 1.05E-05 | 0.312 | - | - |
| ENSP00000348784 | IGBP1  | 2.34E-05 | 0.313 | - | - |
| ENSP00000349085 | MAGEA1 | 2.15E-05 | 0.313 | - | - |
| ENSP00000285930 | AKR1B1 | 1.92E-05 | 0.313 | - | - |
| ENSP00000255192 | BHMT2  | 1.59E-05 | 0.313 | - | - |
| ENSP00000355069 | PAX2   | 3.86E-05 | 0.315 | - | - |
| ENSP00000316772 | HMHA1  | 2.00E-05 | 0.315 | - | - |
| ENSP00000349577 | PRODH  | 1.97E-05 | 0.315 | - | - |
| ENSP00000365682 | TLE1   | 1.70E-05 | 0.315 | - | - |
| ENSP00000357879 | PSMD4  | 3.03E-05 | 0.316 | - | - |
| ENSP00000303634 | LRP8   | 1.50E-05 | 0.316 | - | - |
| ENSP00000221419 | HNRNPL | 1.42E-05 | 0.316 | - | - |
| ENSP00000222982 | CYP3A5 | 3.93E-05 | 0.317 | - | - |
| ENSP00000346300 | CRKL   | 2.66E-05 | 0.317 | - | - |
| ENSP00000322460 | SCN4B  | 1.15E-05 | 0.317 | - | - |

|                 |          |          |       |   |   |
|-----------------|----------|----------|-------|---|---|
| ENSP00000221486 | RNASEH2A | 4.53E-05 | 0.318 | - | - |
| ENSP00000229277 | ENO2     | 4.22E-05 | 0.318 | - | - |
| ENSP00000274376 | RASA1    | 2.70E-05 | 0.318 | - | - |
| ENSP00000363868 | ABCA1    | 2.69E-05 | 0.318 | - | - |
| ENSP00000302716 | MUC17    | 2.24E-05 | 0.318 | - | - |
| ENSP00000340691 | EIF4EBP1 | 1.94E-05 | 0.318 | - | - |
| ENSP00000346155 | UCKL1    | 1.41E-05 | 0.318 | - | - |
| ENSP00000354621 | SMURF1   | 2.16E-05 | 0.319 | - | - |
| ENSP00000279386 | TBX6     | 1.18E-05 | 0.319 | - | - |
| ENSP00000419923 | KLF6     | 1.17E-05 | 0.319 | - | - |
| ENSP00000328789 | AP1S2    | 1.11E-05 | 0.319 | - | - |
| ENSP00000290015 | WNT9B    | 1.08E-05 | 0.32  | - | - |
| ENSP00000322270 | LPHN2    | 1.01E-05 | 0.32  | - | - |
| ENSP00000356357 | LHX9     | 1.68E-05 | 0.321 | - | - |
| ENSP00000354478 | DLX1     | 1.32E-05 | 0.321 | - | - |
| ENSP00000314441 | METTL1   | 1.96E-05 | 0.322 | - | - |
| ENSP00000366306 | SPRY2    | 1.74E-05 | 0.322 | - | - |
| ENSP00000244137 | PEPD     | 1.51E-05 | 0.322 | - | - |
| ENSP00000332293 | ASCL2    | 1.21E-05 | 0.322 | - | - |
| ENSP00000349467 | CALM1    | 1.08E-04 | 0.323 | - | - |
| ENSP00000341838 | TNNI3    | 2.13E-05 | 0.323 | - | - |
| ENSP00000368966 | TRPC3    | 1.35E-05 | 0.323 | - | - |

|                 |          |          |       |   |   |
|-----------------|----------|----------|-------|---|---|
| ENSP00000296271 | RHO      | 4.60E-05 | 0.324 | - | - |
| ENSP00000267803 | DUOXA1   | 1.66E-05 | 0.324 | - | - |
| ENSP00000290552 | IRX6     | 1.02E-05 | 0.324 | - | - |
| ENSP00000367959 | HTR2A    | 1.82E-05 | 0.325 | - | - |
| ENSP00000359290 | DR1      | 1.66E-05 | 0.325 | - | - |
| ENSP00000321835 | ETV4     | 1.31E-05 | 0.325 | - | - |
| ENSP00000369292 | SAMD9    | 1.13E-05 | 0.325 | - | - |
| ENSP00000227471 | UNC93B1  | 1.13E-05 | 0.325 | - | - |
| ENSP00000249647 | SNAP23   | 1.96E-05 | 0.326 | - | - |
| ENSP00000260950 | MSTN     | 1.60E-05 | 0.326 | - | - |
| ENSP00000235329 | MFN2     | 1.43E-05 | 0.326 | - | - |
| ENSP00000263735 | EPCAM    | 1.18E-05 | 0.326 | - | - |
| ENSP00000354532 | PNP      | 1.11E-05 | 0.326 | - | - |
| ENSP00000314151 | KLK3     | 2.75E-05 | 0.327 | - | - |
| ENSP00000245323 | EFNB2    | 2.00E-05 | 0.327 | - | - |
| ENSP00000312673 | GH1      | 1.79E-05 | 0.327 | - | - |
| ENSP00000265164 | CASP6    | 1.09E-05 | 0.327 | - | - |
| ENSP00000355231 | BECN1    | 2.20E-05 | 0.328 | - | - |
| ENSP00000244661 | HIST1H3B | 1.35E-05 | 0.328 | - | - |
| ENSP00000297323 | ADCY1    | 3.10E-05 | 0.329 | - | - |
| ENSP00000361512 | PRPS1    | 1.24E-05 | 0.329 | - | - |
| ENSP00000263574 | APLP2    | 1.05E-05 | 0.329 | - | - |

|                 |           |          |       |   |   |
|-----------------|-----------|----------|-------|---|---|
| ENSP00000251038 | ZC3H14    | 4.42E-05 | 0.33  | - | - |
| ENSP00000282441 | YAP1      | 1.71E-05 | 0.33  | - | - |
| ENSP00000282957 | CPB1      | 1.25E-05 | 0.33  | - | - |
| ENSP00000222382 | CYP3A43   | 3.76E-05 | 0.331 | - | - |
| ENSP00000171887 | TNS1      | 2.10E-05 | 0.331 | - | - |
| ENSP00000320768 | RCAN1     | 1.14E-05 | 0.331 | - | - |
| ENSP00000268171 | FURIN     | 4.01E-05 | 0.332 | - | - |
| ENSP00000240423 | NCAPH     | 1.94E-05 | 0.332 | - | - |
| ENSP00000345708 | KCNJ11    | 1.90E-05 | 0.332 | - | - |
| ENSP00000300060 | ANPEP     | 1.46E-05 | 0.332 | - | - |
| ENSP00000365651 | NPPB      | 1.13E-05 | 0.332 | - | - |
| ENSP00000362314 | EIF4EBP2  | 1.02E-05 | 0.332 | - | - |
| ENSP00000352119 | HIST1H2AG | 1.01E-05 | 0.333 | - | - |
| ENSP00000388996 | AP1M1     | 1.67E-05 | 0.334 | - | - |
| ENSP00000349486 | SCRIB     | 1.51E-05 | 0.335 | - | - |
| ENSP00000268957 | TOB1      | 1.33E-05 | 0.335 | - | - |
| ENSP00000292035 | MED27     | 1.09E-05 | 0.335 | - | - |
| ENSP00000371471 | RSAD2     | 1.74E-05 | 0.336 | - | - |
| ENSP00000376322 | HOXD13    | 1.23E-05 | 0.336 | - | - |
| ENSP00000330218 | SOX1      | 1.09E-05 | 0.336 | - | - |
| ENSP00000261712 | PSMD11    | 1.62E-05 | 0.337 | - | - |
| ENSP00000360761 | AGPAT2    | 1.33E-05 | 0.337 | - | - |

|                 |         |          |       |   |   |
|-----------------|---------|----------|-------|---|---|
| ENSP00000339007 | GRB2    | 9.24E-05 | 0.338 | - | - |
| ENSP00000354522 | TOP1    | 3.28E-05 | 0.338 | - | - |
| ENSP00000171111 | KEAP1   | 1.50E-05 | 0.338 | - | - |
| ENSP00000382342 | ABCC1   | 1.49E-05 | 0.338 | - | - |
| ENSP00000331602 | PRKCD   | 2.78E-05 | 0.339 | - | - |
| ENSP00000303727 | CHRNA7  | 1.12E-05 | 0.339 | - | - |
| ENSP00000355536 | MTR     | 2.24E-05 | 0.34  | - | - |
| ENSP00000394085 | JMJD6   | 1.11E-05 | 0.34  | - | - |
| ENSP00000357206 | NES     | 3.34E-05 | 0.341 | - | - |
| ENSP00000380308 | DYNC1I2 | 2.66E-05 | 0.341 | - | - |
| ENSP00000374205 | TBR1    | 1.29E-05 | 0.341 | - | - |
| ENSP00000369442 | KL      | 1.29E-05 | 0.342 | - | - |
| ENSP00000302728 | GUSB    | 1.22E-05 | 0.342 | - | - |
| ENSP00000216194 | ADSL    | 2.97E-05 | 0.343 | - | - |
| ENSP00000288135 | KIT     | 2.16E-05 | 0.343 | - | - |
| ENSP00000317566 | LCORL   | 1.55E-05 | 0.344 | - | - |
| ENSP00000301790 | HRASLS5 | 1.58E-05 | 0.345 | - | - |
| ENSP00000384554 | CLDN5   | 2.26E-05 | 0.346 | - | - |
| ENSP00000222308 | FKBP8   | 1.11E-05 | 0.346 | - | - |
| ENSP00000338348 | UBE2G2  | 1.66E-05 | 0.347 | - | - |
| ENSP00000342626 | EYA1    | 1.56E-05 | 0.347 | - | - |
| ENSP00000307491 | WDR48   | 1.17E-05 | 0.347 | - | - |

|                 |         |          |       |   |   |
|-----------------|---------|----------|-------|---|---|
| ENSP00000381066 | MAP2K7  | 1.39E-05 | 0.348 | - | - |
| ENSP00000350720 | SMARCA4 | 4.31E-05 | 0.349 | - | - |
| ENSP00000361554 | TIE1    | 2.01E-05 | 0.349 | - | - |
| ENSP00000342557 | IL4I1   | 1.33E-05 | 0.349 | - | - |
| ENSP00000306330 | YWHAG   | 4.17E-05 | 0.35  | - | - |
| ENSP00000349437 | IGF2R   | 2.04E-05 | 0.35  | - | - |
| ENSP00000382697 | ROCK1   | 1.51E-05 | 0.35  | - | - |
| ENSP00000254066 | RARA    | 3.26E-05 | 0.351 | - | - |
| ENSP00000372170 | MSX1    | 2.27E-05 | 0.351 | - | - |
| ENSP00000314508 | GBA     | 1.61E-05 | 0.351 | - | - |
| ENSP00000248673 | ZFP36   | 1.59E-05 | 0.351 | - | - |
| ENSP00000265372 | CREM    | 2.04E-05 | 0.352 | - | - |
| ENSP00000264039 | GPC1    | 1.33E-05 | 0.352 | - | - |
| ENSP00000251047 | LMAN1   | 1.30E-05 | 0.352 | - | - |
| ENSP00000302021 | MUC7    | 1.29E-05 | 0.352 | - | - |
| ENSP00000241337 | GSTM2   | 1.04E-05 | 0.352 | - | - |
| ENSP00000310998 | NAGPA   | 2.30E-05 | 0.353 | - | - |
| ENSP00000380252 | NFE2L2  | 1.85E-05 | 0.353 | - | - |
| ENSP00000338864 | RASGRP2 | 1.26E-05 | 0.353 | - | - |
| ENSP00000264010 | CTCF    | 2.31E-05 | 0.354 | - | - |
| ENSP00000412292 | DEPDC1  | 1.71E-05 | 0.354 | - | - |
| ENSP00000317580 | NEUROG1 | 1.59E-05 | 0.354 | - | - |

|                 |         |          |       |   |   |
|-----------------|---------|----------|-------|---|---|
| ENSP00000339527 | FOXO3   | 1.16E-05 | 0.354 | - | - |
| ENSP00000349393 | LIG4    | 1.80E-05 | 0.355 | - | - |
| ENSP00000280346 | DLAT    | 1.79E-05 | 0.355 | - | - |
| ENSP00000352561 | CALCR   | 1.68E-05 | 0.355 | - | - |
| ENSP00000350911 | CTSE    | 1.64E-05 | 0.355 | - | - |
| ENSP00000337838 | RTN4    | 1.64E-05 | 0.355 | - | - |
| ENSP00000309591 | PRKACA  | 3.58E-05 | 0.356 | - | - |
| ENSP00000359854 | GPC3    | 2.14E-05 | 0.356 | - | - |
| ENSP00000355167 | HORMAD1 | 1.58E-05 | 0.356 | - | - |
| ENSP00000296161 | DTX3L   | 1.16E-05 | 0.356 | - | - |
| ENSP00000232003 | HRG     | 1.25E-05 | 0.357 | - | - |
| ENSP00000264059 | EFHD1   | 1.18E-05 | 0.357 | - | - |
| ENSP00000356832 | SGK1    | 1.91E-05 | 0.359 | - | - |
| ENSP00000307432 | SUCLG2  | 1.58E-05 | 0.359 | - | - |
| ENSP00000391998 | ARTN    | 1.46E-05 | 0.36  | - | - |
| ENSP00000301732 | ABCA3   | 1.36E-05 | 0.36  | - | - |
| ENSP00000385722 | INTS1   | 1.14E-05 | 0.361 | - | - |
| ENSP00000333266 | UBA7    | 1.01E-05 | 0.361 | - | - |
| ENSP00000229264 | GNB3    | 1.67E-05 | 0.362 | - | - |
| ENSP00000285238 | ABCC3   | 1.33E-05 | 0.362 | - | - |
| ENSP00000333994 | HBB     | 1.89E-05 | 0.363 | - | - |
| ENSP00000228644 | MYF5    | 1.75E-05 | 0.363 | - | - |



|                 |        |          |       |   |   |
|-----------------|--------|----------|-------|---|---|
| ENSP00000362508 | UGT1A4 | 1.10E-05 | 0.363 | - | - |
| ENSP00000262018 | SGCA   | 1.04E-05 | 0.363 | - | - |
| ENSP00000281923 | MGAT5  | 2.06E-05 | 0.364 | - | - |
| ENSP00000269141 | CDH2   | 3.14E-05 | 0.365 | - | - |
| ENSP00000261170 | GUCY2C | 2.26E-05 | 0.365 | - | - |
| ENSP00000235382 | RGS2   | 1.74E-05 | 0.365 | - | - |
| ENSP00000264741 | ITGA9  | 1.58E-05 | 0.365 | - | - |
| ENSP00000248935 | GSTT1  | 1.18E-05 | 0.365 | - | - |
| ENSP00000230053 | B3GAT2 | 1.01E-05 | 0.365 | - | - |
| ENSP00000355153 | CDKN2A | 4.96E-05 | 0.366 | - | - |
| ENSP00000365811 | SPAG6  | 2.37E-05 | 0.366 | - | - |
| ENSP00000262133 | RBL2   | 1.37E-05 | 0.366 | - | - |
| ENSP00000369810 | VPS16  | 1.14E-05 | 0.366 | - | - |
| ENSP00000300935 | RAB8A  | 2.36E-05 | 0.367 | - | - |
| ENSP00000292807 | AP2M1  | 2.78E-05 | 0.368 | - | - |
| ENSP00000357669 | NPR1   | 2.27E-05 | 0.368 | - | - |
| ENSP00000250244 | AP1M2  | 1.29E-05 | 0.368 | - | - |
| ENSP00000257904 | CDK4   | 5.04E-05 | 0.369 | - | - |
| ENSP00000369816 | SHBG   | 2.00E-05 | 0.369 | - | - |
| ENSP00000355747 | PSEN2  | 1.73E-05 | 0.369 | - | - |
| ENSP00000261523 | RORA   | 1.47E-05 | 0.369 | - | - |
| ENSP00000343325 | PKN1   | 2.72E-05 | 0.37  | - | - |

|                 |        |          |       |   |   |
|-----------------|--------|----------|-------|---|---|
| ENSP00000286621 | ADK    | 1.30E-05 | 0.37  | - | - |
| ENSP00000280362 | PTS    | 1.96E-05 | 0.371 | - | - |
| ENSP00000249499 | HOXD9  | 1.32E-05 | 0.371 | - | - |
| ENSP00000344609 | BTG3   | 1.15E-05 | 0.371 | - | - |
| ENSP00000418532 | UGT1A3 | 1.06E-05 | 0.371 | - | - |
| ENSP00000362549 | UGT1A8 | 1.04E-05 | 0.371 | - | - |
| ENSP00000313681 | SPHK1  | 1.52E-05 | 0.372 | - | - |
| ENSP00000290953 | AGRP   | 1.13E-05 | 0.372 | - | - |
| ENSP00000301585 | ICT1   | 3.20E-05 | 0.373 | - | - |
| ENSP00000396439 | RING1  | 1.56E-05 | 0.373 | - | - |
| ENSP00000384211 | PSME4  | 1.32E-05 | 0.373 | - | - |
| ENSP00000320493 | TRIP10 | 1.31E-05 | 0.373 | - | - |
| ENSP00000358043 | ECM1   | 1.28E-05 | 0.373 | - | - |
| ENSP00000413234 | AP2A2  | 1.12E-05 | 0.373 | - | - |
| ENSP00000284384 | PRKCA  | 4.24E-05 | 0.374 | - | - |
| ENSP00000284523 | WNT3A  | 2.86E-05 | 0.374 | - | - |
| ENSP00000360290 | PRKAA2 | 1.32E-05 | 0.374 | - | - |
| ENSP00000366460 | PLXDC2 | 1.10E-05 | 0.374 | - | - |
| ENSP00000363763 | EPHB2  | 1.78E-05 | 0.375 | - | - |
| ENSP00000361669 | ESX1   | 1.55E-05 | 0.375 | - | - |
| ENSP00000338235 | MTDH   | 1.22E-05 | 0.375 | - | - |
| ENSP00000339191 | CAV1   | 3.25E-05 | 0.376 | - | - |

|                 |          |          |       |   |   |
|-----------------|----------|----------|-------|---|---|
| ENSP00000417257 | FNDC3A   | 2.94E-05 | 0.376 | - | - |
| ENSP00000302830 | MAEA     | 1.94E-05 | 0.376 | - | - |
| ENSP00000241124 | GJB6     | 1.39E-05 | 0.376 | - | - |
| ENSP00000263038 | PHYH     | 1.09E-05 | 0.376 | - | - |
| ENSP00000347088 | LARGE    | 1.46E-05 | 0.378 | - | - |
| ENSP00000377148 | AP1G1    | 1.46E-05 | 0.378 | - | - |
| ENSP00000394794 | PTPN13   | 1.14E-05 | 0.378 | - | - |
| ENSP00000223140 | NOBOX    | 1.03E-05 | 0.379 | - | - |
| ENSP00000377941 | ACTN1    | 2.29E-05 | 0.381 | - | - |
| ENSP00000335153 | HSP90AA1 | 4.30E-05 | 0.382 | - | - |
| ENSP00000257860 | PRPH     | 1.25E-05 | 0.382 | - | - |
| ENSP00000309572 | TERT     | 2.58E-05 | 0.383 | - | - |
| ENSP00000357838 | OAT      | 1.85E-05 | 0.383 | - | - |
| ENSP00000361824 | SPTAN1   | 2.01E-05 | 0.384 | - | - |
| ENSP00000300177 | GREM1    | 1.35E-05 | 0.384 | - | - |
| ENSP00000368552 | SIRT5    | 1.31E-05 | 0.384 | - | - |
| ENSP00000352408 | BABAM1   | 1.46E-05 | 0.385 | - | - |
| ENSP00000417281 | MDM2     | 4.48E-05 | 0.386 | - | - |
| ENSP00000262850 | RRAGB    | 1.51E-05 | 0.386 | - | - |
| ENSP00000217402 | CHMP4B   | 1.32E-05 | 0.386 | - | - |
| ENSP00000326366 | PSEN1    | 2.58E-05 | 0.387 | - | - |
| ENSP00000249750 | ALDH1A2  | 1.49E-05 | 0.387 | - | - |

|                 |          |          |       |   |   |
|-----------------|----------|----------|-------|---|---|
| ENSP00000263182 | BBOX1    | 3.15E-05 | 0.39  | - | - |
| ENSP00000369654 | HBD      | 1.48E-05 | 0.39  | - | - |
| ENSP00000359285 | CHRNA4   | 1.27E-05 | 0.39  | - | - |
| ENSP00000349959 | RICTOR   | 2.21E-05 | 0.392 | - | - |
| ENSP00000368169 | DVL1     | 2.98E-05 | 0.393 | - | - |
| ENSP00000252699 | ACTN4    | 2.53E-05 | 0.394 | - | - |
| ENSP00000322898 | EBF1     | 1.79E-05 | 0.394 | - | - |
| ENSP00000332247 | ATP6V0A2 | 1.25E-05 | 0.394 | - | - |
| ENSP00000258106 | EMX1     | 1.15E-05 | 0.394 | - | - |
| ENSP00000343838 | UGT1A10  | 1.04E-05 | 0.394 | - | - |
| ENSP00000353013 | CLEC14A  | 1.02E-05 | 0.394 | - | - |
| ENSP00000262958 | GNA15    | 2.23E-05 | 0.396 | - | - |
| ENSP00000294312 | FGF19    | 2.02E-05 | 0.396 | - | - |
| ENSP00000239462 | TNN      | 1.61E-05 | 0.396 | - | - |
| ENSP00000355173 | ATG9A    | 1.06E-05 | 0.396 | - | - |
| ENSP00000237612 | ABCG2    | 2.36E-05 | 0.397 | - | - |
| ENSP00000257566 | TBX3     | 1.24E-05 | 0.397 | - | - |
| ENSP00000254657 | PER2     | 1.12E-05 | 0.397 | - | - |
| ENSP00000234701 | CLCA1    | 1.08E-05 | 0.397 | - | - |
| ENSP00000365807 | GNA14    | 1.31E-05 | 0.398 | - | - |
| ENSP00000362525 | UGT1A7   | 1.06E-05 | 0.398 | - | - |
| ENSP00000222248 | SLC5A5   | 2.37E-05 | 0.399 | - | - |

|                 |          |          |       |   |   |
|-----------------|----------|----------|-------|---|---|
| ENSP00000281821 | EPHA4    | 1.45E-05 | 0.399 | - | - |
| ENSP00000373487 | KRT18    | 1.09E-05 | 0.399 | - | - |
| ENSP00000341382 | SMC4     | 2.35E-05 | 0.4   | - | - |
| ENSP00000314499 | GAK      | 1.39E-05 | 0.4   | - | - |
| ENSP00000342007 | CYP1A2   | 2.16E-05 | 0.401 | - | - |
| ENSP00000277865 | GLUD1    | 1.65E-05 | 0.401 | - | - |
| ENSP00000306129 | DRD5     | 1.62E-05 | 0.401 | - | - |
| ENSP00000344460 | CBS      | 2.12E-05 | 0.402 | - | - |
| ENSP00000261303 | PSMC1    | 1.76E-05 | 0.402 | - | - |
| ENSP00000345096 | IMPDH1   | 1.38E-05 | 0.402 | - | - |
| ENSP00000408411 | LAMP2    | 2.21E-05 | 0.404 | - | - |
| ENSP00000380178 | UBE2G1   | 1.65E-05 | 0.404 | - | - |
| ENSP00000234296 | ORC2     | 1.45E-05 | 0.404 | - | - |
| ENSP00000356999 | USF1     | 1.38E-05 | 0.404 | - | - |
| ENSP00000356000 | PLXNA2   | 1.02E-05 | 0.404 | - | - |
| ENSP00000286548 | GNAQ     | 2.01E-05 | 0.405 | - | - |
| ENSP00000008527 | CRY1     | 1.09E-05 | 0.406 | - | - |
| ENSP00000338082 | HBG2     | 1.04E-05 | 0.406 | - | - |
| ENSP00000296641 | F2RL2    | 1.29E-05 | 0.407 | - | - |
| ENSP00000362513 | UGT1A5   | 1.08E-05 | 0.407 | - | - |
| ENSP00000295902 | PRICKLE2 | 1.07E-05 | 0.407 | - | - |
| ENSP00000219313 | PSMD7    | 1.68E-05 | 0.408 | - | - |

|                 |        |          |       |   |   |
|-----------------|--------|----------|-------|---|---|
| ENSP00000302967 | HDAC3  | 4.89E-05 | 0.409 | - | - |
| ENSP00000346768 | UGT1A9 | 1.07E-05 | 0.409 | - | - |
| ENSP00000316176 | UBE2N  | 2.84E-05 | 0.41  | - | - |
| ENSP00000247182 | SIX1   | 1.07E-05 | 0.411 | - | - |
| ENSP00000301774 | BEST1  | 1.04E-05 | 0.411 | - | - |
| ENSP00000372654 | AQP4   | 1.09E-05 | 0.412 | - | - |
| ENSP00000222271 | COMP   | 3.16E-05 | 0.413 | - | - |
| ENSP00000355195 | ASB12  | 1.23E-05 | 0.413 | - | - |
| ENSP00000348461 | RAC1   | 7.45E-05 | 0.414 | - | - |
| ENSP00000386165 | CEBPD  | 2.03E-05 | 0.414 | - | - |
| ENSP00000350616 | DDC    | 1.32E-05 | 0.414 | - | - |
| ENSP00000326371 | FOXC2  | 1.30E-05 | 0.415 | - | - |
| ENSP00000346437 | ATG7   | 1.20E-05 | 0.415 | - | - |
| ENSP00000265012 | GCNT2  | 1.08E-05 | 0.415 | - | - |
| ENSP00000340510 | PPL    | 1.04E-05 | 0.415 | - | - |
| ENSP00000390948 | CYFIP2 | 1.01E-05 | 0.415 | - | - |
| ENSP00000363019 | UBE2D1 | 1.84E-05 | 0.416 | - | - |
| ENSP00000261733 | ALDH2  | 1.47E-05 | 0.416 | - | - |
| ENSP00000362768 | RBL1   | 1.07E-05 | 0.416 | - | - |
| ENSP00000262320 | AXIN1  | 2.91E-05 | 0.417 | - | - |
| ENSP00000349595 | ATP2A1 | 1.61E-05 | 0.417 | - | - |
| ENSP00000264717 | GCKR   | 1.17E-05 | 0.417 | - | - |

|                 |          |          |       |   |   |
|-----------------|----------|----------|-------|---|---|
| ENSP00000352401 | RPE      | 1.35E-05 | 0.418 | - | - |
| ENSP00000297347 | MED30    | 1.01E-05 | 0.418 | - | - |
| ENSP00000265709 | ANK1     | 4.00E-05 | 0.419 | - | - |
| ENSP00000265723 | ABCB4    | 1.22E-05 | 0.419 | - | - |
| ENSP00000323516 | UTS2R    | 1.56E-05 | 0.42  | - | - |
| ENSP00000261740 | TRPV4    | 1.15E-05 | 0.42  | - | - |
| ENSP00000279227 | FERMT3   | 1.10E-05 | 0.42  | - | - |
| ENSP00000363851 | EDA2R    | 1.78E-05 | 0.421 | - | - |
| ENSP00000350894 | SERPINH1 | 1.15E-05 | 0.421 | - | - |
| ENSP00000389140 | DCC      | 1.16E-05 | 0.422 | - | - |
| ENSP00000217386 | OXT      | 1.05E-05 | 0.422 | - | - |
| ENSP00000262187 | RHEB     | 1.17E-05 | 0.424 | - | - |
| ENSP00000370023 | HADHA    | 1.02E-05 | 0.424 | - | - |
| ENSP00000297261 | SHH      | 5.91E-05 | 0.426 | - | - |
| ENSP00000278616 | ATM      | 4.64E-05 | 0.426 | - | - |
| ENSP00000375730 | RPL13A   | 1.63E-05 | 0.426 | - | - |
| ENSP00000325863 | MRE11A   | 2.61E-05 | 0.427 | - | - |
| ENSP00000265362 | SEMA3A   | 1.24E-05 | 0.429 | - | - |
| ENSP00000352839 | NPSR1    | 2.11E-05 | 0.43  | - | - |
| ENSP00000260970 | PPIG     | 1.73E-05 | 0.43  | - | - |
| ENSP00000283928 | JAZF1    | 1.23E-05 | 0.43  | - | - |
| ENSP00000349465 | PICK1    | 1.23E-05 | 0.43  | - | - |

|                 |         |          |       |   |   |
|-----------------|---------|----------|-------|---|---|
| ENSP00000370330 | ERBB2IP | 1.12E-05 | 0.43  | - | - |
| ENSP00000263904 | STAM2   | 1.02E-05 | 0.43  | - | - |
| ENSP00000265729 | SRI     | 1.34E-05 | 0.431 | - | - |
| ENSP00000324560 | ULK1    | 1.13E-05 | 0.431 | - | - |
| ENSP00000331201 | HGS     | 2.42E-05 | 0.432 | - | - |
| ENSP00000323588 | SOX2    | 2.13E-05 | 0.432 | - | - |
| ENSP00000221476 | CKM     | 1.48E-05 | 0.432 | - | - |
| ENSP00000349887 | ASNA1   | 1.45E-05 | 0.432 | - | - |
| ENSP00000240139 | PPP3CC  | 1.14E-05 | 0.432 | - | - |
| ENSP00000395473 | MAN2B1  | 1.10E-05 | 0.432 | - | - |
| ENSP00000287295 | AIFM1   | 2.50E-05 | 0.433 | - | - |
| ENSP00000054668 | UTS2    | 1.94E-05 | 0.433 | - | - |
| ENSP00000343819 | OTX2    | 1.75E-05 | 0.433 | - | - |
| ENSP00000263816 | LRP2    | 1.00E-05 | 0.433 | - | - |
| ENSP00000363680 | EDA     | 3.34E-05 | 0.434 | - | - |
| ENSP00000157812 | PSMC4   | 2.02E-05 | 0.434 | - | - |
| ENSP00000304845 | UGT1A1  | 1.27E-05 | 0.434 | - | - |
| ENSP00000354238 | ENPP1   | 1.07E-05 | 0.434 | - | - |
| ENSP00000257879 | ITGA7   | 1.46E-05 | 0.435 | - | - |
| ENSP00000226760 | WFS1    | 1.09E-05 | 0.437 | - | - |
| ENSP00000371138 | FKBP1A  | 1.76E-05 | 0.438 | - | - |
| ENSP00000173898 | TRO     | 1.87E-05 | 0.44  | - | - |



|                 |       |          |       |   |   |
|-----------------|-------|----------|-------|---|---|
| ENSP00000347942 | RET   | 3.55E-05 | 0.441 | - | - |
| ENSP00000352336 | PLCG2 | 1.95E-05 | 0.441 | - | - |
| ENSP00000301740 | SRRM2 | 1.51E-05 | 0.441 | - | - |
| ENSP00000336666 | AP1S1 | 1.14E-05 | 0.441 | - | - |
| ENSP00000339801 | IDS   | 2.66E-05 | 0.442 | - | - |
| ENSP00000348307 | SIRPA | 2.17E-05 | 0.442 | - | - |
| ENSP00000316779 | BIN1  | 1.18E-05 | 0.442 | - | - |
| ENSP00000346389 | MEF2A | 1.15E-05 | 0.442 | - | - |
| ENSP00000311121 | PSMA8 | 1.07E-05 | 0.442 | - | - |
| ENSP00000262340 | RPE65 | 1.04E-05 | 0.442 | - | - |
| ENSP00000330349 | DDX41 | 1.02E-05 | 0.442 | - | - |
| ENSP00000331791 | TBX1  | 1.37E-05 | 0.443 | - | - |
| ENSP00000344479 | NR4A2 | 1.34E-05 | 0.443 | - | - |
| ENSP00000374998 | IGHD  | 1.51E-05 | 0.444 | - | - |
| ENSP00000252660 | MAS1  | 2.24E-05 | 0.445 | - | - |
| ENSP00000361418 | IPO13 | 1.59E-05 | 0.445 | - | - |
| ENSP00000368020 | KIF3A | 1.55E-05 | 0.445 | - | - |
| ENSP00000340684 | MAOA  | 1.12E-05 | 0.445 | - | - |
| ENSP00000287936 | HMGCR | 1.82E-05 | 0.446 | - | - |
| ENSP00000349705 | TOP3B | 1.20E-05 | 0.446 | - | - |
| ENSP00000332353 | PTCH1 | 2.55E-05 | 0.447 | - | - |
| ENSP00000295113 | FRZB  | 2.43E-05 | 0.447 | - | - |

|                 |          |          |       |   |   |
|-----------------|----------|----------|-------|---|---|
| ENSP00000348069 | SREBF1   | 1.80E-05 | 0.447 | - | - |
| ENSP00000307859 | SLC22A18 | 1.22E-05 | 0.447 | - | - |
| ENSP00000229307 | NANOG    | 3.30E-05 | 0.449 | - | - |
| ENSP00000298510 | PRDX3    | 1.41E-05 | 0.449 | - | - |
| ENSP00000262238 | YY1      | 2.84E-05 | 0.45  | - | - |
| ENSP00000248114 | GFER     | 2.37E-05 | 0.45  | - | - |
| ENSP00000260682 | CYP2C9   | 1.61E-05 | 0.45  | - | - |
| ENSP00000203786 | ARHGAP4  | 1.16E-05 | 0.45  | - | - |
| ENSP00000338629 | RERE     | 1.73E-05 | 0.451 | - | - |
| ENSP00000325526 | WNT11    | 1.20E-05 | 0.451 | - | - |
| ENSP00000233336 | TTL      | 1.01E-05 | 0.451 | - | - |
| ENSP00000262948 | MAP2K2   | 1.46E-05 | 0.452 | - | - |
| ENSP00000283179 | HNRNPU   | 1.40E-05 | 0.452 | - | - |
| ENSP00000243457 | KCNJ2    | 1.04E-05 | 0.452 | - | - |
| ENSP00000292644 | PSMC2    | 3.24E-05 | 0.453 | - | - |
| ENSP00000281043 | MYCN     | 1.49E-05 | 0.453 | - | - |
| ENSP00000322323 | FAM20C   | 1.03E-05 | 0.453 | - | - |
| ENSP00000316054 | DVL3     | 1.87E-05 | 0.454 | - | - |
| ENSP00000268613 | CDH13    | 1.13E-05 | 0.455 | - | - |
| ENSP00000310006 | NR1D2    | 1.02E-05 | 0.455 | - | - |
| ENSP00000269260 | ARRB2    | 9.09E-05 | 0.456 | - | - |
| ENSP00000315859 | RNPS1    | 2.01E-05 | 0.456 | - | - |

|                 |         |          |       |   |   |
|-----------------|---------|----------|-------|---|---|
| ENSP00000363641 | TXN     | 3.38E-05 | 0.457 | - | - |
| ENSP00000257915 | TFCP2   | 1.01E-05 | 0.457 | - | - |
| ENSP00000401632 | GSTT1   | 1.27E-05 | 0.458 | - | - |
| ENSP00000332565 | SULT4A1 | 1.94E-05 | 0.459 | - | - |
| ENSP00000311449 | RAB6A   | 1.43E-05 | 0.459 | - | - |
| ENSP00000262735 | PPARA   | 3.41E-05 | 0.46  | - | - |
| ENSP00000383623 | MLLT4   | 1.58E-05 | 0.46  | - | - |
| ENSP00000181383 | CPB2    | 1.40E-05 | 0.46  | - | - |
| ENSP00000311005 | MAPK7   | 1.13E-05 | 0.46  | - | - |
| ENSP00000352673 | ELF3    | 2.53E-05 | 0.461 | - | - |
| ENSP00000247970 | PIN1    | 2.44E-05 | 0.461 | - | - |
| ENSP00000295797 | PRKCI   | 1.26E-05 | 0.461 | - | - |
| ENSP00000354877 | ULK2    | 1.05E-05 | 0.461 | - | - |
| ENSP00000365891 | WAS     | 2.39E-05 | 0.464 | - | - |
| ENSP00000278568 | PAK1    | 2.27E-05 | 0.464 | - | - |
| ENSP00000352324 | ATXN3   | 1.44E-05 | 0.465 | - | - |
| ENSP00000381282 | VIMP    | 1.13E-05 | 0.465 | - | - |
| ENSP00000366746 | STAM    | 1.04E-05 | 0.466 | - | - |
| ENSP00000372191 | SIRT3   | 1.01E-05 | 0.466 | - | - |
| ENSP00000312987 | HNF4A   | 3.05E-05 | 0.467 | - | - |
| ENSP00000346294 | S100A4  | 1.43E-05 | 0.467 | - | - |
| ENSP00000264187 | NID1    | 1.18E-05 | 0.467 | - | - |

|                 |        |          |       |   |   |
|-----------------|--------|----------|-------|---|---|
| ENSP00000297375 | EN2    | 1.69E-05 | 0.468 | - | - |
| ENSP00000260947 | BARD1  | 1.37E-05 | 0.468 | - | - |
| ENSP00000347041 | FMOD   | 1.98E-05 | 0.469 | - | - |
| ENSP00000367309 | MAOB   | 1.05E-05 | 0.469 | - | - |
| ENSP00000317145 | GDNF   | 2.10E-05 | 0.471 | - | - |
| ENSP00000324856 | STK11  | 1.67E-05 | 0.471 | - | - |
| ENSP00000269216 | GATA6  | 1.69E-05 | 0.472 | - | - |
| ENSP00000264639 | PSMD3  | 1.67E-05 | 0.472 | - | - |
| ENSP00000257248 | GIF    | 1.34E-05 | 0.472 | - | - |
| ENSP00000317578 | ADRBK2 | 5.37E-05 | 0.473 | - | - |
| ENSP00000054666 | VAMP3  | 1.75E-05 | 0.473 | - | - |
| ENSP00000382064 | DTNA   | 1.00E-05 | 0.473 | - | - |
| ENSP00000307863 | U2AF2  | 2.16E-05 | 0.474 | - | - |
| ENSP00000364979 | COL4A1 | 1.44E-05 | 0.474 | - | - |
| ENSP00000368174 | MCM8   | 5.07E-05 | 0.475 | - | - |
| ENSP00000362298 | SGPL1  | 1.17E-05 | 0.475 | - | - |
| ENSP00000281537 | TJP1   | 3.12E-05 | 0.476 | - | - |
| ENSP00000317714 | STX4   | 1.20E-05 | 0.476 | - | - |
| ENSP00000293422 | MYL6   | 1.09E-05 | 0.476 | - | - |
| ENSP00000340879 | RAD1   | 1.09E-05 | 0.476 | - | - |
| ENSP00000348827 | THRB   | 1.32E-05 | 0.478 | - | - |
| ENSP00000271308 | PSMA5  | 1.98E-05 | 0.479 | - | - |

|                 |        |          |       |   |   |
|-----------------|--------|----------|-------|---|---|
| ENSP00000296930 | NPM1   | 3.34E-05 | 0.48  | - | - |
| ENSP00000345530 | NEDD4  | 1.98E-05 | 0.48  | - | - |
| ENSP00000256104 | FABP4  | 1.45E-05 | 0.481 | - | - |
| ENSP00000400365 | LAMA2  | 1.22E-05 | 0.481 | - | - |
| ENSP00000319501 | UGDH   | 1.13E-05 | 0.481 | - | - |
| ENSP00000265022 | DGKG   | 1.08E-05 | 0.482 | - | - |
| ENSP00000306124 | PRKCE  | 2.01E-05 | 0.483 | - | - |
| ENSP00000298110 | GPR101 | 1.18E-05 | 0.483 | - | - |
| ENSP00000282549 | OTX1   | 1.09E-05 | 0.483 | - | - |
| ENSP00000309457 | VPS41  | 1.09E-05 | 0.483 | - | - |
| ENSP00000334115 | OR10T2 | 1.05E-05 | 0.483 | - | - |
| ENSP00000305424 | OR1F1  | 1.06E-05 | 0.484 | - | - |
| ENSP00000003084 | CFTR   | 3.81E-05 | 0.485 | - | - |
| ENSP00000369050 | CYP1A1 | 2.08E-05 | 0.485 | - | - |
| ENSP00000298032 | ARMC3  | 1.13E-05 | 0.486 | - | - |
| ENSP00000354511 | COMT   | 2.19E-05 | 0.487 | - | - |
| ENSP00000347717 | DHCR7  | 1.19E-05 | 0.487 | - | - |
| ENSP00000260653 | SIX3   | 1.09E-05 | 0.487 | - | - |
| ENSP00000342307 | FOXM1  | 2.28E-05 | 0.488 | - | - |
| ENSP00000302100 | LGALS4 | 1.98E-05 | 0.488 | - | - |
| ENSP00000332118 | EPHB3  | 1.22E-05 | 0.488 | - | - |
| ENSP00000374467 | ABCC8  | 1.80E-05 | 0.489 | - | - |

|                 |         |          |       |   |   |
|-----------------|---------|----------|-------|---|---|
| ENSP00000361151 | CEL     | 1.11E-05 | 0.489 | - | - |
| ENSP00000261900 | CCNT1   | 1.01E-05 | 0.489 | - | - |
| ENSP00000358022 | MCL1    | 3.28E-05 | 0.49  | - | - |
| ENSP00000351486 | NTRK1   | 1.06E-05 | 0.49  | - | - |
| ENSP00000265094 | FBXW11  | 1.20E-05 | 0.491 | - | - |
| ENSP00000298552 | TSC1    | 1.06E-05 | 0.491 | - | - |
| ENSP00000328547 | DNMT3B  | 4.19E-05 | 0.492 | - | - |
| ENSP00000368798 | MBTPS2  | 1.67E-05 | 0.492 | - | - |
| ENSP00000344666 | NF2     | 1.89E-05 | 0.493 | - | - |
| ENSP00000217800 | POLI    | 1.50E-05 | 0.493 | - | - |
| ENSP00000396127 | RAN     | 5.57E-05 | 0.494 | - | - |
| ENSP00000249071 | RAC2    | 4.48E-05 | 0.494 | - | - |
| ENSP00000263043 | ICK     | 2.89E-05 | 0.494 | - | - |
| ENSP00000381504 | PRPS2   | 1.13E-05 | 0.494 | - | - |
| ENSP00000272065 | ACP1    | 1.17E-05 | 0.495 | - | - |
| ENSP00000320935 | SLC2A4  | 1.29E-05 | 0.496 | - | - |
| ENSP00000338413 | UBA1    | 1.26E-05 | 0.496 | - | - |
| ENSP00000200181 | ITGB4   | 1.16E-05 | 0.496 | - | - |
| ENSP00000295550 | COL6A3  | 1.03E-05 | 0.496 | - | - |
| ENSP00000279242 | MRPL49  | 2.38E-05 | 0.497 | - | - |
| ENSP00000248975 | YWHAH   | 1.80E-05 | 0.497 | - | - |
| ENSP00000369677 | EMILIN1 | 1.71E-05 | 0.497 | - | - |

|                  |           |          |       |   |   |
|------------------|-----------|----------|-------|---|---|
| ENSP00000043402  | RTN4R     | 1.44E-05 | 0.497 | - | - |
| ENSP000000321636 | TOP3A     | 1.61E-05 | 0.498 | - | - |
| ENSP000000314414 | AP2B1     | 1.33E-05 | 0.498 | - | - |
| ENSP000000310928 | PPARD     | 1.23E-05 | 0.498 | - | - |
| ENSP000000321744 | HIST1H2BC | 1.27E-05 | 0.499 | - | - |
| ENSP000000260795 | FGFR3     | 1.66E-05 | 0.5   | - | - |
| ENSP000000262854 | HUWE1     | 1.69E-05 | 0.501 | - | - |
| ENSP000000311165 | AQP1      | 1.38E-05 | 0.501 | - | - |
| ENSP000000319096 | RAP2B     | 1.12E-05 | 0.501 | - | - |
| ENSP000000299421 | ILK       | 1.73E-05 | 0.502 | - | - |
| ENSP000000336790 | ATF4      | 2.04E-05 | 0.507 | - | - |
| ENSP000000230658 | ISL1      | 1.94E-05 | 0.507 | - | - |
| ENSP000000270349 | SLC6A3    | 2.38E-05 | 0.508 | - | - |
| ENSP000000301843 | CTTN      | 1.83E-05 | 0.508 | - | - |
| ENSP000000287156 | UBE2L6    | 1.34E-05 | 0.508 | - | - |
| ENSP000000366244 | ARAF      | 1.23E-05 | 0.509 | - | - |
| ENSP000000247138 | SLC35A2   | 1.46E-05 | 0.51  | - | - |
| ENSP000000263864 | VAMP8     | 1.06E-05 | 0.51  | - | - |
| ENSP000000314343 | MED29     | 1.18E-05 | 0.511 | - | - |
| ENSP000000317955 | EEA1      | 2.10E-05 | 0.512 | - | - |
| ENSP000000259457 | PSMB7     | 1.54E-05 | 0.513 | - | - |
| ENSP000000343741 | ATR       | 2.02E-05 | 0.514 | - | - |

|                 |            |          |       |   |   |
|-----------------|------------|----------|-------|---|---|
| ENSP00000243222 | COL10A1    | 1.50E-05 | 0.514 | - | - |
| ENSP00000295600 | MITF       | 1.34E-05 | 0.514 | - | - |
| ENSP00000262193 | PSMB1      | 1.90E-05 | 0.515 | - | - |
| ENSP00000345494 | PLSCR1     | 1.15E-05 | 0.516 | - | - |
| ENSP00000264710 | RAB10      | 1.38E-05 | 0.517 | - | - |
| ENSP00000265734 | CDK6       | 1.64E-05 | 0.52  | - | - |
| ENSP00000264709 | DNMT3A     | 1.22E-05 | 0.52  | - | - |
| ENSP00000240652 | IAPP       | 1.10E-05 | 0.52  | - | - |
| ENSP00000252945 | CYP2E1     | 1.64E-05 | 0.521 | - | - |
| ENSP00000295956 | FLNB       | 1.10E-05 | 0.522 | - | - |
| ENSP00000278833 | ROM1       | 2.09E-05 | 0.523 | - | - |
| ENSP00000258080 | HTRA2      | 1.33E-05 | 0.523 | - | - |
| ENSP00000396937 | PSMD13     | 1.48E-05 | 0.524 | - | - |
| ENSP00000253339 | LATS1      | 1.07E-05 | 0.525 | - | - |
| ENSP00000285379 | CA2        | 3.65E-05 | 0.527 | - | - |
| ENSP00000217958 | PSMD10     | 2.15E-05 | 0.527 | - | - |
| ENSP00000379616 | MYH11      | 1.94E-05 | 0.527 | - | - |
| ENSP00000358155 | HIST2H2AA4 | 1.62E-05 | 0.527 | - | - |
| ENSP00000355537 | ACTN2      | 2.73E-05 | 0.528 | - | - |
| ENSP00000334003 | INTU       | 2.23E-05 | 0.529 | - | - |
| ENSP00000352516 | DNMT1      | 2.79E-05 | 0.53  | - | - |
| ENSP00000341189 | PTK2       | 1.88E-05 | 0.53  | - | - |



|                 |          |          |       |   |   |
|-----------------|----------|----------|-------|---|---|
| ENSP00000310129 | PSMD2    | 1.86E-05 | 0.53  | - | - |
| ENSP00000270225 | SAE1     | 1.80E-05 | 0.53  | - | - |
| ENSP00000320940 | NCOA1    | 1.66E-05 | 0.53  | - | - |
| ENSP00000416293 | SLC2A1   | 1.48E-05 | 0.53  | - | - |
| ENSP00000242576 | UNG      | 1.43E-05 | 0.531 | - | - |
| ENSP00000266744 | ASCL1    | 1.27E-05 | 0.531 | - | - |
| ENSP00000254810 | H3F3B    | 4.93E-05 | 0.532 | - | - |
| ENSP00000362334 | PSMB2    | 1.63E-05 | 0.532 | - | - |
| ENSP00000367207 | MYC      | 7.25E-05 | 0.533 | - | - |
| ENSP00000388340 | CLINT1   | 1.64E-05 | 0.534 | - | - |
| ENSP00000351926 | AP2A1    | 1.35E-05 | 0.534 | - | - |
| ENSP00000386259 | NEB      | 1.32E-05 | 0.534 | - | - |
| ENSP00000401445 | ERN1     | 1.36E-05 | 0.535 | - | - |
| ENSP00000362401 | CYSLTR1  | 1.17E-05 | 0.535 | - | - |
| ENSP00000338606 | SMUG1    | 1.07E-05 | 0.535 | - | - |
| ENSP00000321797 | FGF8     | 1.38E-05 | 0.536 | - | - |
| ENSP00000350275 | HIST1H3A | 1.26E-05 | 0.536 | - | - |
| ENSP00000381105 | NPS      | 1.14E-05 | 0.537 | - | - |
| ENSP00000378890 | GCH1     | 1.03E-05 | 0.537 | - | - |
| ENSP00000260402 | PLCB2    | 2.03E-05 | 0.538 | - | - |
| ENSP00000368350 | TPT1     | 1.59E-05 | 0.539 | - | - |
| ENSP00000364475 | FBP1     | 1.50E-05 | 0.539 | - | - |

|                 |            |          |       |   |   |
|-----------------|------------|----------|-------|---|---|
| ENSP00000331040 | OLIG2      | 1.35E-05 | 0.54  | - | - |
| ENSP00000272227 | PDIA6      | 1.13E-05 | 0.54  | - | - |
| ENSP00000262186 | KCNH2      | 1.63E-05 | 0.541 | - | - |
| ENSP00000323439 | SMC6       | 1.08E-05 | 0.542 | - | - |
| ENSP00000393887 | AHSG       | 2.17E-05 | 0.543 | - | - |
| ENSP00000372547 | SRY        | 2.21E-05 | 0.544 | - | - |
| ENSP00000352835 | MB         | 1.14E-05 | 0.544 | - | - |
| ENSP00000226413 | GNRHR      | 1.12E-05 | 0.544 | - | - |
| ENSP00000237596 | PKD2       | 1.09E-05 | 0.544 | - | - |
| ENSP00000291295 | CALM3      | 7.91E-05 | 0.546 | - | - |
| ENSP00000335306 | DPPA4      | 1.50E-05 | 0.547 | - | - |
| ENSP00000299767 | HSP90B1    | 1.33E-05 | 0.548 | - | - |
| ENSP00000350937 | TES        | 2.51E-05 | 0.549 | - | - |
| ENSP00000348108 | KHDRBS3    | 1.30E-05 | 0.549 | - | - |
| ENSP00000375921 | PAX3       | 1.71E-05 | 0.55  | - | - |
| ENSP00000367992 | ESD        | 1.43E-05 | 0.55  | - | - |
| ENSP00000354677 | GPX7       | 1.29E-05 | 0.551 | - | - |
| ENSP00000272298 | CALM2      | 8.06E-05 | 0.552 | - | - |
| ENSP00000396219 | MEF2C      | 1.59E-05 | 0.552 | - | - |
| ENSP00000318631 | HSD17B6    | 2.99E-05 | 0.553 | - | - |
| ENSP00000358158 | HIST2H2AA3 | 1.63E-05 | 0.553 | - | - |
| ENSP00000311113 | JUP        | 2.08E-05 | 0.555 | - | - |

|                 |         |          |       |   |   |
|-----------------|---------|----------|-------|---|---|
| ENSP00000317985 | ROCK2   | 1.10E-05 | 0.555 | - | - |
| ENSP00000362690 | NR5A1   | 1.56E-05 | 0.556 | - | - |
| ENSP00000234111 | ODC1    | 1.19E-05 | 0.556 | - | - |
| ENSP00000328251 | MINA    | 1.13E-05 | 0.556 | - | - |
| ENSP00000310448 | SART1   | 1.00E-05 | 0.556 | - | - |
| ENSP00000252115 | POLDIP3 | 1.17E-05 | 0.557 | - | - |
| ENSP00000297848 | COL14A1 | 2.36E-05 | 0.558 | - | - |
| ENSP00000317659 | GUK1    | 2.07E-05 | 0.558 | - | - |
| ENSP00000266718 | LUM     | 1.89E-05 | 0.558 | - | - |
| ENSP00000336702 | EIF5A   | 1.44E-05 | 0.56  | - | - |
| ENSP00000402084 | WEE1    | 1.10E-05 | 0.56  | - | - |
| ENSP00000331817 | ALYREF  | 2.60E-05 | 0.562 | - | - |
| ENSP00000324897 | UBE2I   | 3.25E-05 | 0.564 | - | - |
| ENSP00000314067 | PAK2    | 1.49E-05 | 0.566 | - | - |
| ENSP00000250416 | PARP2   | 1.36E-05 | 0.566 | - | - |
| ENSP00000392330 | BCAP31  | 1.28E-05 | 0.566 | - | - |
| ENSP00000337103 | CHAT    | 1.27E-05 | 0.566 | - | - |
| ENSP00000352312 | DNAH8   | 7.19E-05 | 0.568 | - | - |
| ENSP00000298852 | PSMC3   | 2.78E-05 | 0.568 | - | - |
| ENSP00000349960 | ACTB    | 4.75E-05 | 0.569 | - | - |
| ENSP00000304408 | COL3A1  | 2.17E-05 | 0.569 | - | - |
| ENSP00000313420 | PRKDC   | 2.12E-05 | 0.569 | - | - |

|                 |         |          |       |   |   |
|-----------------|---------|----------|-------|---|---|
| ENSP00000344456 | CTNNB1  | 6.19E-05 | 0.57  | - | - |
| ENSP00000290541 | PSMB4   | 2.64E-05 | 0.57  | - | - |
| ENSP00000303452 | TRH     | 1.61E-05 | 0.574 | - | - |
| ENSP00000308944 | HLTF    | 1.05E-05 | 0.574 | - | - |
| ENSP00000359778 | ELTD1   | 1.90E-05 | 0.576 | - | - |
| ENSP00000204604 | CHRD    | 1.12E-05 | 0.576 | - | - |
| ENSP00000292907 | COX7A1  | 1.35E-05 | 0.577 | - | - |
| ENSP00000291901 | TNNT1   | 1.08E-05 | 0.577 | - | - |
| ENSP00000288266 | APPL1   | 4.32E-05 | 0.578 | - | - |
| ENSP00000248272 | GAN     | 1.19E-05 | 0.578 | - | - |
| ENSP00000303500 | PAH     | 1.02E-05 | 0.58  | - | - |
| ENSP00000359719 | PRKACB  | 1.18E-05 | 0.581 | - | - |
| ENSP00000366347 | NKX2-2  | 1.07E-05 | 0.581 | - | - |
| ENSP00000264335 | YWHAE   | 2.45E-05 | 0.583 | - | - |
| ENSP00000310572 | PSMC5   | 2.19E-05 | 0.585 | - | - |
| ENSP00000282486 | MBNL1   | 1.99E-05 | 0.585 | - | - |
| ENSP00000228945 | ARHGDIB | 1.02E-05 | 0.585 | - | - |
| ENSP00000259512 | DERL1   | 1.00E-05 | 0.585 | - | - |
| ENSP00000278823 | MTA2    | 1.74E-05 | 0.586 | - | - |
| ENSP00000256958 | SLCO1B1 | 1.06E-05 | 0.588 | - | - |
| ENSP00000267163 | RB1     | 3.52E-05 | 0.59  | - | - |
| ENSP00000363092 | PRKG1   | 1.29E-05 | 0.59  | - | - |

|                 |         |          |       |   |   |
|-----------------|---------|----------|-------|---|---|
| ENSP00000260433 | CYP19A1 | 1.15E-05 | 0.59  | - | - |
| ENSP00000353608 | DSC3    | 1.07E-05 | 0.59  | - | - |
| ENSP00000219476 | TSC2    | 1.60E-05 | 0.592 | - | - |
| ENSP00000250448 | FOXA1   | 1.03E-05 | 0.592 | - | - |
| ENSP00000305603 | FUT3    | 1.82E-05 | 0.595 | - | - |
| ENSP00000367623 | HSPA14  | 1.03E-05 | 0.595 | - | - |
| ENSP00000297518 | CDK5    | 2.83E-05 | 0.599 | - | - |
| ENSP00000333950 | FMN1    | 1.30E-05 | 0.599 | - | - |
| ENSP00000361141 | OPN4    | 1.01E-05 | 0.599 | - | - |
| ENSP00000338072 | AVPR2   | 3.04E-05 | 0.6   | - | - |
| ENSP00000267996 | TPM1    | 2.15E-05 | 0.6   | - | - |
| ENSP00000359478 | ABCC2   | 1.27E-05 | 0.6   | - | - |
| ENSP00000266376 | CACNA1C | 1.27E-05 | 0.6   | - | - |
| ENSP00000355560 | TBCE    | 1.49E-05 | 0.601 | - | - |
| ENSP00000331327 | WT1     | 1.47E-05 | 0.601 | - | - |
| ENSP00000255380 | CHRM3   | 1.02E-05 | 0.602 | - | - |
| ENSP00000264552 | UBE2S   | 2.06E-05 | 0.603 | - | - |
| ENSP00000332151 | DSE     | 1.50E-05 | 0.606 | - | - |
| ENSP00000359206 | BTRC    | 1.58E-05 | 0.608 | - | - |
| ENSP00000350336 | DSCR8   | 1.34E-05 | 0.608 | - | - |
| ENSP00000291552 | U2AF1   | 1.03E-05 | 0.608 | - | - |
| ENSP00000253363 | RBM39   | 1.01E-05 | 0.608 | - | - |

|                 |        |          |       |   |   |
|-----------------|--------|----------|-------|---|---|
| ENSP00000262304 | PKD1   | 1.01E-05 | 0.608 | - | - |
| ENSP00000355778 | H3F3A  | 4.88E-05 | 0.611 | - | - |
| ENSP00000254108 | FUS    | 1.71E-05 | 0.611 | - | - |
| ENSP00000379865 | ADHFE1 | 1.55E-05 | 0.611 | - | - |
| ENSP00000078429 | GNA11  | 1.36E-05 | 0.611 | - | - |
| ENSP00000384026 | HMGA2  | 1.48E-05 | 0.612 | - | - |
| ENSP00000263360 | EED    | 2.99E-05 | 0.613 | - | - |
| ENSP00000314214 | VAMP2  | 1.33E-05 | 0.613 | - | - |
| ENSP00000306606 | ADH1B  | 1.08E-05 | 0.613 | - | - |
| ENSP00000363779 | IKBKAP | 1.69E-05 | 0.615 | - | - |
| ENSP00000278715 | HMBS   | 1.39E-05 | 0.615 | - | - |
| ENSP00000295901 | PSMD6  | 1.72E-05 | 0.616 | - | - |
| ENSP00000212015 | SIRT1  | 4.17E-05 | 0.618 | - | - |
| ENSP00000320171 | PKM    | 3.19E-05 | 0.618 | - | - |
| ENSP00000366013 | GNB2L1 | 2.88E-05 | 0.618 | - | - |
| ENSP00000302051 | ECEL1  | 1.25E-05 | 0.618 | - | - |
| ENSP00000383199 | NEDD4L | 1.17E-05 | 0.619 | - | - |
| ENSP00000270586 | PSMB6  | 2.07E-05 | 0.62  | - | - |
| ENSP00000306920 | GLB1   | 1.47E-05 | 0.62  | - | - |
| ENSP00000262306 | TCEB2  | 1.26E-05 | 0.62  | - | - |
| ENSP00000359211 | DPYD   | 1.11E-05 | 0.621 | - | - |
| ENSP00000296456 | APEH   | 1.40E-05 | 0.622 | - | - |

|                 |        |          |       |   |   |
|-----------------|--------|----------|-------|---|---|
| ENSP00000225964 | COL1A1 | 2.39E-05 | 0.623 | - | - |
| ENSP00000211998 | VCL    | 2.09E-05 | 0.623 | - | - |
| ENSP00000344254 | FXYD5  | 1.33E-05 | 0.623 | - | - |
| ENSP00000360248 | ENTPD1 | 1.22E-05 | 0.623 | - | - |
| ENSP00000262056 | EIF4B  | 1.16E-05 | 0.623 | - | - |
| ENSP00000344871 | MYO1F  | 2.64E-05 | 0.624 | - | - |
| ENSP00000225426 | PSMB3  | 1.77E-05 | 0.624 | - | - |
| ENSP00000400175 | RHOA   | 1.76E-05 | 0.624 | - | - |
| ENSP00000368401 | PAX6   | 1.63E-05 | 0.624 | - | - |
| ENSP00000326804 | CUL1   | 2.56E-05 | 0.625 | - | - |
| ENSP00000242480 | EGR2   | 1.26E-05 | 0.625 | - | - |
| ENSP00000215574 | CDC34  | 1.18E-05 | 0.625 | - | - |
| ENSP00000250003 | MYOD1  | 3.64E-05 | 0.626 | - | - |
| ENSP00000245441 | NIN    | 2.00E-05 | 0.626 | - | - |
| ENSP00000256010 | NTS    | 3.72E-05 | 0.627 | - | - |
| ENSP00000396308 | DHFR   | 1.96E-05 | 0.627 | - | - |
| ENSP00000367787 | LIG3   | 1.19E-05 | 0.627 | - | - |
| ENSP00000252971 | MNX1   | 2.69E-05 | 0.628 | - | - |
| ENSP00000261427 | UBE2K  | 2.54E-05 | 0.628 | - | - |
| ENSP00000244769 | ATXN1  | 1.97E-05 | 0.628 | - | - |
| ENSP00000263270 | AP2S1  | 1.47E-05 | 0.628 | - | - |
| ENSP00000243050 | NR4A1  | 1.05E-05 | 0.628 | - | - |

|                 |         |          |       |   |   |
|-----------------|---------|----------|-------|---|---|
| ENSP00000392423 | RELN    | 1.31E-05 | 0.629 | - | - |
| ENSP00000347251 | GPS1    | 1.19E-05 | 0.629 | - | - |
| ENSP00000337261 | ARHGEF1 | 1.08E-05 | 0.629 | - | - |
| ENSP00000362888 | ADO     | 1.06E-05 | 0.629 | - | - |
| ENSP00000262843 | MID2    | 1.02E-05 | 0.63  | - | - |
| ENSP00000334458 | GATA4   | 2.30E-05 | 0.631 | - | - |
| ENSP00000405798 | CDK16   | 1.36E-05 | 0.631 | - | - |
| ENSP00000354995 | ABCG1   | 1.01E-05 | 0.632 | - | - |
| ENSP00000290399 | SIM2    | 1.02E-05 | 0.633 | - | - |
| ENSP00000350132 | PLN     | 1.06E-05 | 0.635 | - | - |
| ENSP00000238081 | YWHAQ   | 2.96E-05 | 0.636 | - | - |
| ENSP00000264731 | TP63    | 2.29E-05 | 0.636 | - | - |
| ENSP00000369335 | FBXO18  | 1.25E-05 | 0.636 | - | - |
| ENSP00000355296 | LDB3    | 1.12E-05 | 0.637 | - | - |
| ENSP00000367545 | TP73    | 1.37E-05 | 0.64  | - | - |
| ENSP00000264162 | LCT     | 1.75E-05 | 0.643 | - | - |
| ENSP00000362649 | HDAC1   | 5.71E-05 | 0.644 | - | - |
| ENSP00000369643 | GRPR    | 1.04E-05 | 0.644 | - | - |
| ENSP00000384675 | SOS1    | 1.90E-05 | 0.645 | - | - |
| ENSP00000341940 | CAV3    | 1.25E-05 | 0.645 | - | - |
| ENSP00000263754 | KAT2B   | 3.12E-05 | 0.648 | - | - |
| ENSP00000248553 | HSPB1   | 1.13E-05 | 0.648 | - | - |



|                 |        |          |       |   |   |
|-----------------|--------|----------|-------|---|---|
| ENSP00000173229 | NTN1   | 1.09E-05 | 0.649 | - | - |
| ENSP00000370083 | SMN1   | 1.08E-05 | 0.649 | - | - |
| ENSP00000355325 | PSMB5  | 2.03E-05 | 0.65  | - | - |
| ENSP00000312435 | DAG1   | 1.24E-05 | 0.651 | - | - |
| ENSP00000246554 | COX6B1 | 1.07E-05 | 0.652 | - | - |
| ENSP00000355512 | OPN3   | 1.57E-05 | 0.655 | - | - |
| ENSP00000351490 | MAX    | 1.47E-05 | 0.656 | - | - |
| ENSP00000044462 | PSMA4  | 2.72E-05 | 0.658 | - | - |
| ENSP00000368646 | PRDX4  | 1.27E-05 | 0.658 | - | - |
| ENSP00000238738 | RHOQ   | 1.24E-05 | 0.658 | - | - |
| ENSP00000343745 | DICER1 | 1.97E-05 | 0.66  | - | - |
| ENSP00000262294 | TRIM37 | 1.62E-05 | 0.661 | - | - |
| ENSP00000358857 | EMD    | 1.58E-05 | 0.661 | - | - |
| ENSP00000261707 | SLC6A4 | 2.04E-05 | 0.663 | - | - |
| ENSP00000225698 | C1QBP  | 3.96E-05 | 0.664 | - | - |
| ENSP00000262746 | PRDX1  | 1.58E-05 | 0.664 | - | - |
| ENSP00000222115 | HAS1   | 1.29E-05 | 0.665 | - | - |
| ENSP00000230671 | SLC6A7 | 2.69E-05 | 0.666 | - | - |
| ENSP00000416320 | NTM    | 1.01E-05 | 0.666 | - | - |
| ENSP00000155840 | KCNQ1  | 1.72E-05 | 0.667 | - | - |
| ENSP00000356918 | STX7   | 1.21E-05 | 0.668 | - | - |
| ENSP00000305355 | PRKCB  | 1.40E-05 | 0.669 | - | - |

|                 |           |          |       |   |   |
|-----------------|-----------|----------|-------|---|---|
| ENSP00000392466 | LDB1      | 1.12E-05 | 0.669 | - | - |
| ENSP00000378735 | DNAJC6    | 1.05E-05 | 0.669 | - | - |
| ENSP00000399968 | NCOA2     | 2.19E-05 | 0.67  | - | - |
| ENSP00000368824 | CNKS2     | 1.09E-05 | 0.67  | - | - |
| ENSP00000332194 | HIST2H2AC | 1.65E-05 | 0.672 | - | - |
| ENSP00000216254 | ACO2      | 1.41E-05 | 0.672 | - | - |
| ENSP00000358770 | SLK       | 1.40E-05 | 0.672 | - | - |
| ENSP00000266304 | TEF       | 1.31E-05 | 0.674 | - | - |
| ENSP00000367891 | LGALS7    | 1.26E-05 | 0.674 | - | - |
| ENSP00000244289 | LIPE      | 1.20E-05 | 0.674 | - | - |
| ENSP00000174621 | TRPV1     | 1.06E-05 | 0.675 | - | - |
| ENSP00000396843 | NFIC      | 1.01E-05 | 0.675 | - | - |
| ENSP00000401371 | TIA1      | 1.90E-05 | 0.677 | - | - |
| ENSP00000361047 | ALG13     | 1.20E-05 | 0.677 | - | - |
| ENSP00000417587 | PEG10     | 1.05E-05 | 0.678 | - | - |
| ENSP00000381045 | UBE3A     | 1.92E-05 | 0.679 | - | - |
| ENSP00000216181 | MYH9      | 1.30E-05 | 0.681 | - | - |
| ENSP00000266481 | DNM1L     | 1.80E-05 | 0.682 | - | - |
| ENSP00000370119 | SMN2      | 1.12E-05 | 0.682 | - | - |
| ENSP00000298139 | WRN       | 1.52E-05 | 0.684 | - | - |
| ENSP00000225402 | AATF      | 3.04E-05 | 0.685 | - | - |
| ENSP00000362481 | UPRT      | 1.39E-05 | 0.685 | - | - |

|                 |          |          |       |   |   |
|-----------------|----------|----------|-------|---|---|
| ENSP00000346879 | NKX2-1   | 1.12E-05 | 0.685 | - | - |
| ENSP00000357047 | MED23    | 1.10E-05 | 0.686 | - | - |
| ENSP00000237527 | GHRH     | 1.80E-05 | 0.69  | - | - |
| ENSP00000362413 | PGK1     | 2.83E-05 | 0.691 | - | - |
| ENSP00000261245 | MNAT1    | 1.18E-05 | 0.691 | - | - |
| ENSP00000367034 | HIST1H4C | 1.97E-05 | 0.692 | - | - |
| ENSP00000279230 | PLCB3    | 1.34E-05 | 0.692 | - | - |
| ENSP00000352929 | CSNK1E   | 1.02E-05 | 0.692 | - | - |
| ENSP00000355645 | ACTA1    | 2.32E-05 | 0.694 | - | - |
| ENSP00000268712 | NCOR1    | 1.86E-05 | 0.695 | - | - |
| ENSP00000368253 | NR0B1    | 1.20E-05 | 0.695 | - | - |
| ENSP00000217964 | TBL1X    | 1.13E-05 | 0.695 | - | - |
| ENSP00000332643 | NDN      | 1.02E-05 | 0.696 | - | - |
| ENSP00000359532 | NTSR1    | 2.28E-05 | 0.697 | - | - |
| ENSP00000347232 | BLM      | 1.12E-05 | 0.697 | - | - |
| ENSP00000238112 | CPSF3    | 2.29E-05 | 0.698 | - | - |
| ENSP00000257430 | APC      | 1.34E-05 | 0.698 | - | - |
| ENSP00000260985 | IDH1     | 1.22E-05 | 0.699 | - | - |
| ENSP00000363880 | CUL2     | 1.14E-05 | 0.705 | - | - |
| ENSP00000227667 | APOC3    | 1.49E-05 | 0.706 | - | - |
| ENSP00000263233 | SYP      | 2.37E-05 | 0.708 | - | - |
| ENSP00000362335 | SAR1A    | 1.20E-05 | 0.708 | - | - |

|                 |          |          |       |   |   |
|-----------------|----------|----------|-------|---|---|
| ENSP00000354554 | MT-CYB   | 1.33E-05 | 0.709 | - | - |
| ENSP00000297268 | COL1A2   | 1.88E-05 | 0.71  | - | - |
| ENSP00000265354 | SRF      | 2.41E-05 | 0.715 | - | - |
| ENSP00000370571 | TH       | 2.37E-05 | 0.716 | - | - |
| ENSP00000347168 | HIST1H4J | 1.71E-05 | 0.717 | - | - |
| ENSP00000358153 | HIST2H4B | 1.70E-05 | 0.718 | - | - |
| ENSP00000266970 | CDK2     | 4.17E-05 | 0.721 | - | - |
| ENSP00000343282 | HIST1H4D | 1.71E-05 | 0.721 | - | - |
| ENSP00000261479 | PSMA6    | 1.64E-05 | 0.721 | - | - |
| ENSP00000305958 | STIP1    | 1.03E-05 | 0.721 | - | - |
| ENSP00000350159 | HIST1H4K | 1.71E-05 | 0.723 | - | - |
| ENSP00000346316 | HIST1H4I | 1.71E-05 | 0.723 | - | - |
| ENSP00000382791 | GRIK1    | 2.97E-05 | 0.724 | - | - |
| ENSP00000253727 | NR1H2    | 2.58E-05 | 0.724 | - | - |
| ENSP00000351410 | PRKAR1A  | 1.48E-05 | 0.725 | - | - |
| ENSP00000216479 | AHSA1    | 1.11E-05 | 0.725 | - | - |
| ENSP00000229812 | STK38    | 1.42E-05 | 0.726 | - | - |
| ENSP00000348573 | AKAP9    | 1.05E-05 | 0.726 | - | - |
| ENSP00000327545 | NPTXR    | 1.05E-05 | 0.727 | - | - |
| ENSP00000265335 | RAD50    | 1.52E-05 | 0.729 | - | - |
| ENSP00000296412 | ADH5     | 1.10E-05 | 0.729 | - | - |
| ENSP00000353624 | HIST1H4E | 1.71E-05 | 0.731 | - | - |

|                 |          |          |       |   |   |
|-----------------|----------|----------|-------|---|---|
| ENSP00000220849 | EIF3E    | 1.27E-05 | 0.731 | - | - |
| ENSP00000369456 | ITPA     | 1.28E-05 | 0.733 | - | - |
| ENSP00000256383 | EIF2S1   | 2.08E-05 | 0.734 | - | - |
| ENSP00000358162 | HIST2H4A | 1.71E-05 | 0.738 | - | - |
| ENSP00000324173 | HSPA5    | 1.65E-05 | 0.739 | - | - |
| ENSP00000334267 | C5orf38  | 1.06E-05 | 0.741 | - | - |
| ENSP00000266427 | ETV6     | 2.22E-05 | 0.742 | - | - |
| ENSP00000324464 | CSNK1D   | 1.01E-05 | 0.742 | - | - |
| ENSP00000362824 | OGT      | 1.55E-05 | 0.743 | - | - |
| ENSP00000337761 | RAB27A   | 1.65E-05 | 0.745 | - | - |
| ENSP00000358301 | ADRB1    | 1.48E-05 | 0.746 | - | - |
| ENSP00000297185 | HSPA9    | 2.43E-05 | 0.749 | - | - |
| ENSP00000290378 | ACTC1    | 1.23E-05 | 0.749 | - | - |
| ENSP00000373298 | COLQ     | 1.89E-05 | 0.75  | - | - |
| ENSP00000292476 | CPSF4    | 1.33E-05 | 0.75  | - | - |
| ENSP00000311997 | NEFH     | 1.15E-05 | 0.75  | - | - |
| ENSP00000269321 | ARHGDIA  | 1.18E-05 | 0.751 | - | - |
| ENSP00000366581 | HIST1H4B | 1.71E-05 | 0.752 | - | - |
| ENSP00000339090 | RBMX2    | 1.05E-05 | 0.753 | - | - |
| ENSP00000349722 | UBE2D3   | 1.03E-05 | 0.753 | - | - |
| ENSP00000265070 | GOLPH3   | 1.44E-05 | 0.757 | - | - |
| ENSP00000231790 | MLH1     | 1.49E-05 | 0.758 | - | - |

|                 |          |          |       |   |   |
|-----------------|----------|----------|-------|---|---|
| ENSP00000348442 | PSMD12   | 1.74E-05 | 0.759 | - | - |
| ENSP00000340278 | PARK7    | 1.66E-05 | 0.759 | - | - |
| ENSP00000261366 | LMNB1    | 1.41E-05 | 0.76  | - | - |
| ENSP00000252338 | FAM155B  | 1.47E-05 | 0.761 | - | - |
| ENSP00000257770 | NT5E     | 2.27E-05 | 0.762 | - | - |
| ENSP00000350767 | HIST4H4  | 1.77E-05 | 0.763 | - | - |
| ENSP00000280892 | EIF4E    | 1.58E-05 | 0.763 | - | - |
| ENSP00000164139 | PYGM     | 1.80E-05 | 0.768 | - | - |
| ENSP00000368438 | PCNA     | 6.76E-05 | 0.77  | - | - |
| ENSP00000248572 | GNGT1    | 1.09E-05 | 0.771 | - | - |
| ENSP00000348634 | MYH6     | 1.17E-05 | 0.773 | - | - |
| ENSP00000325875 | HSP90AB1 | 1.15E-05 | 0.773 | - | - |
| ENSP00000314458 | CDC42    | 4.62E-05 | 0.774 | - | - |
| ENSP00000320147 | EZH2     | 1.75E-05 | 0.775 | - | - |
| ENSP00000319690 | HNRNPC   | 1.09E-05 | 0.775 | - | - |
| ENSP00000216962 | PYGB     | 1.45E-05 | 0.776 | - | - |
| ENSP00000236959 | ATIC     | 2.58E-05 | 0.778 | - | - |
| ENSP00000262809 | ELL      | 1.74E-05 | 0.778 | - | - |
| ENSP00000363559 | EIF6     | 1.59E-05 | 0.779 | - | - |
| ENSP00000256682 | ARF3     | 1.18E-05 | 0.781 | - | - |
| ENSP00000401802 | PSMC6    | 3.40E-05 | 0.782 | - | - |
| ENSP00000383558 | GCGR     | 1.28E-05 | 0.782 | - | - |

|                 |          |          |       |   |   |
|-----------------|----------|----------|-------|---|---|
| ENSP00000216392 | PYGL     | 1.46E-05 | 0.783 | - | - |
| ENSP00000359423 | MTM1     | 1.11E-05 | 0.784 | - | - |
| ENSP00000348258 | HIST1H4L | 1.75E-05 | 0.785 | - | - |
| ENSP00000215071 | PSMD8    | 1.72E-05 | 0.785 | - | - |
| ENSP00000225792 | DDX5     | 1.47E-05 | 0.786 | - | - |
| ENSP00000264926 | RAD18    | 1.13E-05 | 0.787 | - | - |
| ENSP00000215904 | PDXP     | 1.32E-05 | 0.79  | - | - |
| ENSP00000322439 | TUFM     | 1.34E-05 | 0.791 | - | - |
| ENSP00000320604 | FAXDC2   | 1.16E-05 | 0.791 | - | - |
| ENSP00000369400 | NHS      | 1.26E-05 | 0.792 | - | - |
| ENSP00000262033 | PTGES3   | 1.42E-05 | 0.794 | - | - |
| ENSP00000264265 | LXN      | 1.23E-05 | 0.794 | - | - |
| ENSP00000369497 | BRCA2    | 1.35E-05 | 0.795 | - | - |
| ENSP00000220562 | EXTL3    | 1.14E-05 | 0.795 | - | - |
| ENSP00000209875 | CBX5     | 1.22E-05 | 0.797 | - | - |
| ENSP00000244711 | MEA1     | 1.19E-05 | 0.804 | - | - |
| ENSP00000300574 | CRK      | 2.05E-05 | 0.805 | - | - |
| ENSP00000217961 | STS      | 1.88E-05 | 0.805 | - | - |
| ENSP00000348984 | SON      | 1.41E-05 | 0.807 | - | - |
| ENSP00000265773 | SMARCA2  | 1.82E-05 | 0.809 | - | - |
| ENSP00000299293 | FRS2     | 1.29E-05 | 0.81  | - | - |
| ENSP00000330343 | SUMO3    | 1.10E-05 | 0.81  | - | - |

|                 |          |          |       |   |   |
|-----------------|----------|----------|-------|---|---|
| ENSP00000359345 | RPL5     | 2.16E-05 | 0.811 | - | - |
| ENSP00000323155 | DAND5    | 1.49E-05 | 0.811 | - | - |
| ENSP00000361626 | YBX1     | 1.14E-05 | 0.811 | - | - |
| ENSP00000352980 | HIST1H4A | 1.77E-05 | 0.816 | - | - |
| ENSP00000351284 | RAD52    | 1.34E-05 | 0.817 | - | - |
| ENSP00000265814 | RUNX1T1  | 2.05E-05 | 0.819 | - | - |
| ENSP00000245552 | NT5C     | 1.20E-05 | 0.819 | - | - |
| ENSP00000339992 | MYB      | 2.06E-05 | 0.822 | - | - |
| ENSP00000304592 | FASN     | 1.29E-05 | 0.822 | - | - |
| ENSP00000350283 | BRCA1    | 3.91E-05 | 0.823 | - | - |
| ENSP00000353622 | SIN3A    | 1.72E-05 | 0.825 | - | - |
| ENSP00000215567 | TECR     | 1.39E-05 | 0.825 | - | - |
| ENSP00000356433 | UST      | 1.18E-05 | 0.826 | - | - |
| ENSP00000381717 | UBE2D2   | 1.09E-05 | 0.826 | - | - |
| ENSP00000361777 | SET      | 2.31E-05 | 0.831 | - | - |
| ENSP00000360621 | ORC1     | 1.44E-05 | 0.831 | - | - |
| ENSP00000217971 | PGRMC1   | 1.04E-05 | 0.831 | - | - |
| ENSP00000222812 | STX1A    | 1.03E-05 | 0.831 | - | - |
| ENSP00000225430 | RPL19    | 1.02E-05 | 0.835 | - | - |
| ENSP00000351665 | CLIP1    | 1.21E-05 | 0.841 | - | - |
| ENSP00000366974 | HIST1H4F | 1.74E-05 | 0.842 | - | - |
| ENSP00000217244 | CSNK2A1  | 1.75E-05 | 0.843 | - | - |



|                 |           |          |       |   |   |
|-----------------|-----------|----------|-------|---|---|
| ENSP00000269122 | CLTC      | 1.39E-05 | 0.844 | - | - |
| ENSP00000279593 | GRIN2B    | 1.39E-05 | 0.845 | - | - |
| ENSP00000419692 | RXRA      | 1.34E-05 | 0.845 | - | - |
| ENSP00000350249 | POT1      | 1.00E-05 | 0.846 | - | - |
| ENSP00000289352 | HIST1H4H  | 1.75E-05 | 0.849 | - | - |
| ENSP00000342374 | SNRPD2    | 1.59E-05 | 0.849 | - | - |
| ENSP00000376076 | SUMO1     | 2.90E-05 | 0.85  | - | - |
| ENSP00000351015 | NF1       | 1.20E-05 | 0.85  | - | - |
| ENSP00000298316 | ARF6      | 1.02E-05 | 0.851 | - | - |
| ENSP00000249042 | TST       | 1.14E-05 | 0.857 | - | - |
| ENSP00000039007 | OTC       | 1.49E-05 | 0.858 | - | - |
| ENSP00000310226 | RAB1B     | 1.18E-05 | 0.858 | - | - |
| ENSP00000262506 | CSNK2A2   | 1.03E-05 | 0.858 | - | - |
| ENSP00000376886 | NME1-NME2 | 1.01E-05 | 0.859 | - | - |
| ENSP00000363193 | MED12     | 1.30E-05 | 0.86  | - | - |
| ENSP00000231487 | SKP1      | 2.68E-05 | 0.861 | - | - |
| ENSP00000362592 | RBBP4     | 1.15E-05 | 0.863 | - | - |
| ENSP00000365877 | SUV39H1   | 1.29E-05 | 0.865 | - | - |
| ENSP00000297338 | RAD21     | 1.46E-05 | 0.866 | - | - |
| ENSP00000360532 | CDC5L     | 2.10E-05 | 0.867 | - | - |
| ENSP00000243253 | SEC61A1   | 1.10E-05 | 0.867 | - | - |
| ENSP00000360171 | TENM1     | 1.09E-05 | 0.867 | - | - |

|                 |         |          |       |   |   |
|-----------------|---------|----------|-------|---|---|
| ENSP00000220959 | UBR5    | 1.58E-05 | 0.868 | - | - |
| ENSP00000263593 | SIAE    | 1.20E-05 | 0.869 | - | - |
| ENSP00000240922 | NAA50   | 1.98E-05 | 0.87  | - | - |
| ENSP00000252674 | MLLT1   | 1.38E-05 | 0.875 | - | - |
| ENSP00000227868 | PDHX    | 1.17E-05 | 0.879 | - | - |
| ENSP00000360154 | OCRL    | 1.03E-05 | 0.879 | - | - |
| ENSP00000334051 | GNAL    | 1.32E-05 | 0.881 | - | - |
| ENSP00000367408 | CASK    | 1.53E-05 | 0.882 | - | - |
| ENSP00000216455 | PSMA3   | 1.94E-05 | 0.883 | - | - |
| ENSP00000272317 | RPS27A  | 1.47E-05 | 0.883 | - | - |
| ENSP00000322159 | ATG4C   | 1.15E-05 | 0.884 | - | - |
| ENSP00000369427 | RBBP7   | 1.53E-05 | 0.885 | - | - |
| ENSP00000377446 | SUCLG1  | 1.11E-05 | 0.887 | - | - |
| ENSP00000362441 | ATRX    | 1.04E-05 | 0.887 | - | - |
| ENSP00000233893 | HSPE1   | 1.30E-05 | 0.888 | - | - |
| ENSP00000346566 | CKAP5   | 2.63E-05 | 0.89  | - | - |
| ENSP00000013034 | NME1    | 1.87E-05 | 0.89  | - | - |
| ENSP00000344936 | PTTG1   | 1.09E-05 | 0.89  | - | - |
| ENSP00000312288 | HADH    | 1.85E-05 | 0.896 | - | - |
| ENSP00000348577 | RANGAP1 | 1.04E-05 | 0.896 | - | - |
| ENSP00000350512 | COPS5   | 2.42E-05 | 0.9   | - | - |
| ENSP00000326261 | SRRM1   | 1.09E-05 | 0.9   | - | - |

|                 |         |          |       |   |   |
|-----------------|---------|----------|-------|---|---|
| ENSP00000276072 | TAF1    | 1.02E-05 | 0.901 | - | - |
| ENSP00000276062 | NDUFB11 | 1.16E-05 | 0.902 | - | - |
| ENSP00000290158 | KPNB1   | 1.06E-05 | 0.902 | - | - |
| ENSP00000302896 | RPS9    | 1.19E-05 | 0.905 | - | - |
| ENSP00000381331 | HDAC2   | 2.99E-05 | 0.906 | - | - |
| ENSP00000216225 | RBX1    | 1.17E-05 | 0.909 | - | - |
| ENSP00000302955 | RRM2    | 1.58E-05 | 0.911 | - | - |
| ENSP00000369757 | RPS6    | 1.64E-05 | 0.914 | - | - |
| ENSP00000284811 | TCEB1   | 1.25E-05 | 0.918 | - | - |
| ENSP00000274255 | SKP2    | 1.48E-05 | 0.922 | - | - |
| ENSP00000265990 | BTAF1   | 1.18E-05 | 0.924 | - | - |
| ENSP00000419851 | GMPS    | 2.05E-05 | 0.925 | - | - |
| ENSP00000362576 | YARS    | 1.04E-05 | 0.925 | - | - |
| ENSP00000319169 | PRMT5   | 1.20E-05 | 0.927 | - | - |
| ENSP00000348762 | LSS     | 1.10E-05 | 0.928 | - | - |
| ENSP00000267868 | RAD51   | 2.02E-05 | 0.931 | - | - |
| ENSP00000260731 | KIF11   | 1.62E-05 | 0.932 | - | - |
| ENSP00000230354 | TBP     | 1.48E-05 | 0.934 | - | - |
| ENSP00000365572 | NME2    | 1.03E-05 | 0.936 | - | - |
| ENSP00000413572 | NLE1    | 1.25E-05 | 0.939 | - | - |
| ENSP00000316879 | EIF4G1  | 1.11E-05 | 0.939 | - | - |
| ENSP00000216911 | AURKA   | 1.78E-05 | 0.941 | - | - |

|                 |        |          |       |   |   |
|-----------------|--------|----------|-------|---|---|
| ENSP00000286428 | VBP1   | 1.41E-05 | 0.941 | - | - |
| ENSP00000381031 | EWSR1  | 1.27E-05 | 0.942 | - | - |
| ENSP00000356448 | TPR    | 1.07E-05 | 0.942 | - | - |
| ENSP00000328236 | KNTC1  | 2.21E-05 | 0.944 | - | - |
| ENSP00000380414 | DEK    | 1.10E-05 | 0.945 | - | - |
| ENSP00000246548 | UBA2   | 1.29E-05 | 0.946 | - | - |
| ENSP00000386541 | PSMD14 | 2.13E-05 | 0.947 | - | - |
| ENSP00000258962 | SRSF1  | 1.51E-05 | 0.947 | - | - |
| ENSP00000262030 | ATP5B  | 1.10E-05 | 0.948 | - | - |
| ENSP00000321656 | CDC25C | 1.09E-05 | 0.949 | - | - |
| ENSP00000344818 | UBC    | 3.77E-04 | 0.954 | - | - |
| ENSP00000278916 | CHEK1  | 2.01E-05 | 0.954 | - | - |
| ENSP00000359531 | GTF2B  | 1.16E-05 | 0.954 | - | - |
| ENSP00000245539 | MRPS7  | 1.03E-05 | 0.955 | - | - |
| ENSP00000395535 | MECP2  | 1.27E-05 | 0.956 | - | - |
| ENSP00000231572 | RARS   | 1.15E-05 | 0.956 | - | - |
| ENSP00000411532 | TOP2A  | 1.56E-05 | 0.96  | - | - |
| ENSP00000307940 | EEF2   | 1.13E-05 | 0.96  | - | - |
| ENSP00000223321 | PSMA2  | 1.98E-05 | 0.962 | - | - |
| ENSP00000303706 | CDC25A | 1.14E-05 | 0.962 | - | - |
| ENSP00000365439 | HNRNPK | 1.16E-05 | 0.963 | - | - |
| ENSP00000418447 | PPP2CA | 1.59E-05 | 0.964 | - | - |

|                 |          |          |       |   |   |
|-----------------|----------|----------|-------|---|---|
| ENSP00000261207 | PPP1R12A | 1.24E-05 | 0.965 | - | - |
| ENSP00000327070 | MDH2     | 1.20E-05 | 0.967 | - | - |
| ENSP00000301764 | DDB1     | 1.11E-05 | 0.967 | - | - |
| ENSP00000275603 | CCT6A    | 1.26E-05 | 0.968 | - | - |
| ENSP00000315644 | TYMS     | 1.57E-05 | 0.969 | - | - |
| ENSP00000305480 | FEN1     | 1.11E-05 | 0.969 | - | - |
| ENSP00000364794 | IARS     | 1.40E-05 | 0.97  | - | - |
| ENSP00000397552 | ACTL6A   | 1.26E-05 | 0.977 | - | - |
| ENSP00000308405 | H2AFV    | 1.06E-05 | 0.977 | - | - |
| ENSP00000300738 | RRM1     | 1.12E-05 | 0.981 | - | - |
| ENSP00000363676 | RPL11    | 1.09E-05 | 0.981 | - | - |
| ENSP00000258091 | CCT7     | 1.26E-05 | 0.982 | - | - |
| ENSP00000234420 | MSH6     | 1.26E-05 | 0.984 | - | - |
| ENSP00000356425 | UCHL5    | 1.11E-05 | 0.984 | - | - |
| ENSP00000331310 | MORF4L1  | 1.79E-05 | 0.986 | - | - |
| ENSP00000357858 | BUB3     | 1.38E-05 | 0.986 | - | - |
| ENSP00000357244 | CCT3     | 1.08E-05 | 0.986 | - | - |
| ENSP00000007516 | NDUFAB1  | 1.05E-05 | 0.987 | - | - |
| ENSP00000256442 | CCNB1    | 1.93E-05 | 0.988 | - | - |
| ENSP00000385269 | ELAVL1   | 3.51E-05 | 0.989 | - | - |
| ENSP00000367276 | CKAP2    | 2.27E-05 | 0.989 | - | - |
| ENSP00000336741 | DHX15    | 1.22E-05 | 0.989 | - | - |

|                 |        |          |       |   |   |
|-----------------|--------|----------|-------|---|---|
| ENSP00000364310 | H2AFX  | 1.01E-05 | 0.989 | - | - |
| ENSP00000382595 | PAICS  | 1.22E-05 | 0.991 | - | - |
| ENSP00000317334 | TCP1   | 1.36E-05 | 0.992 | - | - |
| ENSP00000296509 | MAD2L1 | 1.23E-05 | 0.992 | - | - |
| ENSP00000358563 | DKC1   | 1.09E-05 | 0.992 | - | - |
| ENSP00000314949 | POLR2A | 1.01E-05 | 0.992 | - | - |
| ENSP00000299300 | CCT2   | 1.42E-05 | 0.993 | - | - |
| ENSP00000296417 | H2AFZ  | 1.40E-05 | 0.993 | - | - |
| ENSP00000326031 | PPP1CA | 1.18E-05 | 0.993 | - | - |
| ENSP00000405965 | SUMO2  | 2.15E-05 | 0.994 | - | - |
| ENSP00000233146 | MSH2   | 1.42E-05 | 0.994 | - | - |
| ENSP00000296577 | ABCE1  | 1.31E-05 | 0.994 | - | - |
| ENSP00000300093 | PLK1   | 1.14E-05 | 0.996 | - | - |
