# Supplementary material for: Determination of Genes Related to Uveitis by Utilization of the Random Walk with Restart Algorithm on a Protein–Protein Interaction Network
Source: MDPI journal article supplement (doi:10.3390/ijms18051045), 2017-05-13
Supplement: s1 [file s1]

**Supplementary Table II.** The performance of the GBA-based method yielded by the five-fold cross-validation

| Index of part | $k$        | 1     | 2     | 3     | 4     | 5     | 6     | 7     | 8     | 9     |
|---------------|------------|-------|-------|-------|-------|-------|-------|-------|-------|-------|
| 1             | Recall     | 0.207 | 0.276 | 0.310 | 0.345 | 0.414 | 0.414 | 0.448 | 0.448 | 0.448 |
|               | Precision  | 0.061 | 0.046 | 0.036 | 0.032 | 0.032 | 0.027 | 0.025 | 0.023 | 0.021 |
|               | F1-measure | 0.094 | 0.078 | 0.064 | 0.058 | 0.059 | 0.051 | 0.048 | 0.044 | 0.040 |
| 2             | Recall     | 0.207 | 0.241 | 0.276 | 0.276 | 0.310 | 0.345 | 0.345 | 0.414 | 0.414 |
|               | Precision  | 0.059 | 0.038 | 0.032 | 0.024 | 0.023 | 0.022 | 0.019 | 0.020 | 0.018 |
|               | F1-measure | 0.092 | 0.066 | 0.057 | 0.045 | 0.042 | 0.041 | 0.036 | 0.038 | 0.035 |
| 3             | Recall     | 0.103 | 0.241 | 0.345 | 0.414 | 0.448 | 0.483 | 0.552 | 0.552 | 0.586 |
|               | Precision  | 0.031 | 0.040 | 0.039 | 0.036 | 0.032 | 0.030 | 0.030 | 0.027 | 0.026 |
|               | F1-measure | 0.047 | 0.069 | 0.069 | 0.066 | 0.060 | 0.057 | 0.057 | 0.051 | 0.049 |
| 4             | Recall     | 0.172 | 0.276 | 0.310 | 0.345 | 0.379 | 0.414 | 0.448 | 0.448 | 0.448 |
|               | Precision  | 0.052 | 0.045 | 0.035 | 0.031 | 0.028 | 0.026 | 0.025 | 0.022 | 0.020 |
|               | F1-measure | 0.079 | 0.078 | 0.063 | 0.056 | 0.052 | 0.049 | 0.047 | 0.042 | 0.039 |
| 5             | Recall     | 0.200 | 0.367 | 0.500 | 0.533 | 0.533 | 0.533 | 0.533 | 0.533 | 0.567 |
|               | Precision  | 0.064 | 0.062 | 0.061 | 0.052 | 0.043 | 0.037 | 0.032 | 0.029 | 0.028 |
|               | F1-measure | 0.097 | 0.106 | 0.109 | 0.094 | 0.079 | 0.068 | 0.061 | 0.055 | 0.052 |
|               |            |       |       |       |       |       |       |       |       |       |
| Index of part | $k$        | 20    | 30    | 40    | 50    | 60    | 70    | 80    | 90    | 100   |
| 1             | Recall     | 0.517 | 0.621 | 0.724 | 0.724 | 0.724 | 0.793 | 0.793 | 0.793 | 0.828 |
|               | Precision  | 0.012 | 0.011 | 0.010 | 0.009 | 0.008 | 0.008 | 0.007 | 0.006 | 0.006 |
|               | F1-measure | 0.024 | 0.022 | 0.021 | 0.018 | 0.015 | 0.015 | 0.014 | 0.013 | 0.013 |

|   |            |       |       |       |       |       |       |       |       |       |
|---|------------|-------|-------|-------|-------|-------|-------|-------|-------|-------|
| 2 | Recall     | 0.621 | 0.621 | 0.655 | 0.724 | 0.793 | 0.897 | 0.897 | 0.897 | 0.897 |
|   | Precision  | 0.014 | 0.011 | 0.009 | 0.009 | 0.008 | 0.008 | 0.008 | 0.007 | 0.007 |
|   | F1-measure | 0.028 | 0.021 | 0.018 | 0.017 | 0.017 | 0.017 | 0.015 | 0.014 | 0.013 |
| 3 | Recall     | 0.759 | 0.793 | 0.828 | 0.828 | 0.828 | 0.828 | 0.862 | 0.862 | 0.862 |
|   | Precision  | 0.017 | 0.014 | 0.011 | 0.010 | 0.009 | 0.008 | 0.007 | 0.007 | 0.006 |
|   | F1-measure | 0.034 | 0.027 | 0.023 | 0.019 | 0.017 | 0.015 | 0.014 | 0.013 | 0.013 |
| 4 | Recall     | 0.655 | 0.690 | 0.828 | 0.828 | 0.862 | 0.862 | 0.862 | 0.862 | 0.862 |
|   | Precision  | 0.015 | 0.012 | 0.012 | 0.010 | 0.009 | 0.008 | 0.007 | 0.007 | 0.006 |
|   | F1-measure | 0.030 | 0.024 | 0.023 | 0.020 | 0.018 | 0.016 | 0.015 | 0.014 | 0.013 |
| 5 | Recall     | 0.633 | 0.633 | 0.633 | 0.700 | 0.700 | 0.733 | 0.767 | 0.800 | 0.800 |
|   | Precision  | 0.016 | 0.012 | 0.010 | 0.009 | 0.008 | 0.007 | 0.007 | 0.007 | 0.006 |
|   | F1-measure | 0.031 | 0.023 | 0.019 | 0.018 | 0.016 | 0.015 | 0.014 | 0.013 | 0.013 |
