# Supplementary material for: Determination of Genes Related to Uveitis by Utilization of the Random Walk with Restart Algorithm on a Protein–Protein Interaction Network
Source: MDPI journal article supplement (doi:10.3390/ijms18051045), 2017-05-13
Supplement: s1 [file s1]

**Supplementary Table III.** Uveitis-related genes and their Ensembl IDs

| <b>Gene symbol</b> | <b>Ensembl ID</b> |
|--------------------|-------------------|
| C2                 | ENSP00000372853   |
|                    | ENSP00000405800   |
|                    | ENSP00000402278   |
|                    | ENSP00000364660   |
|                    | ENSP00000392835   |
|                    | ENSP00000407961   |
|                    | ENSP00000299367   |
| CD4                | ENSP00000011653   |
| CFB                | ENSP00000416561   |
|                    | ENSP00000410815   |
| CFH                | ENSP00000356399   |
| CRP                | ENSP00000255030   |
| DMD                | ENSP00000354923   |
| F5                 | ENSP00000356771   |
| IL2                | ENSP00000226730   |
| IL6                | ENSP00000258743   |
| IL7                | ENSP00000263851   |
| IL8                | ENSP00000306512   |
| MIF                | ENSP00000215754   |
| MIP                | ENSP00000257979   |
| TNF                | ENSP00000398698   |
|                    | ENSP00000389265   |
|                    | ENSP00000389492   |
|                    | ENSP00000392858   |
|                    | ENSP00000389490   |
|                    | ENSP00000410668   |
|                    | ENSP00000372988   |
|                    | ENSP00000365290   |
| ACTG2              | ENSP00000295137   |
| CARD15             | -                 |
| CARD9              | ENSP00000360797   |
| CASP1              | ENSP00000410076   |
| CASP3              | ENSP00000311032   |
| CCL2               | ENSP00000225831   |
| CCL5               | ENSP00000293272   |
| CCR1               | ENSP00000296140   |
| CCR2               | ENSP00000292301   |
| CCR3               | ENSP00000350003   |
| CCR4               | ENSP00000332659   |

|         |                 |
|---------|-----------------|
| CCR5    | ENSP00000292303 |
| CCR6    | ENSP00000339393 |
| CCR7    | ENSP00000246657 |
| CD25    | -               |
| CD27    | ENSP00000266557 |
| CD274   | ENSP00000370989 |
| CD28    | ENSP00000324890 |
| CD30    | -               |
| CD40    | ENSP00000361359 |
| CD45    | -               |
| CD57    | -               |
| CD69    | ENSP00000228434 |
| CD74    | ENSP00000009530 |
| CD86    | ENSP00000332049 |
| CNKSRR3 | ENSP00000356182 |
| CTLA4   | ENSP00000303939 |
| CTSC    | ENSP00000227266 |
| CTSH    | ENSP00000220166 |
| CX3CL1  | ENSP00000006053 |
| CX3CR1  | ENSP00000382166 |
| CXCL10  | ENSP00000305651 |
| CXCR3   | ENSP00000362795 |
| ECAD    | -               |
| EOMES   | ENSP00000295743 |
| ERAP1   | ENSP00000296754 |
| ERAP2   | -               |
| FCRL3   | ENSP00000357167 |
| FOXP3   | ENSP00000365380 |
| GIMAP2  | ENSP00000223293 |
| GIMAP4  | ENSP00000255945 |
| GLI1    | ENSP00000228682 |
| GPR35   | ENSP00000322731 |
| GPR37   | ENSP00000306449 |
| GPR65   | ENSP00000267549 |
| GZMH    | ENSP00000216338 |
| HLA-A   | ENSP00000416233 |
|         | ENSP00000388526 |
|         | ENSP00000398188 |
|         | ENSP00000373114 |
|         | ENSP00000388724 |
|         | ENSP00000410645 |
| HLA-B   | ENSP00000366005 |
|         | ENSP00000399168 |

|         |                 |
|---------|-----------------|
|         | ENSP00000400842 |
| HLA-C   | ENSP00000365402 |
|         | ENSP00000372975 |
|         | ENSP00000390282 |
|         | ENSP00000407431 |
|         | ENSP00000397867 |
|         | ENSP00000383245 |
|         | ENSP00000413992 |
| ICAM1   | ENSP00000264832 |
| IDO1    | ENSP00000253513 |
| IFNG    | ENSP00000229135 |
| IL10    | ENSP00000412237 |
| IL12A   | ENSP00000303231 |
| IL12B   | ENSP00000231228 |
| IL12RB2 | ENSP00000262345 |
| IL17A   | ENSP00000344192 |
| IL18    | ENSP00000280357 |
| IL1R1   | ENSP00000233946 |
| IL1R2   | ENSP00000330959 |
| IL21    | ENSP00000264497 |
| IL22    | ENSP00000329384 |
| IL23    | -               |
| IL23R   | ENSP00000321345 |
| IL4R    | ENSP00000170630 |
| IL7R    | ENSP00000306157 |
| IRF5    | ENSP00000349770 |
| JAG1    | ENSP00000254958 |
| JAK2    | ENSP00000371067 |
| KLRC4   | ENSP00000310216 |
| LCE3B   | ENSP00000335358 |
| LCE3C   | ENSP00000334644 |
| LFNG    | ENSP00000222725 |
| LNPEP   | ENSP00000231368 |
| MAPK9   | ENSP00000321410 |
| MEFV    | ENSP00000219596 |
| NKAP    | ENSP00000360464 |
| NOD2    | ENSP00000300589 |
| NPEPPS  | ENSP00000320324 |
| NQO1    | ENSP00000319788 |
| PDCD1   | ENSP00000335062 |
| PSMG1   | ENSP00000329915 |
| PTPN22  | ENSP00000352833 |
| RAB27A  | -               |

|          |                 |
|----------|-----------------|
| RALGPS2  | ENSP00000356607 |
| RUNX3    | ENSP00000343477 |
| SPP1     | ENSP00000378517 |
| STAT3    | ENSP00000264657 |
| STAT4    | ENSP00000351255 |
| SUMO4    | ENSP00000318635 |
| TAB2     | ENSP00000286332 |
| TBX21    | ENSP00000177694 |
| TGFB2    | ENSP00000355896 |
| TGFBR3   | ENSP00000212355 |
| TGM2     | ENSP00000355330 |
| TLR4     | ENSP00000363089 |
| TNFAIP3  | ENSP00000237289 |
| TYK2     | ENSP00000264818 |
| UBAC2    | ENSP00000383911 |
| UBE2L3   | ENSP00000344259 |
| VEGFB    | ENSP00000311127 |
| WNT5B    | ENSP00000308887 |
| ZMIZ1    | ENSP00000334474 |
| HLA-DQA1 | ENSP00000401760 |
|          | ENSP00000414360 |
|          | ENSP00000372738 |
|          | ENSP00000339398 |
|          | ENSP00000409127 |
| HLA-DQB1 | ENSP00000387892 |
|          | ENSP00000382025 |
|          | ENSP00000382018 |
|          | ENSP00000372734 |
| HLA-DRB1 | ENSP00000382034 |
| HLA-DRB1 | ENSP00000353099 |
| PDCD1LG2 | -               |
